# Supplementary material for: Iodine recycling via 1,3-migration in iodoindoles under metal catalysis
Source: Royal Society of Chemistry journal article supplement (doi:10.1039/c3cc44073g), 2013-01-01

## Electronic Supplementary Information

### Iodine Recycling via 1,3-Migration in Iodoindoles under Metal Catalysis

Benito Alcaide,<sup>\*,1</sup> Pedro Almendros,<sup>\*,2</sup> José M. Alonso,<sup>1</sup> Sara Cembellín,<sup>1</sup> Israel Fernández,<sup>3</sup> Teresa Martínez del Campo,<sup>1</sup> and M. Rosario Torres<sup>4</sup>

<sup>1</sup>*Grupo de Lactamas y Heterociclos Bioactivos, Departamento de Química Orgánica I, Unidad Asociada al CSIC, Facultad de Química, Universidad Complutense de Madrid, 28040-Madrid, Spain*

<sup>2</sup>*Instituto de Química Orgánica General, IQOG, CSIC, Juan de la Cierva 3, 28006-Madrid, Spain*

<sup>3</sup>*Departamento de Química Orgánica I, Facultad de Química, Universidad Complutense de Madrid, 28040-Madrid, Spain*

<sup>4</sup>*CAI Difracción de Rayos X, Facultad de Química, Universidad Complutense de Madrid, 28040-Madrid, Spain*

E-mail: alcaideb@quim.ucm.es; Palmendros@iqog.csic.es

**General Methods:** <sup>1</sup>H NMR and <sup>13</sup>C NMR spectra were recorded on a Bruker Avance AVIII-700 with cryoprobe, Bruker AMX-500, Bruker Avance-300, Varian VRX-300S or Bruker AC-200. NMR spectra were recorded in CDCl<sub>3</sub> solutions, except otherwise stated. Chemical shifts are given in ppm relative to TMS (<sup>1</sup>H, 0.0 ppm), or CDCl<sub>3</sub> (<sup>13</sup>C, 76.9 ppm). Low and high resolution mass spectra were taken on an AGILENT 6520 Accurate-Mass QTOF LC/MS spectrometer using the electronic impact (EI) or electrospray modes (ES) unless otherwise stated. IR spectra were recorded on a Bruker Tensor 27 spectrometer. Specific rotation [ $\alpha$ ]<sub>D</sub> is given in 10<sup>-1</sup> deg cm<sup>2</sup> g<sup>-1</sup> at 20 °C, and the concentration (c) is expressed in g per 100 mL. All commercially available compounds were used without further purification.

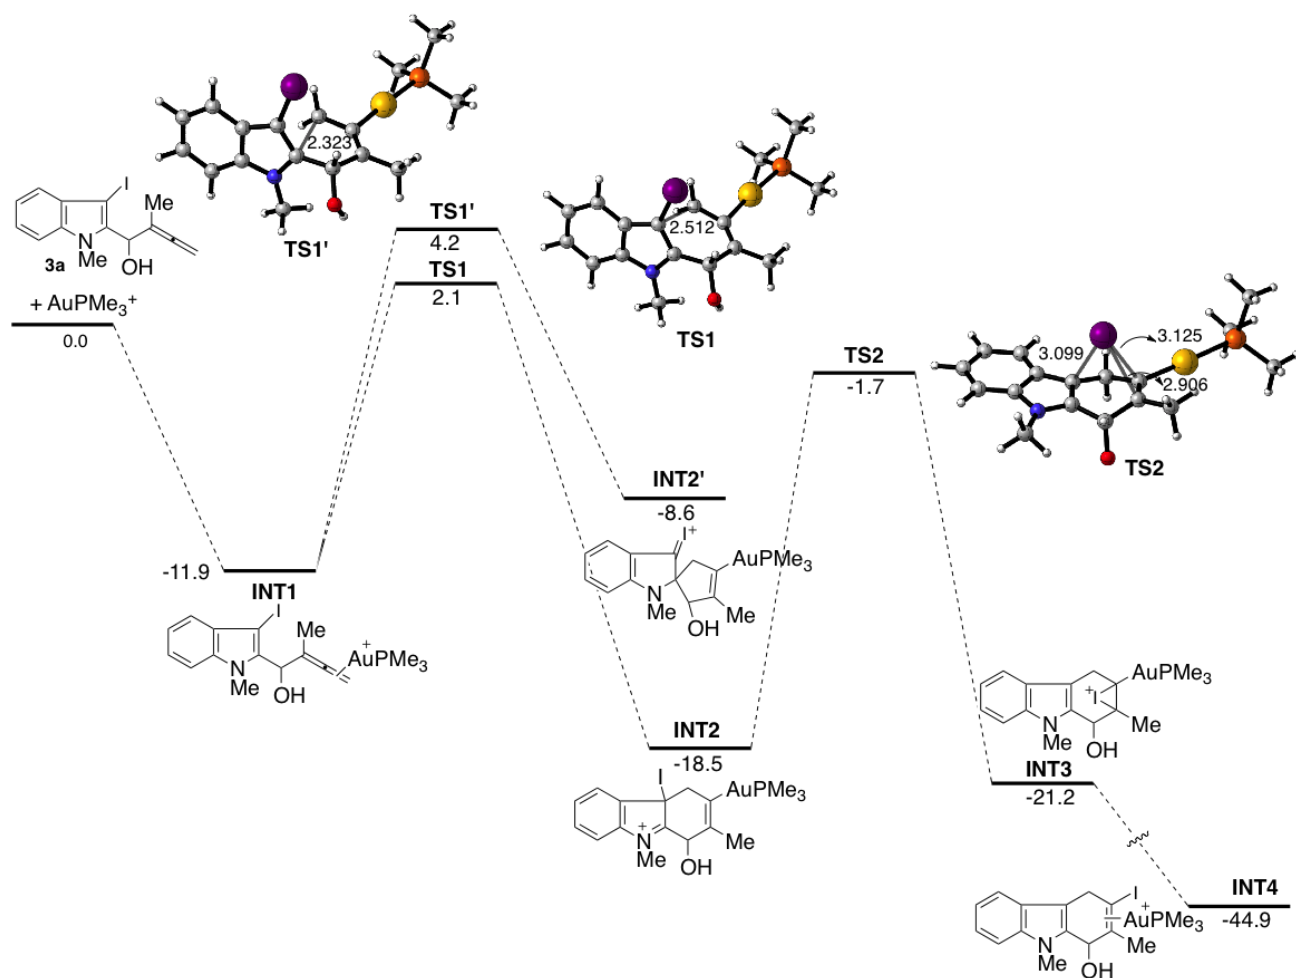

**Figure 2.** Computed reaction profile (PCM(dichloroethane)-M06/def2-SVP// B3LYP/def2-SVP level) for the reaction between **3a** and  $\text{AuPMe}_3^+$ . Relative free energies are given in kcal/mol and bond distances in the transition states in angstroms.

### Crossover experiment to test if the iodine transfer is intramolecular or intermolecular.

We carried out the reaction of a 1:1 mixture of 1-(3-iodo-1-methyl-1*H*-indol-2-yl)-2-methylbuta-2,3-dien-1-ol (iodoallene **3a**) and 1-(1-methyl-1*H*-indol-2-yl)-2-phenylbuta-2,3-dien-1-ol (same allene as **3a** but replacing C-Me for C-Ph and without the iodine substituent). In the event, the gold catalyzed treatment of both allenyl-indoles did not show any appreciable formation of the phenylsubstituted iodocarbazole (see Scheme S1 in the ESI); which points to an intramolecular shift of iodine.

Scheme S1

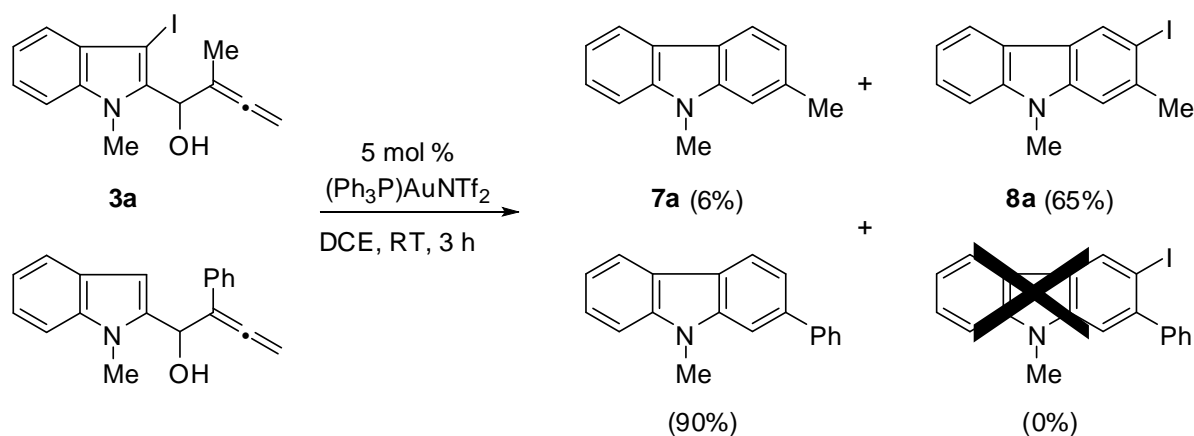

**Indium-promoted reaction between 3-substituted prop-2-ynyl bromides and 3- functionalized-indole-2-carbaldehydes; general procedure for the synthesis of  $\alpha$ -allenic alcohols 1–4.** 1-Bromo-2-butyne, 1-bromopent-2-yne, or 1-bromo-3-phenyl-2-propyne (3.0 mmol) was added to a well stirred suspension of the corresponding aldehyde (1.0 mmol) and indium powder (6.0 mmol) in THF/ $\text{NH}_4\text{Cl}$  (aq. sat.) (1:5, 5 mL) at 0 °C. After disappearance of the starting material (TLC) the mixture was extracted with ethyl acetate (3 x 5 mL). The organic extract was washed with brine, dried ( $\text{MgSO}_4$ ) and concentrated under reduced pressure. Chromatography of the residue using ethyl acetate/hexanes or dichloromethane/ethyl acetate mixtures gave analytically pure compounds. Spectroscopic and analytical data for  $\alpha$ -allenic alcohols 1–4 follow.

**$\alpha$ -Allenic alcohol 1.** From 369 mg (1.91 mmol) of the corresponding aldehyde, and after chromatography of the residue using hexanes/ethyl acetate (8:1) as eluent gave compound **1** (320 mg, 68%) as a colorless oil;  $^1\text{H}$  NMR (300 MHz,  $\text{CDCl}_3$ , 25 °C):  $\delta$  = 7.61 (dt, 1H,  $J$  = 7.7, 0.9 Hz, Ar), 7.29 (m, 2H, Ar), 7.19 (td, 1H,  $J$  = 7.2, 1.8 Hz, Ar), 5.67 (q, 1H,  $J$  = 3.8 Hz, OCH), 5.02 (m, 2H, = $\text{CH}_2$ ), 3.82 (s, 3H, NMe), 2.45 (d, 1H,  $J$  = 3.1 Hz, OH), 1.62 (td, 3H,  $J$  = 3.1, 0.7 Hz, Me);  $^{13}\text{C}$  NMR (75 MHz,

$\text{CDCl}_3$ , 25 °C):  $\delta$  = 203.5 (C=C=CH<sub>2</sub>), 136.5, 132.1, 124.7, 123.0 (Ar, CH), 120.0 (Ar, CH), 118.4 (Ar, CH), 109.2 (Ar, CH), 105.0, 101.5, 79.7 (C=CH<sub>2</sub>), 65.7 (OCH), 31.0 (NMe), 15.4 (Me); IR (CHCl<sub>3</sub>):  $\nu$  = 3417, 1962, 1468, 741 cm<sup>-1</sup>; HRMS (ES): calcd for C<sub>14</sub>H<sub>14</sub>ClNO [M]<sup>+</sup>: 247.0764; found: 247.0756.

**$\alpha$ -Allenic alcohol 2.** From 160 mg (0.675 mmol) of the corresponding aldehyde, and after chromatography of the residue using hexanes/ethyl acetate (6:1) as eluent gave compound **2** (184 mg, 94%) as a pale orange oil; <sup>1</sup>H NMR (300 MHz, CDCl<sub>3</sub>, 25 °C):  $\delta$  = 7.46 (1H, d, *J* = 7.7 Hz, CH Ar), 7.20 (2H, m, CH Ar), 7.10 (1H, m, CH Ar), 5.60 (1H, m, CHOH), 4.93 (2H, m, CH=C=CHH), 3.75 (3H, s, NMe), 1.52 (3H, m, Me); <sup>13</sup>C NMR (75 MHz, CDCl<sub>3</sub>, 25 °C):  $\delta$  = 203.5 (1C, C=C=CHH), 137.4 (1C, C Ar), 133.8 (1C, C Ar), 126.3 (1C, Ar), 123.1 (1C, CH Ar), 120.2 (1C, CH Ar), 119.5 (1C, CH Ar), 109.3 (1C, CH Ar), 101.6 (1C, C Ar), 91.9 (1C, Ar), 79.8 (1C, C=C=CHH), 66.8 (1C, CHOH), 31.2 (1C, Me), 15.5 (1C, Me); IR (CHCl<sub>3</sub>):  $\nu$  = 3412, 1965, 1542, 1043 cm<sup>-1</sup>; HRMS (ES): calcd for C<sub>14</sub>H<sub>14</sub>BrNO [M]<sup>+</sup>: 291.0259; found: 291.0270.

**$\alpha$ -Allenic alcohol 3a.** From 250 mg (0.88 mmol) of the corresponding aldehyde, and after chromatography of the residue using hexanes/ethyl acetate (12:1) as eluent gave compound **3a** (232 mg, 78%) as a colorless oil; <sup>1</sup>H NMR (300 MHz, CDCl<sub>3</sub>, 25 °C):  $\delta$  = 7.44 (dt, 1H, *J* = 7.9, 0.9 Hz, Ar), 7.30 (m, 2H, Ar), 7.20 (td, 1H, *J* = 7.9, 3.9 Hz, Ar), 5.66 (td, 1H, *J* = 4.3, 0.8 Hz, OCH), 5.04 (m, 2H, =CH<sub>2</sub>), 3.87 (s, 3H, NMe), 2.39 (br s, 1H, OH), 1.62 (td, 3H, *J* = 3.1, 0.7 Hz, Me); <sup>13</sup>C NMR (75 MHz, CDCl<sub>3</sub>, 25 °C):  $\delta$  = 203.5 (C=C=CH<sub>2</sub>), 138.8, 136.8, 129.5, 123.2 (Ar, CH), 121.6 (Ar, CH), 120.4 (Ar, CH), 109.4 (Ar, CH), 101.8, 79.8 (C=CH<sub>2</sub>), 68.7 (OCH), 61.0, 31.2 (NMe), 15.6 (Me); IR (CHCl<sub>3</sub>):  $\nu$  = 3437, 1961, 1467, 743 cm<sup>-1</sup>; HRMS (ES): calcd for C<sub>14</sub>H<sub>14</sub>INO [M]<sup>+</sup>: 339.0120; found: 339.0133.

**$\alpha$ -Allenic alcohol 3b.** From 228 mg (0.80 mmol) of the corresponding aldehyde, compound **3b** (254 mg, 90%) was obtained as crude material. Allenol **3b** easily decomposes and was used for next step without purification.

**$\alpha$ -Allenic alcohol 3c.** From 272 mg (0.95 mmol) of the corresponding aldehyde, and after chromatography of the residue using hexanes/ethyl acetate (20:1) as eluent gave compound **3c** (144 mg, 38%) as a colorless oil; <sup>1</sup>H NMR (300 MHz, CDCl<sub>3</sub>, 25 °C):  $\delta$  = 7.44 (m, 3H, Ar), 7.29 (m, 4H, Ar), 7.20 (m, 2H, Ar), 6.30 (t, 1H, *J* = 4.0 Hz, OCH), 5.25 (qd, 2H, *J* = 12.2, 4.0 Hz, =CH<sub>2</sub>), 3.91 (s, 3H, NMe), 2.51 (br s, 1H, OH); <sup>13</sup>C NMR (75 MHz, CDCl<sub>3</sub>, 25 °C):  $\delta$  = 207.0 (C=C=CH<sub>2</sub>), 138.6, 137.2, 133.5, 129.6, 128.6 (Ar, 2CH), 127.5 (Ar, CH), 126.9 (Ar, 2CH), 123.2 (Ar, CH), 121.6 (Ar, CH), 120.3 (Ar,

CH), 109.4 (Ar, CH), 108.4, 81.4 (C=CH<sub>2</sub>), 67.2 (OCH), 61.0, 31.5 (NMe); IR (CHCl<sub>3</sub>):  $\nu = 3452, 1964, 1470, 743 \text{ cm}^{-1}$ ; HRMS (ES): calcd for C<sub>19</sub>H<sub>16</sub>INO [M]<sup>+</sup>: 401.0277; found: 401.0278.

**$\alpha$ -Allenic alcohol 3d.** From 120 mg (0.38 mmol) of the corresponding aldehyde, and after chromatography of the residue using hexanes/ethyl acetate (6:1) as eluent gave compound **3d** (126 mg, 90%) as a colorless oil; <sup>1</sup>H NMR (300 MHz, CDCl<sub>3</sub>, 25 °C):  $\delta = 7.18$  (d, 1H,  $J = 8.8$  Hz, Ar), 6.92 (dd, 1H,  $J = 8.9, 2.5$  Hz, Ar), 6.85 (d, 1H,  $J = 2.5$  Hz, Ar), 5.62 (t, 1H,  $J = 4.1$  Hz, OCH), 5.01 (m, 2H, =CH<sub>2</sub>), 3.90 (s, 3H, NMe), 3.83 (s, 3H, OMe), 2.49 (br s, 1H, OH), 1.61 (t, 3H,  $J = 3.1$  Hz, Me); <sup>13</sup>C NMR (75 MHz, CDCl<sub>3</sub>, 25 °C):  $\delta = 203.5$  (C=C=CH<sub>2</sub>), 154.8, 137.0, 133.8, 129.8, 113.8 (Ar, CH), 110.3 (Ar, CH), 102.7 (Ar, CH), 101.7, 79.7 (C=CH<sub>2</sub>), 68.7 (OCH), 60.2, 55.9 (OMe), 31.3 (NMe), 15.6 (Me); IR (CHCl<sub>3</sub>):  $\nu = 3439, 1961, 1488, 1169, 733 \text{ cm}^{-1}$ ; HRMS (ES): calcd for C<sub>15</sub>H<sub>16</sub>INO<sub>2</sub> [M]<sup>+</sup>: 369.0226; found: 369.0230.

**$\alpha$ -Allenic alcohol 3e.** From 225 mg (0.70 mmol) of the corresponding aldehyde, and after chromatography of the residue using hexanes/ethyl acetate (4:1) as eluent gave compound **3e** (224 mg, 85%) as a pale brown solid; mp 113–114 °C; <sup>1</sup>H NMR (300 MHz, CDCl<sub>3</sub>, 25 °C):  $\delta = 7.41$  (m, 1H, Ar), 7.21 (m, 2H, Ar), 5.62 (t, 1H,  $J = 4.2$  Hz, OCH), 5.02 (m, 2H, =CH<sub>2</sub>), 3.84 (s, 3H, NMe), 2.39 (br s, 1H, OH), 1.61 (t, 3H,  $J = 3.2$  Hz, Me); <sup>13</sup>C NMR (75 MHz, CDCl<sub>3</sub>, 25 °C):  $\delta = 203.5$  (C=C=CH<sub>2</sub>), 138.2, 137.2, 130.6, 126.2, 123.5 (Ar, CH), 121.0 (Ar, CH), 110.5 (Ar, CH), 101.6, 80.0 (C=CH<sub>2</sub>), 68.7 (OCH), 59.9, 31.4 (NMe), 15.6 (Me); IR (CHCl<sub>3</sub>):  $\nu = 3401, 1961, 1470, 1064, 740 \text{ cm}^{-1}$ ; HRMS (ES): calcd for C<sub>14</sub>H<sub>13</sub>ClINO [M]<sup>+</sup>: 372.9730; found: 372.9741.

**$\alpha$ -Allenic alcohol 3f.** From 200 mg (0.738 mmol) of the corresponding aldehyde, and after chromatography of the residue using hexanes/ethyl acetate (7:1) as eluent gave compound **3f** (236 mg, 99%) as a pale yellow oil; <sup>1</sup>H NMR (300 MHz, CDCl<sub>3</sub>, 25 °C):  $\delta = 8.68$  (1H, s, NH), 7.48 (1H, m, CH Ar), 7.38 (1H, m, CH Ar), 7.25 (2H, m, CH Ar), 5.50 (1H, s, CHOH), 5.02 (2H, q,  $J = 2.8$  Hz, CH=C=CHH), 1.69 (3H, t,  $J = 2.8$  Hz, Me); <sup>13</sup>C NMR (75 MHz, CDCl<sub>3</sub>, 25 °C):  $\delta = 204.8$  (1C, C=C=CHH), 138.1 (1C, C Ar), 135.6 (1C, C Ar), 130.4 (1C, Ar), 123.3 (1C, CH Ar), 120.9 (1C, CH Ar), 120.7 (1C, CH Ar), 111.3 (1C, CH Ar), 101.4 (1C, C Ar), 78.9 (1C, C=C=CHH), 69.3 (1C, CHOH), 58.6 (1C, Cl Ar), 14.7 (1C, Me); IR (CHCl<sub>3</sub>):  $\nu = 3439, 1967, 1542, 1038 \text{ cm}^{-1}$ ; HRMS (ES): calcd for C<sub>13</sub>H<sub>12</sub>NOI [M]<sup>+</sup>: 324.9964; found: 324.9952.

**$\alpha$ -Allenic alcohol 3g.** From 150 mg (0.544 mmol) of the corresponding aldehyde, and after chromatography of the residue using hexanes/ethyl acetate (6:1) as eluent gave compound **3g** (180 mg, 70%) as a pale yellow oil;  $^1\text{H}$  NMR (300 MHz,  $\text{CDCl}_3$ , 25 °C):  $\delta$  = 8.72 (1H, s, NH), 7.46 (3H, m, CH Ar), 7.29 (6H, m, CH Ar), 6.11 (1H, s, CHOH), 5.33 (2H, m, CH=C=CHH), 2.59 (1H, s, OH);  $^{13}\text{C}$  NMR (75 MHz,  $\text{CDCl}_3$ , 25 °C):  $\delta$  = 207.6 (1C, C=C=CHH), 138.3 (1C, C Ar), 135.5 (1C, C Ar), 133.2 (1C, Ar), 130.6 (1C, C Ar), 128.8 (2C, CH Ar), 127.6 (1C, CH Ar), 126.7 (2C, CH Ar), 123.4 (1C, CH Ar), 121.0 (1C, CH Ar), 120.8 (1C, CH Ar), 111.5 (1C, CH Ar), 108.15 (1C, C=C=CHH), 81.9 (1C, C=C=CHH), 67.4 (1C, CHOH), 59.1 (1C, C-I Ar), 55.8 (1C, OMe); IR ( $\text{CHCl}_3$ ):  $\nu$  = 3495, 1542, 1038  $\text{cm}^{-1}$ ; HRMS (ES): calcd for  $\text{C}_{18}\text{H}_{14}\text{NOI}[M]^+$ : 387.0120; found: 387.0140.

**$\alpha$ -Allenic alcohol 3h.** From 143 mg (0.477 mmol) of the corresponding aldehyde, and after chromatography of the residue using hexanes/ethyl acetate (6:1) as eluent gave compound **3h** (146 mg, 87%) as a colorless oil;  $^1\text{H}$  NMR (300 MHz,  $\text{CDCl}_3$ , 25 °C):  $\delta$  = 8.50 (1H, s, NH), 7.12 (1H, m, CH Ar), 6.81 (2H, m, CH Ar), 5.36 (1H, s, CHOH), 4.89 (2H, m, CH=C=CHH), 3.81 (3H, s, OMe), 1.57 (3H, t,  $J$  = 3.2 Hz, Me);  $^{13}\text{C}$  NMR (75 MHz,  $\text{CDCl}_3$ , 25 °C):  $\delta$  = 204.9 (1C, C=C=CHH), 155.0 (1C, C Ar), 138.6 (1C, C Ar), 130.9 (1C, Ar), 130.5 (1C, C Ar), 113.8 (1C, CH Ar), 112.3 (1C, CH Ar), 102.2 (1C, CH Ar), 101.3 (1C, C=), 78.8 (1C, C=C=CHH), 69.3 (1C, CHOH), 58.6 (1C, C-I Ar), 55.8 (1C, OMe), 14.7 (1C, Me); IR ( $\text{CHCl}_3$ ):  $\nu$  = 3552, 1967, 1540, 1038  $\text{cm}^{-1}$ ; HRMS (ES): calcd for  $\text{C}_{14}\text{H}_{14}\text{NO}_2\text{I}[M]^+$ : 355.0069; found: 355.0077.

**$\alpha$ -Allenic alcohol 4a.** From 215 mg (0.86 mmol) of the corresponding aldehyde, and after chromatography of the residue using hexanes/ethyl acetate (8:1) as eluent gave compound **4a** (201 mg, 77%) as a colorless oil;  $^1\text{H}$  NMR (300 MHz,  $\text{CDCl}_3$ , 25 °C):  $\delta$  = 7.35 (d, 1H,  $J$  = 8.3 Hz, Ar), 7.26 (m, 4H, Ar), 7.02 (m, 4H, Ar), 5.49 (br s, 1H, OCH), 4.88 (m, 2H, =CH<sub>2</sub>), 3.83 (s, 3H, NMe), 2.46 (d, 1H,  $J$  = 2.6 Hz, OH), 1.63 (t, 3H,  $J$  = 2.6 Hz, Me);  $^{13}\text{C}$  NMR (75 MHz,  $\text{CDCl}_3$ , 25 °C):  $\delta$  = 204.0 (C=C=CH<sub>2</sub>), 159.3, 135.3, 131.5, 129.4 (Ar, 2CH), 126.8, 122.5 (Ar, CH), 121.8 (Ar, CH), 119.8, 119.3 (Ar, CH), 118.4 (Ar, CH), 115.5 (Ar, 2CH), 109.2 (Ar, CH), 101.5, 79.1 (C=CH<sub>2</sub>), 65.3 (OCH), 30.6 (NMe), 15.6 (Me); IR ( $\text{CHCl}_3$ ):  $\nu$  = 3401, 1961, 1490, 1369, 1216, 740  $\text{cm}^{-1}$ ; HRMS (ES): calcd for  $\text{C}_{20}\text{H}_{19}\text{NO}_2[M]^+$ : 305.1416; found: 305.1420.

**$\alpha$ -Allenic alcohol 4b.** From 175 mg (0.57 mmol) of allenol **4a**, and after chromatography of the residue using hexanes/ethyl acetate (12:1) as eluent gave compound **4b** (79 mg, 43%) as a colorless oil;

$^1\text{H}$  NMR (300 MHz,  $\text{CDCl}_3$ , 25 °C):  $\delta$  = 7.37 (d, 1H,  $J$  = 8.3 Hz, Ar), 7.26 (m, 4H, Ar), 7.00 (m, 4H, Ar), 5.07 (t, 1H,  $J$  = 3.8 Hz, OCH), 4.75 (m, 2H, =CH<sub>2</sub>), 3.83 (s, 3H, NMe), 3.30 (s, 3H, OMe), 1.66 (t, 3H,  $J$  = 3.1 Hz, Me);  $^{13}\text{C}$  NMR (75 MHz,  $\text{CDCl}_3$ , 25 °C):  $\delta$  = 205.5 (C=C=CH<sub>2</sub>), 159.3, 135.4, 132.9, 129.3 (Ar, 2CH), 125.3, 122.4 (Ar, CH), 121.7 (Ar, CH), 119.7, 119.2 (Ar, CH), 118.3 (Ar, CH), 115. (Ar, 2CH), 109.2 (Ar, CH), 99.3, 76.8 (C=CH<sub>2</sub>), 74.5 (OCH), 57.1 (OMe), 30.7 (NMe), 16.2 (Me); IR ( $\text{CHCl}_3$ ):  $\nu$  = 1961, 1489, 1369, 1215, 742  $\text{cm}^{-1}$ ; HRMS (ES): calcd for  $\text{C}_{21}\text{H}_{21}\text{NO}_2$  [ $M$ ]<sup>+</sup>: 319.1572; found: 319.1564.

**$\alpha$ -Allenic alcohol 4c.** From 195 mg (0.78 mmol) of the corresponding aldehyde, compound **4c** (244 mg, 85%) was obtained as crude material. Allenol **4c** easily decomposes and was used for next step without purification.

**Procedure for the palladium-catalyzed reaction of 3-bromo (indol-2-yl)- $\alpha$ -allenol 2.** Pd(PPh<sub>3</sub>)<sub>2</sub>Cl<sub>2</sub> (7 mg) was added to a solution of allenol **2** (60 mg, 0.206 mmol) in DMF (2 mL). After total consumption of the starting material (TLC), the mixture was diluted with AcOEt, washed with water, washed with brine, and dried over MgSO<sub>4</sub>. After filtration, the solvent was evaporated under reduced pressure, and the crude mixture was purified on column chromatography (hexanes/AcOEt 10:1). Dihydrofuran **5b** (5 mg, 8%) was isolated from a complicated reaction mixture.

**Dihydrofuran 5b.** Colorless oil;  $^1\text{H}$  NMR (300 MHz,  $\text{CDCl}_3$ , 25 °C):  $\delta$  = 7.54 (1H, d,  $J$  = Hz, Ar), 7.27 (2H, m, Ar), 7.17 (1H, m, Ar), 6.19 (1H, m, CH=), 5.75 (1H, m, CHOH), 4.85 (2H, m, CHH), 3.72 (3H, s, NMe), 1.60 (1H, s, Me);  $^{13}\text{C}$  NMR (75 MHz,  $\text{CDCl}_3$ , 25 °C):  $\delta$  = 136.6 (1C, C Ar), 135.5 (1C, C Ar), 131.9 (1C, Ar), 126.9 (1C, C Ar), 121.9 (1C, CH Ar), 120.3 (1C, CH Ar), 119.3 (1C, CH Ar), 118.5 (1C, CH Ar), 108.0 (1C, CH Ar), 91.3 (1C, C Ar), 81.8 (1C, CH Ar), 73.4 (1C, CHH), 28.4 (1C, NMe), 10.5 (1C, Me); IR ( $\text{CHCl}_3$ ):  $\nu$  = 2850, 1377, 1188, 599  $\text{cm}^{-1}$ ; HRMS (ES): calcd for  $\text{C}_{14}\text{H}_{14}\text{BrNO}$  [ $M$ ]<sup>+</sup>: 291.0259; found: 291.0273.

**General procedure for the gold-catalyzed reaction of 3-chloro/bromo (indol-2-yl)- $\alpha$ -allenols 1 and 2.** [(Ph<sub>3</sub>P)AuNTf<sub>2</sub>] (0.05 mmol) was added to a stirred solution of the corresponding allenol **1** or **2** (1.0 mmol) in 1,2-dichloroethane (13.0 mL) under argon. The resulting mixture was stirred at room temperature until disappearance of the starting material (TLC). After filtration through a pad of Celite, the



mixture was extracted with ethyl acetate (3 x 5 mL), and the combined extracts were washed twice with brine. The organic layer was dried (MgSO<sub>4</sub>) and concentrated under reduced pressure. Chromatography of the residue eluting with ethyl acetate/hexanes mixtures gave adducts **5** and **6**.

**Reaction of chloro-allenol 1.** From 69 mg (0.28 mmol) of allenol **1**, and after chromatography of the residue using hexanes/ethyl acetate (20:1) as eluent, 14 mg (20%) of the less polar compound **6a** and 5 mg (8%) of the more polar compound **5a** were obtained.

**Diene 6a.** Colorless oil (diastereomeric mixture 60:40); <sup>1</sup>H NMR (300 MHz, CDCl<sub>3</sub>, 25 °C): δ = 7.50 (dt, 0.6H, *J* = 7.7, 1.1 Hz, Ar), 7.44 (d, 1H, *J* = 8.2 Hz, Ar), 7.39 (d, 0.4H, *J* = 8.3 Hz, Ar), 7.22 (m, 1H, Ar), 7.12 (m, 1H, Ar), 7.00 (s, 0.6H, =CH), 6.44 (q, 0.4H, *J* = 1.5 Hz, =CH), 5.84 (d, 0.6H, *J* = 1.6 Hz, =CHH), 5.63 (d, 0.6H, *J* = 1.9 Hz, =CHH), 5.25 (d, 0.4H, *J* = 1.6 Hz, =CHH), 5.17 (d, 0.4H, *J* = 1.6 Hz, =CHH), 3.69 (s, 1.8H, NMe), 3.68 (s, 1.2H, NMe), 2.17 (d, 1.2H, *J* = 1.6 Hz, Me), 2.01 (m, 1.8H, Me); <sup>13</sup>C NMR (75 MHz, CDCl<sub>3</sub>, 25 °C): δ = 143.1 (1C), 141.4 (1C), 139.5 (1C), 137.4 (M), 136.9 (m), 133.3 (M), 126.2 (m), 126.0 (M), 123.8 (Ar, CH M), 123.4 (Ar, CH m), 121.0 (Ar, CH M), 120.9 (Ar, CH m), 119.4 (Ar, CH M), 118.4 (Ar, CH M), 118.3 (Ar, CH m), 118.2 (Ar, CH m), 118.2 (Ar, CH m), 117.0 (=CH<sub>2</sub> m), 116.2 (=CH<sub>2</sub> M), 111.6 (m), 110.8 (=CH m), 110.7 (=CH M), 31.2 (NMe), 23.2 (Me m), 17.3 (Me M); IR (CHCl<sub>3</sub>): ν = 1592, 1465, 1326, 741 cm<sup>-1</sup>; HRMS (ES): calcd for C<sub>14</sub>H<sub>14</sub>ClNO [*M*]<sup>+</sup>: 247.0764; found: 247.0760.

**Dihydrofuran 5a.** Colorless oil; <sup>1</sup>H NMR (300 MHz, CDCl<sub>3</sub>, 25 °C): δ = 7.53 (dt, 1H, *J* = 7.6, 1.0 Hz, Ar), 7.48 (d, 1H, *J* = 8.3 Hz, Ar), 7.27 (td, 1H, *J* = 7.5, 1.2 Hz, Ar), 7.15 (td, 1H, *J* = 7.5, 1.0 Hz, Ar), 6.11 (m, 1H, =CH), 5.87 (m, 1H, OCH), 4.84 (m, 1H, OCHH), 4.73 (m, 1H, OCHH), 3.75 (s, 3H, NMe), 1.60 (q, 3H, *J* = 1.5 Hz, Me); <sup>13</sup>C NMR (75 MHz, CDCl<sub>3</sub>, 25 °C): δ = 136.6, 135.5, 131.9, 127.8, 123.9 (Ar, CH), 123.2 (Ar, CH), 120.9 (Ar, CH), 118.5 (Ar, CH), 110.5 (=CH), 91.8, 82.3 (OCH), 75.5 (OCH<sub>2</sub>), 29.8 (NMe), 12.2 (Me); IR (CHCl<sub>3</sub>): ν = 1739, 1467, 1062, 742 cm<sup>-1</sup>; HRMS (ES): calcd for C<sub>14</sub>H<sub>14</sub>ClNO [*M*]<sup>+</sup>: 247.0764; found: 247.0760.

**Reaction of bromo-allenol 2.** From 64 mg (0.22 mmol) of allenol **2**, and after chromatography of the residue using hexanes/ethyl acetate (20:1) as eluent, 12 mg (18%) of the less polar compound **6b** and 1 mg (2%) of the more polar compound **5b** were obtained.



**Diene 6b.** Colorless oil (diastereomeric mixture 60:40);  $^1\text{H}$  NMR (300 MHz,  $\text{CDCl}_3$ , 25 °C):  $\delta$  = 8.06 (d, 0.4H,  $J$  = 7.7 Hz, Ar), 7.98 (d, 0.6H,  $J$  = 7.9 Hz, Ar), 7.58 (d, 0.6H,  $J$  = 7.9 Hz, Ar), 7.53 (d, 0.4H,  $J$  = 7.7 Hz, Ar), 7.46 (td, 0.6H,  $J$  = 7.7, 1.2 Hz, Ar), 7.40 (t, 0.6H,  $J$  = 8.0 Hz, Ar), 7.18 (m, 0.4H, Ar), 7.08 (d, 0.4H,  $J$  = 7.9 Hz, Ar), 6.95 (s, 0.6H, =CH), 6.30 (d, 0.4H,  $J$  = 1.5 Hz, =CH), 6.13 (d, 0.6H,  $J$  = 2.0 Hz, =CHH), 5.87 (d, 0.6H,  $J$  = 1.9 Hz, =CHH), 5.50 (d, 0.4H,  $J$  = 1.7 Hz, =CHH), 5.46 (d, 0.4H,  $J$  = 1.9 Hz, =CHH), 3.68 (s, 1.8H, NMe), 3.68 (s, 1.2H, NMe), 2.23 (d, 1.2H,  $J$  = 1.6 Hz, Me), 2.05 (d, 1.8H,  $J$  = 0.9 Hz, Me);  $^{13}\text{C}$  NMR (75 MHz,  $\text{CDCl}_3$ , 25 °C):  $\delta$  = 143.8 (m), 139.9 (M), 136.9 (m), 134.4 (M), 132.7 (C), 129.1 (M), 125.1 (C), 122.9 (Ar, CH M), 122.6 (Ar, CH m), 121.9 (Ar, CH M), 121.0 (=CH<sub>2</sub> m), 120.3 (Ar, CH M), 120.2 (Ar, CH m), 119.9 (=CH<sub>2</sub> M), 119.5 (Ar, CH M), 119.2 (Ar, CH m), 118.7 (C), 117.5 (Ar, CH m), 109.6 (=CH m), 109.4 (=CH M), 108.5 (m), 31.1 (NMe), 23.7 (Me m), 17.2 (Me M); IR ( $\text{CHCl}_3$ ):  $\nu$  = 1602, 1467, 1264, 740  $\text{cm}^{-1}$ ; HRMS (ES): calcd for  $\text{C}_{14}\text{H}_{14}\text{BrNO}$  [ $M$ ]<sup>+</sup>: 291.0259; found: 291.0251.

**General procedure for the gold-catalyzed iodine recycling reaction of  $\alpha$ -allenols 3a–e.**

**Synthesis of iodocarbazoles 8a–e.**  $[(\text{Ph}_3\text{P})\text{AuNTf}_2]$  (0.05 mmol) was added to a stirred solution of the corresponding allenol **3** (1.0 mmol) in 1,2-dichloroethane (13.0 mL) under argon. The resulting mixture was stirred at room temperature until disappearance of the starting material (TLC). After filtration through a pad of Celite, the mixture was extracted with ethyl acetate (3 x 5 mL), and the combined extracts were washed twice with brine. The organic layer was dried ( $\text{MgSO}_4$ ) and concentrated under reduced pressure. Chromatography of the residue eluting with ethyl acetate/hexanes mixtures gave analytically pure adducts **8**.

**Reaction of iodo-allenol 3a.** From 122 mg (0.36 mmol) of allenol **3a**, and after chromatography of the residue using hexanes/ethyl acetate (20:1) as eluent, 5 mg (7%) of the less polar compound **7a** and 80 mg (69%) of the more polar compound **8a** were obtained.

**Carbazole 7a.** Described in Alcaide, B.; Almendros, P.; Alonso, J. M.; Quirós, M. T.; Gadziński, P. *Adv. Synth. Catal.* **2011**, *353*, 1871.

**Iodocarbazole 8a.** Yellow solid; mp 98–99 °C;  $^1\text{H}$  NMR (300 MHz,  $\text{CDCl}_3$ , 25 °C):  $\delta$  = 8.48 (s, 1H, Ar), 7.98 (d, 1H,  $J$  = 7.7 Hz, Ar), 7.45 (t, 1H,  $J$  = 7.1 Hz, Ar), 7.33 (d, 1H,  $J$  = 8.1 Hz, Ar), 7.24 (s, 1H, Ar), 7.21 (t, 1H,  $J$  = 7.4 Hz, Ar), 3.76 (s, 3H, NMe), 2.61 (s, 3H, Me);  $^{13}\text{C}$  NMR (75 MHz,  $\text{CDCl}_3$ , 25 °C):  $\delta$  = 141.3, 141.0, 137.6, 130.2 (Ar, CH), 125.9 (Ar, CH), 123.1, 121.4, 120.1 (Ar, CH), 119.2 (Ar, CH), 109.3 (Ar, CH), 108.5 (Ar, CH), 88.7, 29.1 (NMe), 29.0 (Me); IR ( $\text{CHCl}_3$ ):  $\nu$  = 1597, 1450, 1253, 743  $\text{cm}^{-1}$ ; HRMS (ES): calcd for  $\text{C}_{14}\text{H}_{12}\text{IN}$  [ $M$ ] $^+$ : 321.0014; found: 321.0019.

**Reaction of iodo-allenol 3b.** From 283 mg (0.80 mmol) of allenol **3b**, and after chromatography of the residue using hexanes/ethyl acetate (20:1) as eluent, 64 mg (38%) of the less polar compound **7b** and 112 mg (41%) of the more polar compound **8b** were obtained.

**Carbazole 7b.** Colorless oil;  $^1\text{H}$  NMR (300 MHz,  $\text{CDCl}_3$ , 25 °C):  $\delta$  = 8.11 (d, 1H,  $J$  = 7.7 Hz, Ar), 8.05 (d, 1H,  $J$  = 7.9 Hz, Ar), 7.50 (t, 1H,  $J$  = 7.6 Hz, Ar), 7.42 (d, 1H,  $J$  = 8.0 Hz, Ar), 7.30 (s, 1H, Ar), 7.27 (t, 1H,  $J$  = 7.6 Hz, Ar), 7.15 (d, 1H,  $J$  = 8.0 Hz, Ar), 3.88 (s, 3H, NMe), 2.92 (q, 2H,  $J$  = 7.6 Hz,  $\text{CH}_2$ ), 1.42 (t, 3H,  $J$  = 7.6 Hz, Me);  $^{13}\text{C}$  NMR (75 MHz,  $\text{CDCl}_3$ , 25 °C):  $\delta$  = 142.4, 141.4, 141.0, 125.1 (Ar, CH), 122.8, 120.7, 120.0 (Ar, CH), 119.9 (Ar, CH), 119.3 (Ar, CH), 118.7 (Ar, CH), 108.3 (Ar, CH), 107.4 (Ar, CH), 29.7 ( $\text{CH}_2$ ), 29.0 (NMe), 16.2 (Me); IR ( $\text{CHCl}_3$ ):  $\nu$  = 1603, 1455, 1322, 744, 725  $\text{cm}^{-1}$ ; HRMS (ES): calcd for  $\text{C}_{15}\text{H}_{15}\text{N}$  [ $M$ ] $^+$ : 209.1204; found: 209.1208.

**Iodocarbazole 8b.** Pale brown solid; mp 114–115 °C;  $^1\text{H}$  NMR (300 MHz,  $\text{CDCl}_3$ , 25 °C):  $\delta$  = 8.50 (s, 1H, Ar), 7.99 (dd, 1H,  $J$  = 7.9, 0.8 Hz, Ar), 7.47 (td, 1H,  $J$  = 8.0, 1.2 Hz, Ar), 7.35 (d, 1H,  $J$  = 8.1 Hz, Ar), 7.26 (s, 1H, Ar), 7.23 (td, 1H,  $J$  = 7.9, 1.0 Hz, Ar), 3.80 (s, 3H, NMe), 2.93 (q, 2H,  $J$  = 7.5 Hz,  $\text{CH}_2$ ), 1.33 (t, 3H,  $J$  = 7.4 Hz, Me);  $^{13}\text{C}$  NMR (75 MHz,  $\text{CDCl}_3$ , 25 °C):  $\delta$  = 143.0, 141.4, 141.1, 130.7 (Ar, CH), 125.9 (Ar, CH), 123.2, 121.4, 120.2 (Ar, CH), 119.2 (Ar, CH), 108.5 (Ar, CH), 108.1 (Ar, CH), 88.0, 34.9 ( $\text{CH}_2$ ), 29.0 (NMe), 15.2 (Me); IR ( $\text{CHCl}_3$ ):  $\nu$  = 1598, 1450, 1252, 742, 723  $\text{cm}^{-1}$ ; HRMS (ES): calcd for  $\text{C}_{15}\text{H}_{14}\text{IN}$  [ $M$ ] $^+$ : 335.0171; found: 335.0185.

**Reaction of iodo-allenol 3c.** From 170 mg (0.42 mmol) of allenol **3c**, and after chromatography of the residue using hexanes/ethyl acetate (20:1) as eluent, 36 mg (33%) of the less polar compound **7c** and 58 mg (36%) of the more polar compound **8c** were obtained.

**Carbazole 7c.** Described in Alcaide, B.; Almendros, P.; Alonso, J. M.; Quirós, M. T.; Gadziński, P. *Adv. Synth. Catal.* **2011**, *353*, 1871.

**Iodocarbazole 8c.** Pale brown solid; mp 124–125 °C; <sup>1</sup>H NMR (300 MHz, CDCl<sub>3</sub>, 25 °C): δ = 8.64 (s, 1H, Ar), 8.08 (d, 1H, *J* = 7.9 Hz, Ar), 7.52 (t, 1H, *J* = 7.7 Hz, Ar), 7.45 (m, 6H, Ar), 7.38 (s, 1H, Ar), 7.27 (t, 1H, *J* = 7.9 Hz, Ar), 3.83 (s, 3H, NMe); <sup>13</sup>C NMR (75 MHz, CDCl<sub>3</sub>, 25 °C): δ = 145.2, 143.1, 141.4, 132.6, 130.8 (Ar, CH), 129.7 (Ar, 2CH), 127.8 (Ar, 2CH), 127.5 (Ar, CH), 126.4 (Ar, CH), 123.3, 121.3, 120.5 (Ar, CH), 119.5 (Ar, CH), 110.0 (Ar, CH), 108.7 (Ar, CH), 86.0, 29.1 (NMe), 29.1 (Me); IR (CHCl<sub>3</sub>): ν = 1596, 1449, 1251, 744, 699 cm<sup>-1</sup>; HRMS (ES): calcd for C<sub>19</sub>H<sub>14</sub>IN [M]<sup>+</sup>: 383.0171; found: 383.0187.

**Reaction of iodo-allenol 3d.** From 98 mg (0.27 mmol) of allenol **3d**, and after chromatography of the residue using hexanes/ethyl acetate (20:1) as eluent, 6 mg (10%) of the less polar compound **7d** and 43 mg (46%) of the more polar compound **8d** were obtained.

**Carbazole 7d.** Pale brown solid; mp 121–122 °C; <sup>1</sup>H NMR (300 MHz, CDCl<sub>3</sub>, 25 °C): δ = 7.93 (d, 1H, *J* = 7.7 Hz, Ar), 7.55 (d, 1H, *J* = 2.5 Hz, Ar), 7.28 (d, 1H, *J* = 8.2 Hz, Ar), 7.17 (s, 1H, Ar), 7.09 (dd, 1H, *J* = 8.8, 2.5 Hz, Ar), 7.03 (d, 1H, *J* = 7.9 Hz, Ar), 3.94 (s, 3H, OMe), 3.80 (s, 3H, NMe), 2.57 (s, 3H, Me); <sup>13</sup>C NMR (75 MHz, CDCl<sub>3</sub>, 25 °C): δ = 153.5, 141.9, 136.1, 135.8, 123.1, 120.3, 119.9 (Ar, CH), 119.9 (Ar, CH), 115.4 (Ar, CH), 108.9 (Ar, CH), 108.7 (Ar, CH), 103.2 (Ar, CH), 56.1 (OMe), 29.1 (NMe), 22.3 (Me); IR (CHCl<sub>3</sub>): ν = 1488, 1288, 1206, 804 cm<sup>-1</sup>; HRMS (ES): calcd for C<sub>15</sub>H<sub>15</sub>NO [M]<sup>+</sup>: 225.1154; found: 225.1160.

**Iodocarbazole 8d.** Pale brown solid; mp 136–137 °C;  $^1\text{H}$  NMR (300 MHz,  $\text{CDCl}_3$ , 25 °C):  $\delta$  = 8.45 (s, 1H, Ar), 7.48 (d, 1H,  $J$  = 2.5 Hz, Ar), 7.26 (d, 1H,  $J$  = 8.9 Hz, Ar), 7.25 (s, 1H, Ar), 7.11 (dd, 1H,  $J$  = 8.9, 2.5 Hz, Ar), 3.93 (s, 3H, OMe), 3.75 (s, 3H, NMe), 2.62 (s, 3H, Me);  $^{13}\text{C}$  NMR (75 MHz,  $\text{CDCl}_3$ , 25 °C):  $\delta$  = 153.7, 141.7, 137.5, 136.1, 130.1 (Ar, CH), 122.9, 121.6, 115.0 (Ar, CH), 109.4 (Ar, CH), 109.2 (Ar, CH), 103.0 (Ar, CH), 56.0 (OMe), 29.1 (NMe), 29.0 (Me); IR ( $\text{CHCl}_3$ ):  $\nu$  = 1487, 1289, 1205, 1167, 838  $\text{cm}^{-1}$ ; HRMS (ES): calcd for  $\text{C}_{15}\text{H}_{14}\text{INO}$  [ $M$ ] $^+$ : 351.0120; found: 351.0107. X-ray data of **8d**: crystallized from ethyl acetate/*n*-hexane at 20 °C;  $\text{C}_{15}\text{H}_{14}\text{INO}$  ( $M_r$  = 351.17); monoclinic; space group =  $P2(1)$ ;  $a$  = 6.2989(9) Å,  $b$  = 11.262(2) Å;  $c$  = 9.742(1) Å;  $\alpha$  = 90°;  $\beta$  = 103.974(2)°;  $\gamma$  = 90°;  $V$  = 674.2(2) Å $^3$ ;  $Z$  = 2;  $\text{cd}$  = 1.730  $\text{mg m}^{-3}$ ;  $\mu$  = 2.362  $\text{mm}^{-1}$ ;  $F(000)$  = 344. A transparent crystal of 0.18 x 0.14 x 0.05  $\text{mm}^3$  was used. 2303 ( $R_{\text{int}}$  = 0.0364) independent reflections were collected on a Bruker Smart CCD diffractometer using graphite-monochromated Mo- $K\alpha$  radiation ( $\lambda$  = 0.71073 Å) operating at 50 Kv and 35 mA. Data were collected over a hemisphere of the reciprocal space by combination of three exposure sets. Each exposure of 20s covered 0.3 in  $\omega$ . The cell parameter were determined and refined by a least-squares fit of all reflections. The first 100 frames were recollected at the end of the data collection to monitor crystal decay, and no appreciable decay was observed. The structure was solved by direct methods and Fourier synthesis. It was refined by full-matrix least-squares procedures on  $F^2$  (SHELXL-97). All non-hydrogen atoms were refined anisotropically. All hydrogen atoms were included in calculated positions and refined riding on the respective carbon atoms. Final  $R(R_w)$  values were  $R^a$  = 0.0284,  $R_w^b$  = 0.0721. CCDC-926119 contains the supplementary crystallographic data for this paper. These data can be obtained free of charge via the [www.ccdc.cam.ac.uk/deposit](http://www.ccdc.cam.ac.uk/deposit) (or from The Cambridge Crystallographic Data Centre, 12 Union Road, Cambridge CB21EZ, UK; Fax (+44)1223-336033; or [deposit@ccdc.cam.ac.uk](mailto:deposit@ccdc.cam.ac.uk)).

**Reaction of iodo-allenol 3e.** From 192 mg (0.51 mmol) of allenol **3e**, and after chromatography of the residue using hexanes/ethyl acetate (20:1) as eluent, 33 mg (28%) of the less polar compound **7e**, 40

mg (21%) of the intermediate polar compound **9e**, and 51 mg (28%) of the more polar compound **8e** were obtained.

**Carbazole 7e.** Colorless oil;  $^1\text{H}$  NMR (300 MHz,  $\text{CDCl}_3$ , 25 °C):  $\delta$  = 8.00 (d, 1H,  $J$  = 2.0 Hz, Ar), 7.92 (d, 1H,  $J$  = 7.92 Hz, Ar), 7.39 (dd, 1H,  $J$  = 8.6, 2.0 Hz, Ar), 7.29 (d, 1H,  $J$  = 8.6 Hz, Ar), 7.20 (s, 1H, Ar), 7.08 (d, 1H,  $J$  = 7.9 Hz, Ar), 3.82 (s, 3H, NMe), 2.58 (s, 3H, Me);  $^{13}\text{C}$  NMR (75 MHz,  $\text{CDCl}_3$ , 25 °C):  $\delta$  = 141.8, 139.2, 136.6, 125.0 (Ar, CH), 124.1, 123.8, 120.7 (Ar, CH), 120.1 (Ar, CH), 119.6 (Ar, CH), 119.5, 118.7 (Ar, CH), 109.2 (Ar, CH), 108.8 (Ar, CH), 29.0 (NMe), 22.3 (Me); IR ( $\text{CHCl}_3$ ):  $\nu$  = 1467, 1273, 1074, 803  $\text{cm}^{-1}$ ; HRMS (ES): calcd for  $\text{C}_{14}\text{H}_{12}\text{ClN}$  [ $M$ ] $^+$ : 229.0658; found: 229.0649.

**Iodocarbazole 8e.** Orange solid; mp 147–148 °C;  $^1\text{H}$  NMR (300 MHz,  $\text{CDCl}_3$ , 25 °C):  $\delta$  = 8.43 (s, 1H, Ar), 7.93 (d, 1H,  $J$  = 1.9 Hz, Ar), 7.41 (dd, 1H,  $J$  = 8.6, 2.0 Hz, Ar), 7.27 (s, 1H, Ar), 7.26 (d, 1H,  $J$  = 8.6 Hz, Ar), 3.76 (s, 3H, NMe), 2.64 (s, 3H, Me);  $^{13}\text{C}$  NMR (75 MHz,  $\text{CDCl}_3$ , 25 °C):  $\delta$  = 141.6, 139.3, 138.5, 130.4 (Ar, CH), 125.8 (Ar, CH), 124.7, 122.4, 122.1, 119.8 (Ar, CH), 109.5 (Ar, CH), 109.4 (Ar, CH), 89.0, 29.1 (NMe), 29.1 (Me); IR ( $\text{CHCl}_3$ ):  $\nu$  = 1488, 1277, 796  $\text{cm}^{-1}$ ; HRMS (ES): calcd for  $\text{C}_{14}\text{H}_{11}\text{ClIN}$  [ $M$ ] $^+$ : 354.9625; found: 354.9634.

**Iododihydrocarbazole 9e.** Pale brown solid; mp 116–117 °C;  $^1\text{H}$  NMR (300 MHz,  $\text{CDCl}_3$ , 25 °C):  $\delta$  = 7.44 (m, 1H, Ar), 7.22 (m, 2H, Ar), 6.11 (t, 1H,  $J$  = 5.0 Hz, OCH), 4.79 (m, 2H,  $\text{CH}_2$ ), 3.68 (s, 3H, NMe), 1.62 (t, 3H,  $J$  = 1.1 Hz, Me);  $^{13}\text{C}$  NMR (75 MHz,  $\text{CDCl}_3$ , 25 °C):  $\delta$  = 182.1, 167.5, 140.6, 137.3, 136.0, 130.6, 126.3, 123.9 (Ar, CH), 121.2 (Ar, CH), 110.5 (Ar, CH), 84.5 (OCH), 81.5 ( $\text{CH}_2$ ), 30.5 (NMe), 14.2 (Me); IR ( $\text{CHCl}_3$ ):  $\nu$  = 1469, 1067, 989, 859, 792  $\text{cm}^{-1}$ ; HRMS (ES): calcd for  $\text{C}_{14}\text{H}_{13}\text{ClINO}$  [ $M$ ] $^+$ : 372.9730; found: 372.9712.

**General procedure for the palladium-catalyzed iodine recycling reaction of  $\alpha$ -allenols 3a, 3f, 3g, and 3h. Synthesis of iodocarbazoles 8a, 8f, 8g, and 8h.** CuI (5 mol%) and  $\text{Pd}(\text{PPh}_3)_2\text{Cl}_2$  (5 mol%) were sequentially added to a solution of the corresponding iodoindole **3** (1.0 mmol) in DMF (33 mL). The mixture was heated to 70 °C, and stirred overnight. After total consumption of the starting material, the

mixture was diluted with AcOEt and washed with water, washed with brine and dried over MgSO<sub>4</sub>. After filtration, the solvent was evaporated under reduced pressure, and the crude mixture was purified on column chromatography, yielding analytically pure adducts **8**.

**Iodocarbazole 8a.** From 100 mg (0.295 mmol) of allenol **3a**, and after chromatography of the residue using hexanes/ethyl acetate (8:1) as eluent gave compound **8a** (57 mg, 61%) as a yellow solid; mp 98–99 °C; <sup>1</sup>H NMR (300 MHz, CDCl<sub>3</sub>, 25 °C): δ = 8.48 (s, 1H, Ar), 7.98 (d, 1H, *J* = 7.7 Hz, Ar), 7.45 (t, 1H, *J* = 7.1 Hz, Ar), 7.33 (d, 1H, *J* = 8.1 Hz, Ar), 7.24 (s, 1H, Ar), 7.21 (t, 1H, *J* = 7.4 Hz, Ar), 3.76 (s, 3H, NMe), 2.61 (s, 3H, Me); <sup>13</sup>C NMR (75 MHz, CDCl<sub>3</sub>, 25 °C): δ = 141.3, 141.0, 137.6, 130.2 (Ar, CH), 125.9 (Ar, CH), 123.1, 121.4, 120.1 (Ar, CH), 119.2 (Ar, CH), 109.3 (Ar, CH), 108.5 (Ar, CH), 88.7, 29.1 (NMe), 29.0 (Me); IR (CHCl<sub>3</sub>): ν = 1597, 1450, 1253, 743 cm<sup>-1</sup>; HRMS (ES): calcd for C<sub>14</sub>H<sub>12</sub>IN [M]<sup>+</sup>: 321.0014; found: 321.0019.

**Iodocarbazole 8e.** From 40 mg (0.167 mmol) of allenol **3e**, and after chromatography of the residue using hexanes/ethyl acetate (5:1) as eluent gave compound **8e** (30 mg, 50%) as an orange solid; mp 147–148 °C; <sup>1</sup>H NMR (300 MHz, CDCl<sub>3</sub>, 25 °C): δ = 8.43 (s, 1H, Ar), 7.93 (d, 1H, *J* = 1.9 Hz, Ar), 7.41 (dd, 1H, *J* = 8.6, 2.0 Hz, Ar), 7.27 (s, 1H, Ar), 7.26 (d, 1H, *J* = 8.6 Hz, Ar), 3.76 (s, 3H, NMe), 2.64 (s, 3H, Me); <sup>13</sup>C NMR (75 MHz, CDCl<sub>3</sub>, 25 °C): δ = 141.6, 139.3, 138.5, 130.4 (Ar, CH), 125.8 (Ar, CH), 124.7, 122.4, 122.1, 119.8 (Ar, CH), 109.5 (Ar, CH), 109.4 (Ar, CH), 89.0, 29.1 (NMe), 29.1 (Me); IR (CHCl<sub>3</sub>): ν = 1488, 1277, 796 cm<sup>-1</sup>; HRMS (ES): calcd for C<sub>14</sub>H<sub>11</sub>ClIN [M]<sup>+</sup>: 354.9625; found: 354.9634.

**Iodocarbazole 8f.** From 50 mg (0.154 mmol) of allenol **3f**, and after chromatography of the residue using hexanes/ethyl acetate (3:1) as eluent gave compound **8f** (24 mg, 52%) as a yellow oil; <sup>1</sup>H NMR (300 MHz, CDCl<sub>3</sub>, 25 °C): δ = 8.42 (1H, s, Ar), 7.89 (1H, d, *J* = 8.1 Hz, Ar), 7.87 (1H, s, NH), 7.32 (2H, m, Ar), 7.26 (1H, m, Ar), 7.15 (1H, m, Ar), 2.51 (1H, s, Me); <sup>13</sup>C NMR (75 MHz, CDCl<sub>3</sub>, 25 °C): δ = 139.8 (1C, C Ar), 139.5 (1C, C Ar), 137.9 (1C, C Ar), 130.4 (1C, CH Ar), 126.1 (1C, CH Ar), 123.8 (1C, C Ar), 122.0 (1C, C Ar), 120.2 (1C, CH Ar), 119.8 (1C, CH Ar), 111.3 (1C, CH Ar), 110.6 (1C, CH Ar),

89.4 (1C, C Ar), 28.9 (1C, Me); IR (CHCl<sub>3</sub>):  $\nu = 1469, 1249, 701 \text{ cm}^{-1}$ ; HRMS (ES): calcd for C<sub>13</sub>H<sub>10</sub>IN [M]<sup>+</sup>: 306.9858; found: 306.9854.

**Iodocarbazole 8h.** From 100 mg (0.282 mmol) of allenol **3h**, and after chromatography of the residue using hexanes/ethyl acetate (5:1) as eluent gave compound **8h** (70 mg, 75%) as a yellow oil; <sup>1</sup>H NMR (300 MHz, CDCl<sub>3</sub>, 25 °C):  $\delta = 8.36$  (1H, s, Ar), 7.72 (1H, s, NH), 7.37 (1H, d,  $J = 2.4$  Hz, Ar), 7.20 (2H, d,  $J = 2.9$  Hz, Ar), 7.18 (1H, s, Ar), 6.95 (1H, dd,  $J = 8.7, 2.4$  Hz, Ar), 3.82 (3H, s, OMe), 2.48 (1H, s, Me); <sup>13</sup>C NMR (75 MHz, CDCl<sub>3</sub>, 25 °C):  $\delta = 154.1$  (1C, C Ar), 140.5 (1C, C Ar), 137.7 (1C, Ar), 134.4 (1C, C Ar), 130.3 (1C, CH Ar), 123.8 (1C, C Ar), 122.5 (1C, C Ar), 115.3 (1C, CH Ar), 111.5 (1C, CH Ar), 111.4 (1C, CH Ar), 102.9 (1C, CH Ar), 88.9 (1C, C-I Ar), 56.0 (1C, OMe), 28.9 (1C, Me); IR (CHCl<sub>3</sub>):  $\nu = 1469, 1249, 701 \text{ cm}^{-1}$ ; HRMS (ES): calcd for C<sub>14</sub>H<sub>12</sub>INO [M]<sup>+</sup>: 336.9964; found: 336.9955.

**General procedure for the gold-catalyzed reaction of 3-phenoxy-(indol-2-yl)- $\alpha$ -allenols 4a–c.**

**Synthesis of 2,5-dihydrofuran 5c and 1-oxygenated carbazoles 10a,b.** [(Ph<sub>3</sub>P)AuNTf<sub>2</sub>] (0.035 mmol) was added to a stirred solution of the corresponding allene **4** (0.7 mmol) in 1,2-dichloroethane (9.0 mL) under argon. The resulting mixture was stirred at room temperature until disappearance of the starting material (TLC). After filtration through a pad of Celite, the mixture was extracted with ethyl acetate (3 x 4 mL), and the combined extracts were washed twice with brine. The organic layer was dried (MgSO<sub>4</sub>) and concentrated under reduced pressure. Chromatography of the residue eluting with ethyl acetate/hexanes mixtures gave analytically pure adducts **5c** or **10**.

**Dihydrofuran 5c.** From 285 mg (0.78 mmol) of allene **4c**, and after chromatography of the residue using hexanes/ethyl acetate (20:1) as eluent gave compound **5c** (129 mg, 46%) as a yellow oil; <sup>1</sup>H NMR (300 MHz, CDCl<sub>3</sub>, 25 °C):  $\delta = 7.35$  (m, 3H, Ar), 7.30 (m, 2H, Ar), 7.23 (m, 3H, Ar), 7.20 (m, 2H, Ar), 7.03 (d, 2H,  $J = 7.2$  Hz, Ar), 7.02 (m, 1H, Ar), 6.99 (t, 1H,  $J = 7.5$  Hz, Ar), 6.63 (td, 1H,  $J = 5.4, 2.3$  Hz, =CH), 6.35 (q, 1H,  $J = 2.1$  Hz, OCH), 4.91 (d, 2H,  $J = 5.6$  Hz, OCH<sub>2</sub>), 3.76 (s, 3H, NMe); <sup>13</sup>C NMR (75 MHz, CDCl<sub>3</sub>, 25 °C):  $\delta = 159.2, 139.4, 135.4, 132.3, 132.2, 129.3$  (Ar, 2CH), 128.5 (Ar, 2CH), 128.2, 128.0 (Ar, CH), 126.1 (Ar, 2CH), 123.1 (Ar, CH), 122.5 (Ar, CH), 121.6 (Ar, CH), 119.7, 119.1 (Ar, CH),



118.5 (Ar, CH), 115.6 (Ar, 2CH), 109.1 (=CH), 78.2 (OCH), 75.1 (OCH<sub>2</sub>), 29.8 (NMe); IR (CHCl<sub>3</sub>):  $\nu = 2850, 1469, 1370, 1213, 743 \text{ cm}^{-1}$ ; HRMS (ES): calcd for C<sub>25</sub>H<sub>21</sub>NO<sub>2</sub> [M]<sup>+</sup>: 367.1572; found: 367.1574.

**1-Hydroxycarbazole 10a.** From 108 mg (0.35 mmol) of allene **4a**, and after chromatography of the residue using hexanes/ethyl acetate (12:1) as eluent gave compound **10a** (43 mg, 57%) as a yellow solid; mp 128–129 °C; <sup>1</sup>H NMR (300 MHz, CDCl<sub>3</sub>, 25 °C):  $\delta = 8.03$  (d, 1H,  $J = 7.7$  Hz, Ar), 7.61 (d, 1H,  $J = 7.9$  Hz, Ar), 7.46 (t, 1H,  $J = 8.1$  Hz, Ar), 7.38 (d, 1H,  $J = 8.1$  Hz, Ar), 7.21 (t, 1H,  $J = 7.9$  Hz, Ar), 6.97 (d, 1H,  $J = 7.9$  Hz, Ar), 4.70 (br s, 1H, OH), 4.19 (s, 3H, NMe), 2.45 (s, 3H, Me); <sup>13</sup>C NMR (75 MHz, CDCl<sub>3</sub>, 25 °C):  $\delta = 141.7, 140.2, 129.8, 125.3$  (Ar, CH), 123.9, 123.0, 121.5 (Ar, CH), 119.9 (Ar, CH), 118.9, 118.7 (Ar, CH), 112.6 (Ar, CH), 108.6 (Ar, CH), 31.9 (NMe), 15.6 (Me); IR (CHCl<sub>3</sub>):  $\nu = 3425, 1640, 1400, 1264, 734, 702 \text{ cm}^{-1}$ ; HRMS (ES): calcd for C<sub>14</sub>H<sub>13</sub>NO [M]<sup>+</sup>: 211.0997; found: 211.0998.

**1-Methoxycarbazole 10b.** From 60 mg (0.19 mmol) of allene **4b**, and after chromatography of the residue using hexanes/ethyl acetate (20:1) as eluent gave compound **10b** (22 mg, 51%) as an orange solid; mp 131–132 °C; <sup>1</sup>H NMR (300 MHz, CDCl<sub>3</sub>, 25 °C):  $\delta = 8.28$  (d, 1H,  $J = 7.9$  Hz, Ar), 7.48 (t, 1H,  $J = 7.0$  Hz, Ar), 7.39 (d, 1H,  $J = 8.0$  Hz, Ar), 7.28 (m, 1H, Ar), 7.26 (m, 1H, Ar), 7.10 (d, 1H,  $J = 8.2$  Hz, Ar), 4.02 (s, 3H, NMe), 3.84 (s, 3H, OMe), 2.47 (s, 3H, Me); <sup>13</sup>C NMR (75 MHz, CDCl<sub>3</sub>, 25 °C):  $\delta = 153.7, 141.5, 140.8, 128.7$  (Ar, CH), 125.2 (Ar, CH), 122.7 (Ar, CH), 121.1, 120.3, 119.0 (Ar, CH), 115.5, 108.1 (Ar, CH), 104.3 (Ar, CH), 59.9 (OMe), 29.2 (NMe), 15.1 (Me); IR (CHCl<sub>3</sub>):  $\nu = 2927, 1471, 1285, 747, 737 \text{ cm}^{-1}$ ; HRMS (ES): calcd for C<sub>15</sub>H<sub>15</sub>NO [M]<sup>+</sup>: 225.1154; found: 225.1153.

## Computational Details

All the calculations reported in this paper were obtained with the GAUSSIAN 09 suite of programs.<sup>1</sup> Electron correlation was partially taken into account using the hybrid functional usually denoted as B3LYP<sup>2</sup> using the double- $\zeta$  quality plus polarization def2-SVP basis set<sup>3</sup> for all atoms. Reactants and products were characterized by frequency calculations,<sup>4</sup> and have positive definite Hessian matrices. Transition structures (TS's) show only one negative eigenvalue in their diagonalized force constant matrices, and their associated eigenvectors were confirmed to correspond to the motion along the reaction coordinate under consideration using the Intrinsic Reaction Coordinate (IRC) method.<sup>5</sup> Solvents effects were taken into account using the Polarizable Continuum Model (PCM).<sup>6</sup> Single point calculations (PCM-M06/def2-SVP) on the gas-phase optimized geometries were performed to estimate the change in the Gibbs energies in the presence of dichloroethane as solvent using the dispersion corrected M06<sup>7</sup> functional. This level is denoted PCM-M06/def2-SVP//B3LYP/def2-SVP.

---

<sup>1</sup> Gaussian 09, Revision B.01, Frisch, M. J.; Trucks, G. W.; Schlegel, H. B.; Scuseria, G. E.; Robb, M. A.; Cheeseman, J. R.; Scalmani, G.; Barone, V.; Mennucci, B.; Petersson, G. A.; Nakatsuji, H.; Caricato, M.; Li, X.; Hratchian, H. P.; Izmaylov, A. F.; Bloino, J.; Zheng, G.; Sonnenberg, J. L.; Hada, M.; Ehara, M.; Toyota, K.; Fukuda, R.; Hasegawa, J.; Ishida, M.; Nakajima, T.; Honda, Y.; Kitao, O.; Nakai, H.; Vreven, T.; Montgomery, Jr., J. A.; Peralta, J. E.; Ogliaro, F.; Bearpark, M.; Heyd, J. J.; Brothers, E.; Kudin, K. N.; Staroverov, V. N.; Kobayashi, R.; Normand, J.; Raghavachari, K.; Rendell, A.; Burant, J. C.; Iyengar, S. S.; Tomasi, J.; Cossi, M.; Rega, N.; Millam, N. J.; Klene, M.; Knox, J. E.; Cross, J. B.; Bakken, V.; Adamo, C.; Jaramillo, J.; Gomperts, R.; Stratmann, R. E.; Yazyev, O.; Austin, A. J.; Cammi, R.; Pomelli, C.; Ochterski, J. W.; Martin, R. L.; Morokuma, K.; Zakrzewski, V. G.; Voth, G. A.; Salvador, P.; Dannenberg, J. J.; Dapprich, S.; Daniels, A. D.; Farkas, Ö.; Foresman, J. B.; Ortiz, J. V.; Cioslowski, J.; Fox, D. J. *Gaussian, Inc.*, Wallingford CT, 2009.

<sup>2</sup> (a) Becke, A. D. *J. Chem. Phys.* **1993**, *98*, 5648. (b) Lee, C.; Yang, W.; Parr, R. G. *Phys. Rev. B* **1998**, *37*, 785. (c) Vosko, S. H.; Wilk, L.; Nusair, M. *Can. J. Phys.* **1980**, *58*, 1200.

<sup>3</sup> Weigend, F.; Alrichs, R. *Phys. Chem. Chem. Phys.* **2005**, *7*, 3297.

<sup>4</sup> McIver, J. W.; Komornicki, A. K. *J. Am. Chem. Soc.* **1972**, *94*, 2625.

<sup>5</sup> González, C.; Schlegel, H. B. *J. Phys. Chem.* **1990**, *94*, 5523.

<sup>6</sup> (a) Miertuš, S.; Scrocco, E.; Tomasi, J. *Chem. Phys.* **1981**, *55*, 117. (b) Pascual-Ahuir, J. L.; Silla, E.; Tuñón, I. *J. Comp. Chem.* **1994**, *15*, 1127. (c) Barone, V.; Cossi, M. *J. Phys. Chem. A*, **1998**, *102*, 1995.

<sup>7</sup> Y. Zhao, D. G. Truhlar, *Acc. Chem. Res.* **2008**, *41*, 157.

Cartesian coordinates (in Å) and total energies (in a. u., ZPVE included) of all the stationary points discussed in the text. All calculations have been performed at the B3LYP/def2-SVP level of theory.

**3a:** E= -968.897601

|   |              |              |              |
|---|--------------|--------------|--------------|
| C | -2.528262000 | -1.114674000 | 1.500764000  |
| C | -2.934496000 | -0.604830000 | 0.358197000  |
| C | -0.509007000 | -0.478653000 | -0.467527000 |
| C | 1.349594000  | -1.734796000 | -0.244378000 |
| C | 2.282605000  | -2.781718000 | -0.172074000 |
| C | 3.602494000  | -2.454896000 | 0.125681000  |
| C | 3.994428000  | -1.116490000 | 0.349634000  |
| C | 3.071681000  | -0.078635000 | 0.281118000  |
| C | 1.730400000  | -0.380253000 | -0.017597000 |
| H | 1.987293000  | -3.819958000 | -0.336077000 |
| H | 4.349055000  | -3.250473000 | 0.190857000  |
| H | 5.039259000  | -0.896961000 | 0.582556000  |
| H | 3.375407000  | 0.956252000  | 0.456939000  |
| C | -4.397007000 | -0.359021000 | 0.056730000  |
| H | -5.034608000 | -0.658087000 | 0.899717000  |
| H | -4.571974000 | 0.711074000  | -0.151903000 |
| H | -4.701157000 | -0.915620000 | -0.842824000 |
| C | -1.954885000 | -0.147734000 | -0.720297000 |
| H | -2.018975000 | 0.957245000  | -0.741775000 |
| C | 0.530035000  | 0.386618000  | -0.172457000 |
| N | -0.001871000 | -1.772030000 | -0.522572000 |
| C | -0.740789000 | -2.991266000 | -0.796850000 |
| H | -1.687540000 | -2.739246000 | -1.284877000 |
| H | -0.157599000 | -3.629356000 | -1.478872000 |
| H | -0.941917000 | -3.557439000 | 0.127867000  |
| C | -2.144763000 | -1.607743000 | 2.651965000  |
| H | -1.902728000 | -0.956233000 | 3.500088000  |
| H | -2.042201000 | -2.687933000 | 2.810681000  |
| O | -2.418202000 | -0.671604000 | -1.967636000 |
| H | -1.896175000 | -0.261563000 | -2.670880000 |
| I | 0.404725000  | 2.477545000  | 0.036606000  |

**INT1:** E= -1565.340600

|   |              |              |              |
|---|--------------|--------------|--------------|
| C | -0.348606000 | 0.076358000  | 0.476350000  |
| C | -0.016145000 | -0.510593000 | 1.603203000  |
| C | 2.405106000  | 0.168513000  | 1.073692000  |
| C | 3.436374000  | 1.984733000  | 0.226311000  |
| C | 3.892027000  | 3.284186000  | -0.052508000 |
| C | 4.816454000  | 3.435690000  | -1.080843000 |
| C | 5.284075000  | 2.326093000  | -1.821052000 |
| C | 4.835278000  | 1.040679000  | -1.546197000 |
| C | 3.898198000  | 0.857732000  | -0.511401000 |
| H | 3.538071000  | 4.148633000  | 0.512481000  |
| H | 5.190098000  | 4.433988000  | -1.320673000 |
| H | 6.012105000  | 2.485768000  | -2.619526000 |
| H | 5.200678000  | 0.183438000  | -2.116393000 |
| C | -0.970820000 | -1.137121000 | 2.585192000  |
| H | -2.016427000 | -1.054986000 | 2.258825000  |
| H | -0.721765000 | -2.202939000 | 2.716117000  |
| H | -0.852962000 | -0.657553000 | 3.567690000  |
| C | 1.483576000  | -0.650744000 | 1.931909000  |
| H | 1.712595000  | -1.711765000 | 1.709779000  |
| C | 3.227633000  | -0.276465000 | 0.052616000  |
| N | 2.534659000  | 1.551551000  | 1.180475000  |
| C | 1.873115000  | 2.435160000  | 2.124915000  |
| H | 1.413414000  | 1.842801000  | 2.922202000  |

|    |              |              |              |
|----|--------------|--------------|--------------|
| H  | 2.610360000  | 3.112476000  | 2.583283000  |
| H  | 1.103471000  | 3.051983000  | 1.629539000  |
| C  | -0.467475000 | 0.675327000  | -0.725633000 |
| H  | -0.270436000 | 0.109587000  | -1.646635000 |
| H  | -0.461255000 | 1.770522000  | -0.807996000 |
| O  | 1.612123000  | -0.398765000 | 3.320963000  |
| H  | 2.515995000  | -0.619925000 | 3.588013000  |
| Au | -2.652583000 | 0.221351000  | -0.314642000 |
| P  | -4.987888000 | -0.009030000 | -0.396790000 |
| C  | -5.727161000 | -0.470449000 | 1.213814000  |
| H  | -5.491257000 | 0.295159000  | 1.967384000  |
| H  | -6.820668000 | -0.556364000 | 1.114691000  |
| H  | -5.318871000 | -1.435002000 | 1.549388000  |
| C  | -5.530538000 | -1.293175000 | -1.582871000 |
| H  | -6.629728000 | -1.361315000 | -1.590132000 |
| H  | -5.176619000 | -1.041449000 | -2.593410000 |
| H  | -5.108917000 | -2.267818000 | -1.296297000 |
| C  | -5.825524000 | 1.536554000  | -0.908052000 |
| H  | -5.472528000 | 1.840468000  | -1.904455000 |
| H  | -6.915488000 | 1.382603000  | -0.941829000 |
| H  | -5.595283000 | 2.340088000  | -0.193142000 |
| I  | 3.465940000  | -2.264251000 | -0.593736000 |

**TS1:** E= -1565.323198

|    |              |              |              |
|----|--------------|--------------|--------------|
| C  | -0.373225000 | 0.050023000  | 0.721261000  |
| C  | 0.024378000  | -0.187590000 | 1.972923000  |
| C  | 2.351538000  | 0.364087000  | 1.101968000  |
| C  | 3.500559000  | 1.826892000  | -0.178062000 |
| C  | 4.157001000  | 2.955049000  | -0.689302000 |
| C  | 4.783039000  | 2.831541000  | -1.927850000 |
| C  | 4.763963000  | 1.618041000  | -2.646856000 |
| C  | 4.109625000  | 0.500069000  | -2.142133000 |
| C  | 3.463773000  | 0.604319000  | -0.898078000 |
| H  | 4.197459000  | 3.899764000  | -0.144749000 |
| H  | 5.307768000  | 3.693534000  | -2.345930000 |
| H  | 5.275824000  | 1.558053000  | -3.609636000 |
| H  | 4.100806000  | -0.444181000 | -2.691102000 |
| C  | -0.854576000 | -0.506616000 | 3.151793000  |
| H  | -1.911343000 | -0.562117000 | 2.860185000  |
| H  | -0.562669000 | -1.474550000 | 3.592892000  |
| H  | -0.760632000 | 0.238531000  | 3.957944000  |
| C  | 1.555346000  | -0.209687000 | 2.247934000  |
| H  | 1.843879000  | -1.273470000 | 2.323992000  |
| C  | 2.705973000  | -0.309137000 | -0.084140000 |
| N  | 2.810590000  | 1.654847000  | 1.025248000  |
| C  | 2.602040000  | 2.720215000  | 1.998184000  |
| H  | 1.532504000  | 2.833884000  | 2.232033000  |
| H  | 3.163750000  | 2.529266000  | 2.922589000  |
| H  | 2.943473000  | 3.666358000  | 1.563627000  |
| C  | 0.293932000  | 0.268931000  | -0.483885000 |
| H  | 0.391270000  | -0.542167000 | -1.213612000 |
| H  | 0.443241000  | 1.282603000  | -0.878561000 |
| O  | 1.874703000  | 0.349851000  | 3.503020000  |
| H  | 1.323413000  | 1.124827000  | 3.668157000  |
| Au | -2.367307000 | 0.143355000  | -0.044214000 |
| P  | -4.629852000 | 0.212577000  | -0.728604000 |
| C  | -5.005555000 | 1.580230000  | -1.890889000 |
| H  | -4.391258000 | 1.476567000  | -2.797413000 |
| H  | -6.070443000 | 1.564157000  | -2.171435000 |
| H  | -4.770390000 | 2.544828000  | -1.417519000 |
| C  | -5.795581000 | 0.435226000  | 0.669470000  |
| H  | -6.833885000 | 0.462382000  | 0.303526000  |

|   |              |              |              |
|---|--------------|--------------|--------------|
| H | -5.685868000 | -0.396207000 | 1.381292000  |
| H | -5.572463000 | 1.376268000  | 1.193480000  |
| C | -5.184447000 | -1.313106000 | -1.580195000 |
| H | -5.058096000 | -2.178017000 | -0.912485000 |
| H | -6.244056000 | -1.228651000 | -1.868200000 |
| H | -4.575999000 | -1.476955000 | -2.481731000 |
| I | 2.662647000  | -2.395133000 | -0.383002000 |

**TS1'**: E= -1565.322636

|    |              |              |              |
|----|--------------|--------------|--------------|
| C  | 0.445219000  | -0.178233000 | 0.717448000  |
| C  | 0.039529000  | -0.000200000 | 1.982204000  |
| C  | -2.238707000 | -0.466266000 | 0.975513000  |
| C  | -3.537920000 | -1.801711000 | -0.301033000 |
| C  | -4.236473000 | -2.882454000 | -0.861512000 |
| C  | -5.002383000 | -2.634523000 | -1.996322000 |
| C  | -5.081443000 | -1.347076000 | -2.575892000 |
| C  | -4.388500000 | -0.277975000 | -2.028541000 |
| C  | -3.603241000 | -0.502595000 | -0.879473000 |
| H  | -4.203155000 | -3.881476000 | -0.424485000 |
| H  | -5.563664000 | -3.456431000 | -2.446802000 |
| H  | -5.700600000 | -1.197183000 | -3.462639000 |
| H  | -4.450160000 | 0.720113000  | -2.467595000 |
| C  | 0.899212000  | 0.268473000  | 3.185191000  |
| H  | 1.965891000  | 0.254621000  | 2.926567000  |
| H  | 0.658202000  | 1.255578000  | 3.616217000  |
| H  | 0.732357000  | -0.464669000 | 3.990952000  |
| C  | -1.488029000 | 0.016049000  | 2.206369000  |
| H  | -1.789211000 | 1.068848000  | 2.354129000  |
| C  | -2.786090000 | 0.332817000  | -0.058405000 |
| N  | -2.712972000 | -1.754581000 | 0.814628000  |
| C  | -2.377332000 | -2.914332000 | 1.629783000  |
| H  | -1.307707000 | -2.908554000 | 1.882025000  |
| H  | -2.973029000 | -2.941879000 | 2.553599000  |
| H  | -2.571423000 | -3.825431000 | 1.050342000  |
| C  | -0.382375000 | -0.357031000 | -0.416091000 |
| H  | -0.486720000 | 0.464728000  | -1.133820000 |
| H  | -0.553473000 | -1.355227000 | -0.840829000 |
| O  | -1.880309000 | -0.650354000 | 3.386579000  |
| H  | -1.279713000 | -1.385313000 | 3.562973000  |
| Au | 2.421557000  | -0.160848000 | -0.038011000 |
| P  | 4.661641000  | -0.110830000 | -0.796515000 |
| C  | 5.885557000  | -0.494709000 | 0.514609000  |
| H  | 5.693001000  | -1.498858000 | 0.920278000  |
| H  | 6.909305000  | -0.457800000 | 0.110491000  |
| H  | 5.794127000  | 0.235314000  | 1.332373000  |
| C  | 5.172545000  | 1.521416000  | -1.459873000 |
| H  | 6.223565000  | 1.494083000  | -1.787660000 |
| H  | 4.533771000  | 1.791272000  | -2.313725000 |
| H  | 5.055778000  | 2.290131000  | -0.681785000 |
| C  | 5.016280000  | -1.305366000 | -2.143206000 |
| H  | 4.372154000  | -1.090248000 | -3.008484000 |
| H  | 6.071457000  | -1.237291000 | -2.451210000 |
| H  | 4.805334000  | -2.327985000 | -1.797303000 |
| I  | -2.700860000 | 2.423590000  | -0.193824000 |

**INT2**: E= -1565.362360

|   |              |              |              |
|---|--------------|--------------|--------------|
| C | -0.367569000 | 0.598992000  | -0.197466000 |
| C | 0.070097000  | 1.816142000  | 0.202504000  |
| C | 2.465598000  | 1.133351000  | -0.219250000 |
| C | 4.149029000  | -0.069754000 | -1.120313000 |
| C | 5.356897000  | -0.401168000 | -1.725204000 |

|    |              |              |              |
|----|--------------|--------------|--------------|
| C  | 5.566675000  | -1.757056000 | -2.008327000 |
| C  | 4.599896000  | -2.722308000 | -1.692211000 |
| C  | 3.394985000  | -2.366036000 | -1.072089000 |
| C  | 3.175110000  | -1.021267000 | -0.784088000 |
| H  | 6.110011000  | 0.346327000  | -1.978042000 |
| H  | 6.499743000  | -2.064126000 | -2.485342000 |
| H  | 4.792705000  | -3.770761000 | -1.929136000 |
| H  | 2.657212000  | -3.127512000 | -0.810973000 |
| C  | -0.822681000 | 2.916507000  | 0.728275000  |
| H  | -1.881847000 | 2.642728000  | 0.636708000  |
| H  | -0.610084000 | 3.108402000  | 1.795727000  |
| H  | -0.657004000 | 3.869787000  | 0.201630000  |
| C  | 1.540347000  | 2.258432000  | 0.170386000  |
| H  | 1.830451000  | 2.588438000  | 1.186604000  |
| C  | 2.039768000  | -0.289357000 | -0.147280000 |
| N  | 3.665297000  | 1.225727000  | -0.751802000 |
| C  | 4.484585000  | 2.427524000  | -0.929596000 |
| H  | 4.807096000  | 2.486861000  | -1.978729000 |
| H  | 3.894150000  | 3.312088000  | -0.679197000 |
| H  | 5.372221000  | 2.344879000  | -0.284862000 |
| C  | 0.605478000  | -0.473778000 | -0.653293000 |
| H  | 0.255479000  | -1.477913000 | -0.371886000 |
| H  | 0.654832000  | -0.485679000 | -1.760249000 |
| O  | 1.732382000  | 3.391585000  | -0.664699000 |
| H  | 1.169639000  | 3.285900000  | -1.446695000 |
| Au | -2.381377000 | 0.060771000  | -0.247991000 |
| P  | -4.668195000 | -0.573897000 | -0.313539000 |
| C  | -5.100872000 | -1.715399000 | -1.687478000 |
| H  | -4.507834000 | -2.637955000 | -1.601184000 |
| H  | -6.171939000 | -1.970808000 | -1.665806000 |
| H  | -4.862066000 | -1.239807000 | -2.650275000 |
| C  | -5.834059000 | 0.833246000  | -0.511507000 |
| H  | -6.876985000 | 0.480389000  | -0.536603000 |
| H  | -5.710404000 | 1.534799000  | 0.326837000  |
| H  | -5.610859000 | 1.368965000  | -1.446059000 |
| C  | -5.257748000 | -1.438986000 | 1.196813000  |
| H  | -5.118194000 | -0.787709000 | 2.072344000  |
| H  | -6.322932000 | -1.704454000 | 1.108623000  |
| H  | -4.667927000 | -2.354629000 | 1.351190000  |
| I  | 2.135791000  | -0.679772000 | 2.085296000  |

**INT2'** : E= -1565.345857

|   |              |              |              |
|---|--------------|--------------|--------------|
| C | 0.479192000  | -0.553626000 | 0.451775000  |
| C | -0.061990000 | -0.542486000 | 1.689401000  |
| C | -1.952785000 | -0.817701000 | 0.152935000  |
| C | -4.059589000 | -1.344670000 | -0.630414000 |
| C | -5.241080000 | -2.001553000 | -1.064690000 |
| C | -6.320384000 | -1.211783000 | -1.395699000 |
| C | -6.290143000 | 0.221552000  | -1.315006000 |
| C | -5.164140000 | 0.877695000  | -0.893287000 |
| C | -4.016133000 | 0.101705000  | -0.537161000 |
| H | -5.298640000 | -3.088379000 | -1.126341000 |
| H | -7.242981000 | -1.692633000 | -1.731003000 |
| H | -7.183745000 | 0.783447000  | -1.592902000 |
| H | -5.127888000 | 1.966588000  | -0.824154000 |
| C | 0.608602000  | -0.284128000 | 3.009347000  |
| H | 1.694169000  | -0.168281000 | 2.887251000  |
| H | 0.214761000  | 0.636537000  | 3.475421000  |
| H | 0.421700000  | -1.100732000 | 3.726758000  |
| C | -1.532001000 | -0.923126000 | 1.715122000  |
| H | -2.162047000 | -0.229701000 | 2.294796000  |
| C | -2.751214000 | 0.424558000  | -0.084536000 |

|    |              |              |              |
|----|--------------|--------------|--------------|
| N  | -2.884114000 | -1.868454000 | -0.263906000 |
| C  | -2.595002000 | -3.293492000 | -0.237696000 |
| H  | -1.510226000 | -3.449649000 | -0.229022000 |
| H  | -3.023390000 | -3.763797000 | 0.659499000  |
| H  | -2.999611000 | -3.771671000 | -1.141792000 |
| C  | -0.568544000 | -0.834646000 | -0.602941000 |
| H  | -0.566750000 | -0.087250000 | -1.412005000 |
| H  | -0.412692000 | -1.808582000 | -1.096806000 |
| O  | -1.756842000 | -2.187760000 | 2.278507000  |
| H  | -0.960196000 | -2.723112000 | 2.146654000  |
| Au | 2.458958000  | -0.254189000 | -0.066313000 |
| P  | 4.738809000  | 0.070873000  | -0.650945000 |
| C  | 5.911511000  | -0.159508000 | 0.745374000  |
| H  | 5.809316000  | -1.177870000 | 1.148816000  |
| H  | 6.951052000  | -0.002511000 | 0.417409000  |
| H  | 5.673980000  | 0.554760000  | 1.547656000  |
| C  | 5.131446000  | 1.745985000  | -1.297496000 |
| H  | 6.200364000  | 1.829925000  | -1.548969000 |
| H  | 4.531229000  | 1.943903000  | -2.197904000 |
| H  | 4.877594000  | 2.502507000  | -0.540260000 |
| C  | 5.357155000  | -1.070345000 | -1.952475000 |
| H  | 4.763531000  | -0.940501000 | -2.869522000 |
| H  | 6.417430000  | -0.874895000 | -2.177317000 |
| H  | 5.245425000  | -2.110870000 | -1.613308000 |
| I  | -2.056945000 | 2.346515000  | 0.262338000  |

**TS2:** E= -1565.33822

|    |              |              |              |
|----|--------------|--------------|--------------|
| C  | 0.232356000  | -0.174566000 | -0.599248000 |
| C  | -0.304408000 | -1.450386000 | -0.785612000 |
| C  | -2.632617000 | -0.548201000 | -0.866349000 |
| C  | -4.413689000 | 0.745720000  | -0.478310000 |
| C  | -5.708586000 | 1.221850000  | -0.300463000 |
| C  | -5.849972000 | 2.556756000  | 0.104824000  |
| C  | -4.733342000 | 3.381914000  | 0.329056000  |
| C  | -3.438048000 | 2.894935000  | 0.159315000  |
| C  | -3.268304000 | 1.559207000  | -0.248623000 |
| H  | -6.586349000 | 0.595184000  | -0.465996000 |
| H  | -6.853523000 | 2.962600000  | 0.250754000  |
| H  | -4.886478000 | 4.415392000  | 0.646058000  |
| H  | -2.574722000 | 3.537330000  | 0.346329000  |
| C  | 0.521110000  | -2.699626000 | -0.780166000 |
| H  | 1.550227000  | -2.512049000 | -0.448508000 |
| H  | 0.069821000  | -3.470560000 | -0.134825000 |
| H  | 0.545867000  | -3.115079000 | -1.804128000 |
| C  | -1.736542000 | -1.669558000 | -1.309610000 |
| H  | -2.103673000 | -2.621240000 | -0.901462000 |
| C  | -2.128968000 | 0.732167000  | -0.508801000 |
| N  | -3.978286000 | -0.529417000 | -0.887576000 |
| C  | -4.855778000 | -1.646111000 | -1.206107000 |
| H  | -4.311267000 | -2.375585000 | -1.817009000 |
| H  | -5.229678000 | -2.128031000 | -0.288438000 |
| H  | -5.710677000 | -1.281287000 | -1.792088000 |
| C  | -0.686564000 | 1.016618000  | -0.659270000 |
| H  | -0.349827000 | 1.824131000  | 0.008921000  |
| H  | -0.526605000 | 1.444850000  | -1.677803000 |
| O  | -1.772172000 | -1.854505000 | -2.718488000 |
| H  | -1.397655000 | -1.078956000 | -3.161731000 |
| Au | 2.253605000  | 0.193938000  | -0.307843000 |
| P  | 4.555117000  | 0.640921000  | 0.080457000  |
| C  | 5.045809000  | 2.381067000  | -0.239343000 |
| H  | 4.462495000  | 3.054110000  | 0.406268000  |
| H  | 6.118706000  | 2.529029000  | -0.040105000 |



|   |              |              |              |
|---|--------------|--------------|--------------|
| H | 4.835092000  | 2.637196000  | -1.288205000 |
| C | 5.701595000  | -0.360965000 | -0.945869000 |
| H | 6.749556000  | -0.113752000 | -0.715031000 |
| H | 5.532429000  | -1.430620000 | -0.752559000 |
| H | 5.510461000  | -0.166665000 | -2.011637000 |
| C | 5.076004000  | 0.317181000  | 1.810944000  |
| H | 4.884420000  | -0.736514000 | 2.062246000  |
| H | 6.147632000  | 0.532115000  | 1.945556000  |
| H | 4.490800000  | 0.947352000  | 2.496856000  |
| I | -1.426859000 | -1.120564000 | 1.874566000  |

**INT3:** E= -1565.357678

|    |              |              |              |
|----|--------------|--------------|--------------|
| C  | -0.024880000 | -0.102811000 | 0.297863000  |
| C  | 0.517713000  | -1.402190000 | 0.730746000  |
| C  | 2.844128000  | -0.432600000 | 0.754839000  |
| C  | 4.659255000  | 0.771878000  | 0.247878000  |
| C  | 5.964885000  | 1.238969000  | 0.030443000  |
| C  | 6.111734000  | 2.519129000  | -0.494127000 |
| C  | 4.991700000  | 3.323444000  | -0.801938000 |
| C  | 3.698344000  | 2.861085000  | -0.591036000 |
| C  | 3.516677000  | 1.568323000  | -0.061192000 |
| H  | 6.838937000  | 0.625206000  | 0.256023000  |
| H  | 7.115778000  | 2.909939000  | -0.674666000 |
| H  | 5.149662000  | 4.323009000  | -1.212976000 |
| H  | 2.839741000  | 3.492727000  | -0.833138000 |
| C  | -0.410268000 | -2.432217000 | 1.329606000  |
| H  | -1.404628000 | -2.414537000 | 0.866360000  |
| H  | 0.014894000  | -3.443612000 | 1.260616000  |
| H  | -0.509735000 | -2.193687000 | 2.400948000  |
| C  | 1.977102000  | -1.531932000 | 1.261453000  |
| H  | 2.344915000  | -2.519900000 | 0.940921000  |
| C  | 2.370639000  | 0.770977000  | 0.278635000  |
| N  | 4.224893000  | -0.441598000 | 0.757407000  |
| C  | 5.077869000  | -1.530278000 | 1.197909000  |
| H  | 4.542253000  | -2.144067000 | 1.934480000  |
| H  | 5.402351000  | -2.167251000 | 0.357749000  |
| H  | 5.972306000  | -1.123658000 | 1.691014000  |
| C  | 0.912059000  | 1.070624000  | 0.200359000  |
| H  | 0.648806000  | 1.688952000  | -0.674016000 |
| H  | 0.585481000  | 1.702689000  | 1.058486000  |
| O  | 1.934128000  | -1.593646000 | 2.682462000  |
| H  | 2.021190000  | -0.693662000 | 3.030356000  |
| Au | -2.069850000 | 0.309063000  | 0.200880000  |
| P  | -4.370617000 | 0.872192000  | 0.120874000  |
| C  | -4.887737000 | 1.607574000  | -1.478429000 |
| H  | -4.692744000 | 0.896309000  | -2.294598000 |
| H  | -5.960915000 | 1.853773000  | -1.461627000 |
| H  | -4.309592000 | 2.523638000  | -1.669590000 |
| C  | -4.864638000 | 2.099723000  | 1.391330000  |
| H  | -5.937897000 | 2.331507000  | 1.307898000  |
| H  | -4.658266000 | 1.699328000  | 2.394868000  |
| H  | -4.284132000 | 3.024728000  | 1.259297000  |
| C  | -5.496489000 | -0.553956000 | 0.374265000  |
| H  | -5.299406000 | -1.013737000 | 1.353959000  |
| H  | -6.547613000 | -0.228342000 | 0.333307000  |
| H  | -5.321867000 | -1.308472000 | -0.406961000 |
| I  | 0.523246000  | -1.670828000 | -1.578765000 |

**INT4:** E= -1565.388698

|   |             |             |             |
|---|-------------|-------------|-------------|
| C | 0.114491000 | 1.489816000 | 0.195018000 |
|---|-------------|-------------|-------------|

|    |              |              |              |
|----|--------------|--------------|--------------|
| C  | 0.058061000  | 1.034478000  | 1.502156000  |
| C  | -2.265064000 | 0.163641000  | 1.018977000  |
| C  | -4.203332000 | -0.397112000 | 0.045708000  |
| C  | -5.487515000 | -0.881065000 | -0.248501000 |
| C  | -5.976655000 | -0.668143000 | -1.533918000 |
| C  | -5.214243000 | 0.011302000  | -2.510035000 |
| C  | -3.943270000 | 0.493028000  | -2.218778000 |
| C  | -3.420736000 | 0.290495000  | -0.926274000 |
| H  | -6.090304000 | -1.399520000 | 0.499419000  |
| H  | -6.974651000 | -1.029835000 | -1.792184000 |
| H  | -5.635916000 | 0.162874000  | -3.506189000 |
| H  | -3.365284000 | 1.023165000  | -2.980223000 |
| C  | 1.050503000  | 1.374272000  | 2.585029000  |
| H  | 2.057514000  | 1.581814000  | 2.203448000  |
| H  | 0.697895000  | 2.286499000  | 3.099938000  |
| H  | 1.090193000  | 0.566975000  | 3.328510000  |
| C  | -1.210147000 | 0.342859000  | 2.059462000  |
| H  | -1.566650000 | 1.007115000  | 2.870329000  |
| C  | -2.188779000 | 0.637749000  | -0.273091000 |
| N  | -3.482929000 | -0.465684000 | 1.226571000  |
| C  | -4.002372000 | -1.004403000 | 2.472371000  |
| H  | -3.191427000 | -1.091429000 | 3.204412000  |
| H  | -4.796489000 | -0.359869000 | 2.884585000  |
| H  | -4.424618000 | -2.007624000 | 2.305530000  |
| C  | -1.048848000 | 1.462337000  | -0.776158000 |
| H  | -1.366523000 | 2.513134000  | -0.921454000 |
| H  | -0.702764000 | 1.134953000  | -1.771118000 |
| O  | -0.860339000 | -0.865483000 | 2.727194000  |
| H  | -0.856536000 | -1.576547000 | 2.069271000  |
| Au | 1.190424000  | -0.591503000 | 0.085413000  |
| P  | 2.346279000  | -2.488126000 | -0.629883000 |
| C  | 3.908049000  | -2.070874000 | -1.487784000 |
| H  | 4.566604000  | -1.509369000 | -0.809119000 |
| H  | 4.419157000  | -2.990558000 | -1.813251000 |
| H  | 3.693325000  | -1.444590000 | -2.365973000 |
| C  | 1.383360000  | -3.509108000 | -1.804757000 |
| H  | 1.970951000  | -4.389470000 | -2.109244000 |
| H  | 0.447916000  | -3.842858000 | -1.332430000 |
| H  | 1.133082000  | -2.915366000 | -2.696115000 |
| C  | 2.808230000  | -3.601827000 | 0.747394000  |
| H  | 1.903590000  | -3.946337000 | 1.269332000  |
| H  | 3.356467000  | -4.474717000 | 0.359459000  |
| H  | 3.444515000  | -3.063461000 | 1.464918000  |
| I  | 1.698964000  | 2.811220000  | -0.457467000 |

**INT2-C1:** E= -1727.633714

|    |              |              |              |
|----|--------------|--------------|--------------|
| C  | 0.946644000  | -0.612488000 | -0.119493000 |
| C  | -0.036567000 | 0.532654000  | 0.029543000  |
| C  | 0.389618000  | 1.799060000  | 0.236060000  |
| C  | 1.876869000  | 2.205572000  | 0.309203000  |
| C  | 2.781442000  | 1.025802000  | 0.115658000  |
| C  | 2.321201000  | -0.344541000 | 0.529672000  |
| C  | 3.469982000  | -1.219370000 | 0.114347000  |
| C  | 4.436040000  | -0.397411000 | -0.474564000 |
| N  | 3.965285000  | 0.961362000  | -0.441022000 |
| C  | 3.694735000  | -2.587153000 | 0.221015000  |
| C  | 4.897358000  | -3.100235000 | -0.286614000 |
| C  | 5.850435000  | -2.261315000 | -0.879651000 |
| C  | 5.636298000  | -0.880098000 | -0.983965000 |
| Au | -2.049060000 | -0.001308000 | -0.092018000 |
| P  | -4.332121000 | -0.636713000 | -0.222457000 |
| C  | -4.683244000 | -2.326982000 | 0.407840000  |

|    |              |              |              |
|----|--------------|--------------|--------------|
| C  | -0.518503000 | 2.985446000  | 0.465293000  |
| O  | 2.182362000  | 3.280370000  | -0.559502000 |
| C1 | 2.163761000  | -0.320282000 | 2.354068000  |
| C  | 4.802181000  | 2.057264000  | -0.943590000 |
| C  | -5.024823000 | -0.632144000 | -1.924537000 |
| C  | -5.467769000 | 0.447421000  | 0.732328000  |
| H  | 6.383301000  | -0.231610000 | -1.443417000 |
| H  | 6.779067000  | -2.687228000 | -1.265267000 |
| H  | 5.097144000  | -4.171498000 | -0.215412000 |
| H  | 2.963908000  | -3.244089000 | 0.696915000  |
| H  | -1.571039000 | 2.699520000  | 0.342491000  |
| H  | -0.387176000 | 3.379089000  | 1.489598000  |
| H  | -0.300650000 | 3.822874000  | -0.216161000 |
| H  | 2.074267000  | 2.575450000  | 1.336667000  |
| H  | 5.035286000  | 1.870877000  | -2.001719000 |
| H  | 4.265400000  | 3.002503000  | -0.834449000 |
| H  | 5.738186000  | 2.066540000  | -0.366586000 |
| H  | 0.555916000  | -1.541519000 | 0.323783000  |
| H  | 1.110189000  | -0.839748000 | -1.189754000 |
| H  | 1.675881000  | 3.159350000  | -1.376835000 |
| H  | -4.457997000 | -1.333165000 | -2.554955000 |
| H  | -6.086201000 | -0.925892000 | -1.919813000 |
| H  | -4.930242000 | 0.374727000  | -2.357510000 |
| H  | -6.509812000 | 0.102594000  | 0.642662000  |
| H  | -5.175537000 | 0.444597000  | 1.792891000  |
| H  | -5.395451000 | 1.479049000  | 0.357187000  |
| H  | -4.371013000 | -2.398878000 | 1.460254000  |
| H  | -5.756595000 | -2.561746000 | 0.332416000  |
| H  | -4.110521000 | -3.064372000 | -0.173979000 |

**INT2-Br:** E= -3841.438104

|    |              |              |              |
|----|--------------|--------------|--------------|
| C  | -0.202895000 | 0.540752000  | -0.100430000 |
| C  | 0.224690000  | 1.801497000  | 0.140190000  |
| C  | 2.622515000  | 1.060015000  | -0.106859000 |
| C  | 4.292642000  | -0.292890000 | -0.803500000 |
| C  | 5.494421000  | -0.723734000 | -1.354296000 |
| C  | 5.713415000  | -2.107671000 | -1.376273000 |
| C  | 4.762178000  | -3.000348000 | -0.863778000 |
| C  | 3.560210000  | -2.539975000 | -0.307639000 |
| C  | 3.331337000  | -1.167996000 | -0.283866000 |
| H  | 6.237405000  | -0.033259000 | -1.755337000 |
| H  | 6.642853000  | -2.493797000 | -1.799932000 |
| H  | 4.963624000  | -4.073225000 | -0.894271000 |
| H  | 2.833098000  | -3.241629000 | 0.106205000  |
| C  | -0.681026000 | 2.966825000  | 0.466431000  |
| H  | -1.736358000 | 2.686033000  | 0.355119000  |
| H  | -0.522986000 | 3.295685000  | 1.509708000  |
| H  | -0.479940000 | 3.843820000  | -0.168647000 |
| C  | 1.704384000  | 2.226056000  | 0.134103000  |
| H  | 1.953192000  | 2.624396000  | 1.138113000  |
| C  | 2.188594000  | -0.336130000 | 0.216267000  |
| N  | 3.809733000  | 1.052183000  | -0.664318000 |
| C  | 4.632965000  | 2.196060000  | -1.071179000 |
| H  | 4.066864000  | 3.119919000  | -0.931362000 |
| H  | 5.549275000  | 2.195765000  | -0.462857000 |
| H  | 4.905033000  | 2.079824000  | -2.129839000 |
| C  | 0.779622000  | -0.589040000 | -0.346354000 |
| H  | 0.413782000  | -1.538458000 | 0.073204000  |
| H  | 0.883699000  | -0.769715000 | -1.433629000 |
| O  | 1.947033000  | 3.288228000  | -0.773442000 |
| H  | 1.411508000  | 3.132750000  | -1.566238000 |
| Au | -2.217067000 | 0.003856000  | -0.170383000 |

|    |              |              |              |
|----|--------------|--------------|--------------|
| P  | -4.508844000 | -0.608549000 | -0.261141000 |
| C  | -5.667711000 | 0.800170000  | -0.036864000 |
| H  | -5.496132000 | 1.548311000  | -0.824937000 |
| H  | -6.714091000 | 0.459853000  | -0.082663000 |
| H  | -5.485103000 | 1.276659000  | 0.937716000  |
| C  | -5.022976000 | -1.824096000 | 1.017641000  |
| H  | -6.094551000 | -2.061745000 | 0.927256000  |
| H  | -4.436906000 | -2.748241000 | 0.905210000  |
| H  | -4.826899000 | -1.410898000 | 2.018129000  |
| C  | -5.030073000 | -1.373506000 | -1.848783000 |
| H  | -4.445535000 | -2.288262000 | -2.026619000 |
| H  | -6.101803000 | -1.626364000 | -1.830989000 |
| H  | -4.836804000 | -0.674298000 | -2.675780000 |
| Br | 2.161132000  | -0.399044000 | 2.227962000  |

**TS2-C1:** E= -1727.587045

|    |              |              |              |
|----|--------------|--------------|--------------|
| C  | 0.030504000  | -0.386222000 | -0.220761000 |
| C  | -0.490246000 | -1.664604000 | 0.017853000  |
| C  | -2.831978000 | -0.870591000 | -0.257487000 |
| C  | -4.627333000 | 0.453076000  | -0.128764000 |
| C  | -5.922301000 | 0.935332000  | 0.001727000  |
| C  | -6.085562000 | 2.329987000  | 0.047188000  |
| C  | -4.987960000 | 3.204137000  | -0.030609000 |
| C  | -3.688955000 | 2.711248000  | -0.152182000 |
| C  | -3.497950000 | 1.317546000  | -0.201498000 |
| H  | -6.786715000 | 0.272905000  | 0.068892000  |
| H  | -7.092333000 | 2.741661000  | 0.147394000  |
| H  | -5.157073000 | 4.281850000  | 0.011684000  |
| H  | -2.838708000 | 3.395217000  | -0.199711000 |
| C  | 0.349167000  | -2.828122000 | 0.431802000  |
| H  | 1.397692000  | -2.547595000 | 0.592336000  |
| H  | -0.050925000 | -3.266474000 | 1.361044000  |
| H  | 0.297198000  | -3.610832000 | -0.346832000 |
| C  | -1.920480000 | -2.056290000 | -0.395684000 |
| H  | -2.253150000 | -2.849385000 | 0.286314000  |
| C  | -2.351507000 | 0.472411000  | -0.303364000 |
| N  | -4.170850000 | -0.881585000 | -0.204531000 |
| C  | -5.024610000 | -2.058348000 | -0.128731000 |
| H  | -4.499424000 | -2.918512000 | -0.560095000 |
| H  | -5.301942000 | -2.271639000 | 0.915991000  |
| H  | -5.936864000 | -1.884858000 | -0.715655000 |
| C  | -0.923048000 | 0.725926000  | -0.539707000 |
| H  | -0.592613000 | 1.683422000  | -0.104632000 |
| H  | -0.786247000 | 0.895522000  | -1.636227000 |
| O  | -1.983754000 | -2.637613000 | -1.688576000 |
| H  | -1.622510000 | -2.025348000 | -2.346334000 |
| Au | 2.049506000  | 0.063354000  | -0.138658000 |
| P  | 4.357857000  | 0.604946000  | 0.030826000  |
| C  | 4.940790000  | 1.830469000  | -1.206148000 |
| H  | 4.373144000  | 2.766253000  | -1.095886000 |
| H  | 6.013404000  | 2.040278000  | -1.070947000 |
| H  | 4.773864000  | 1.440253000  | -2.221010000 |
| C  | 5.478924000  | -0.834392000 | -0.176820000 |
| H  | 6.531913000  | -0.524745000 | -0.087294000 |
| H  | 5.258296000  | -1.588730000 | 0.592922000  |
| H  | 5.318619000  | -1.289863000 | -1.165240000 |
| C  | 4.822235000  | 1.325198000  | 1.654374000  |
| H  | 4.578773000  | 0.614173000  | 2.457687000  |
| H  | 5.899075000  | 1.553281000  | 1.686020000  |
| H  | 4.250752000  | 2.249271000  | 1.826130000  |
| C1 | -1.623837000 | -0.800225000 | 2.151071000  |

**TS2-Br:** E= -3841.402151

|    |              |              |              |
|----|--------------|--------------|--------------|
| C  | 0.138675000  | -0.307750000 | -0.399757000 |
| C  | -0.394211000 | -1.600018000 | -0.330296000 |
| C  | -2.726660000 | -0.748061000 | -0.553828000 |
| C  | -4.513509000 | 0.577395000  | -0.344142000 |
| C  | -5.807912000 | 1.062691000  | -0.206036000 |
| C  | -5.957571000 | 2.446687000  | -0.023957000 |
| C  | -4.848508000 | 3.309161000  | 0.022533000  |
| C  | -3.551556000 | 2.813468000  | -0.107063000 |
| C  | -3.373911000 | 1.429667000  | -0.292099000 |
| H  | -6.681049000 | 0.408978000  | -0.233702000 |
| H  | -6.962567000 | 2.860201000  | 0.086138000  |
| H  | -5.007835000 | 4.379235000  | 0.169013000  |
| H  | -2.692856000 | 3.486601000  | -0.057293000 |
| C  | 0.436328000  | -2.817002000 | -0.075744000 |
| H  | 1.476831000  | -2.565059000 | 0.164965000  |
| H  | 0.010591000  | -3.411258000 | 0.749244000  |
| H  | 0.420972000  | -3.458785000 | -0.975759000 |
| C  | -1.824540000 | -1.923249000 | -0.800196000 |
| H  | -2.178433000 | -2.784992000 | -0.219047000 |
| C  | -2.231946000 | 0.583066000  | -0.441415000 |
| N  | -4.069068000 | -0.746937000 | -0.541980000 |
| C  | -4.934744000 | -1.914636000 | -0.621857000 |
| H  | -4.409536000 | -2.722425000 | -1.145003000 |
| H  | -5.234344000 | -2.249083000 | 0.384299000  |
| H  | -5.834304000 | -1.662109000 | -1.199456000 |
| C  | -0.794878000 | 0.845409000  | -0.631875000 |
| H  | -0.463179000 | 1.751456000  | -0.099718000 |
| H  | -0.637026000 | 1.115254000  | -1.704715000 |
| O  | -1.870614000 | -2.359765000 | -2.150950000 |
| H  | -1.505761000 | -1.676734000 | -2.732703000 |
| Au | 2.160662000  | 0.113554000  | -0.228197000 |
| P  | 4.467724000  | 0.624314000  | 0.028505000  |
| C  | 5.434004000  | 0.551650000  | -1.531658000 |
| H  | 5.022054000  | 1.269896000  | -2.255863000 |
| H  | 6.492840000  | 0.791197000  | -1.346371000 |
| H  | 5.362057000  | -0.457043000 | -1.964605000 |
| C  | 5.348084000  | -0.507909000 | 1.174772000  |
| H  | 6.409220000  | -0.226779000 | 1.261927000  |
| H  | 4.879798000  | -0.464936000 | 2.169288000  |
| H  | 5.277766000  | -1.540794000 | 0.802820000  |
| C  | 4.789103000  | 2.303397000  | 0.697478000  |
| H  | 4.306923000  | 2.407592000  | 1.680731000  |
| H  | 5.870704000  | 2.480351000  | 0.804203000  |
| H  | 4.364320000  | 3.059299000  | 0.020557000  |
| Br | -1.533270000 | -0.904075000 | 2.029524000  |

**INT3-C1:** E= -1727.623029

|   |              |              |              |
|---|--------------|--------------|--------------|
| C | -1.001395000 | 0.796341000  | -0.228436000 |
| C | -0.034903000 | -0.314758000 | -0.029778000 |
| C | -0.572344000 | -1.708924000 | 0.112702000  |
| C | -2.042859000 | -2.029166000 | -0.302638000 |
| C | -2.914133000 | -0.826302000 | -0.185279000 |
| C | -2.452560000 | 0.471584000  | -0.166607000 |
| C | -3.603043000 | 1.328915000  | -0.085652000 |
| C | -4.737594000 | 0.464465000  | -0.065032000 |
| N | -4.293124000 | -0.846376000 | -0.138916000 |
| C | -3.795765000 | 2.723071000  | -0.025884000 |
| C | -5.092002000 | 3.217493000  | 0.056061000  |
| C | -6.203904000 | 2.346323000  | 0.079415000  |
| C | -6.045871000 | 0.965377000  | 0.020972000  |

|    |              |              |              |
|----|--------------|--------------|--------------|
| Au | 1.991373000  | 0.112202000  | -0.053551000 |
| P  | 4.301874000  | 0.666770000  | -0.101691000 |
| C  | 5.413943000  | -0.777097000 | 0.104118000  |
| C  | 0.364729000  | -2.858031000 | -0.188991000 |
| Cl | -0.563916000 | -1.342632000 | 1.959069000  |
| O  | -2.062761000 | -2.603389000 | -1.599832000 |
| C  | -5.137544000 | -2.027578000 | -0.141484000 |
| C  | 4.790280000  | 1.840851000  | 1.220067000  |
| C  | 4.828567000  | 1.459719000  | -1.669182000 |
| H  | -6.913110000 | 0.303110000  | 0.048610000  |
| H  | -7.210108000 | 2.766092000  | 0.147906000  |
| H  | -5.258210000 | 4.295918000  | 0.104648000  |
| H  | -2.944346000 | 3.408486000  | -0.042252000 |
| H  | 1.366262000  | -2.678152000 | 0.222505000  |
| H  | -0.034378000 | -3.798228000 | 0.217832000  |
| H  | 0.432313000  | -2.970698000 | -1.281270000 |
| H  | -2.371427000 | -2.829551000 | 0.381525000  |
| H  | -4.606239000 | -2.859993000 | -0.621621000 |
| H  | -5.434442000 | -2.322996000 | 0.878872000  |
| H  | -6.047884000 | -1.831141000 | -0.725670000 |
| H  | -0.713973000 | 1.650451000  | 0.411819000  |
| H  | -0.698642000 | 1.162598000  | -1.240925000 |
| H  | -2.215424000 | -1.899954000 | -2.247596000 |
| H  | 4.570698000  | 1.403612000  | 2.205290000  |
| H  | 5.866126000  | 2.066813000  | 1.156305000  |
| H  | 4.218208000  | 2.774818000  | 1.117748000  |
| H  | 5.902545000  | 1.700677000  | -1.636844000 |
| H  | 4.635702000  | 0.780523000  | -2.512689000 |
| H  | 4.255197000  | 2.384884000  | -1.828013000 |
| H  | 5.238859000  | -1.499873000 | -0.706435000 |
| H  | 6.467703000  | -0.458261000 | 0.082296000  |
| H  | 5.206876000  | -1.271877000 | 1.064531000  |

**INT3-Br:** E= -3841.430115

|   |              |              |              |
|---|--------------|--------------|--------------|
| C | -0.005308000 | -0.225940000 | -0.151474000 |
| C | -0.546576000 | -1.607410000 | -0.274702000 |
| C | -2.882183000 | -0.673964000 | -0.451872000 |
| C | -4.701246000 | 0.600979000  | -0.186025000 |
| C | -6.008022000 | 1.098050000  | -0.061080000 |
| C | -6.158270000 | 2.457675000  | 0.192462000  |
| C | -5.040599000 | 3.311931000  | 0.323716000  |
| C | -3.746125000 | 2.821029000  | 0.203985000  |
| C | -3.561265000 | 1.448157000  | -0.052555000 |
| H | -6.880480000 | 0.448513000  | -0.152463000 |
| H | -7.163231000 | 2.873557000  | 0.295006000  |
| H | -5.201271000 | 4.373685000  | 0.523392000  |
| H | -2.889512000 | 3.492113000  | 0.307639000  |
| C | 0.385905000  | -2.713974000 | -0.710201000 |
| H | 1.385764000  | -2.600991000 | -0.272315000 |
| H | -0.023956000 | -3.699547000 | -0.447029000 |
| H | 0.463573000  | -2.673082000 | -1.807786000 |
| C | -2.016517000 | -1.852505000 | -0.735241000 |
| H | -2.361288000 | -2.747522000 | -0.191583000 |
| C | -2.413453000 | 0.602718000  | -0.231885000 |
| N | -4.262922000 | -0.688812000 | -0.441302000 |
| C | -5.111764000 | -1.849568000 | -0.640208000 |
| H | -4.580172000 | -2.595651000 | -1.245783000 |
| H | -5.418305000 | -2.305650000 | 0.316243000  |
| H | -6.016646000 | -1.556374000 | -1.191205000 |
| C | -0.958670000 | 0.923859000  | -0.223408000 |
| H | -0.685573000 | 1.676029000  | 0.537430000  |
| H | -0.643898000 | 1.419504000  | -1.172617000 |

|    |              |              |              |
|----|--------------|--------------|--------------|
| O  | -2.016951000 | -2.222422000 | -2.106992000 |
| H  | -2.134484000 | -1.423184000 | -2.641491000 |
| Au | 2.031112000  | 0.200917000  | -0.139268000 |
| P  | 4.335892000  | 0.764031000  | -0.152695000 |
| C  | 4.804843000  | 1.933650000  | 1.180254000  |
| H  | 4.575142000  | 1.490831000  | 2.160664000  |
| H  | 5.880443000  | 2.164296000  | 1.130701000  |
| H  | 4.230306000  | 2.865864000  | 1.075702000  |
| C  | 4.883159000  | 1.566026000  | -1.708697000 |
| H  | 5.955596000  | 1.811022000  | -1.659606000 |
| H  | 4.705239000  | 0.889955000  | -2.557969000 |
| H  | 4.308545000  | 2.489622000  | -1.872068000 |
| C  | 5.451809000  | -0.676101000 | 0.061377000  |
| H  | 5.289422000  | -1.396677000 | -0.753771000 |
| H  | 6.504514000  | -0.353122000 | 0.053433000  |
| H  | 5.235112000  | -1.175244000 | 1.017394000  |
| Br | -0.523122000 | -1.462500000 | 1.787974000  |



Q098CS79E

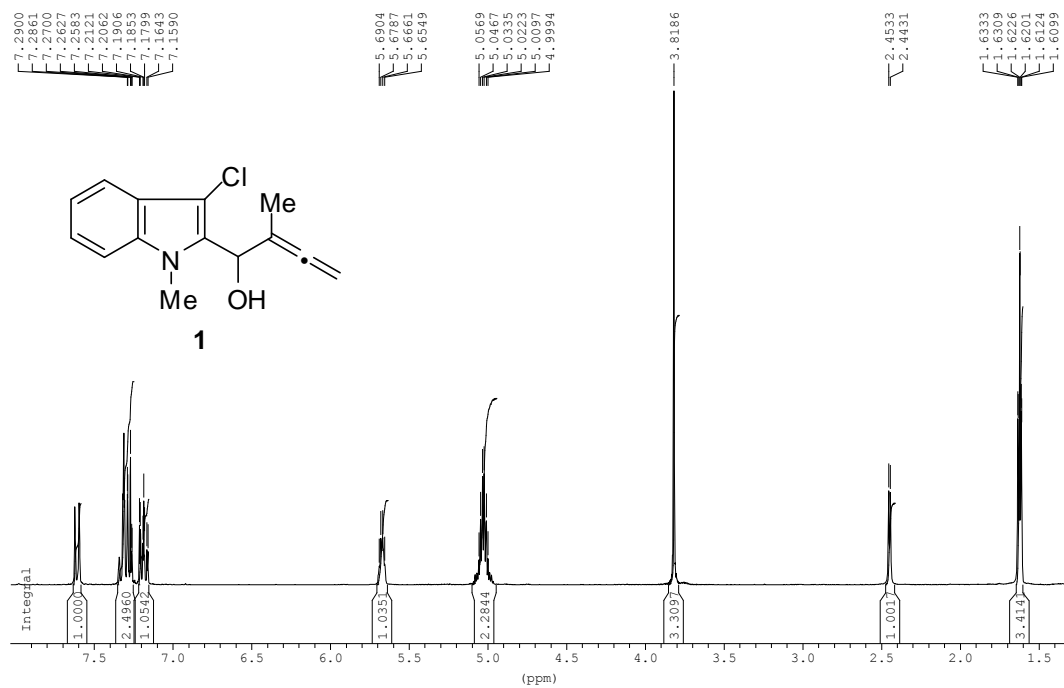

Q098CS79E

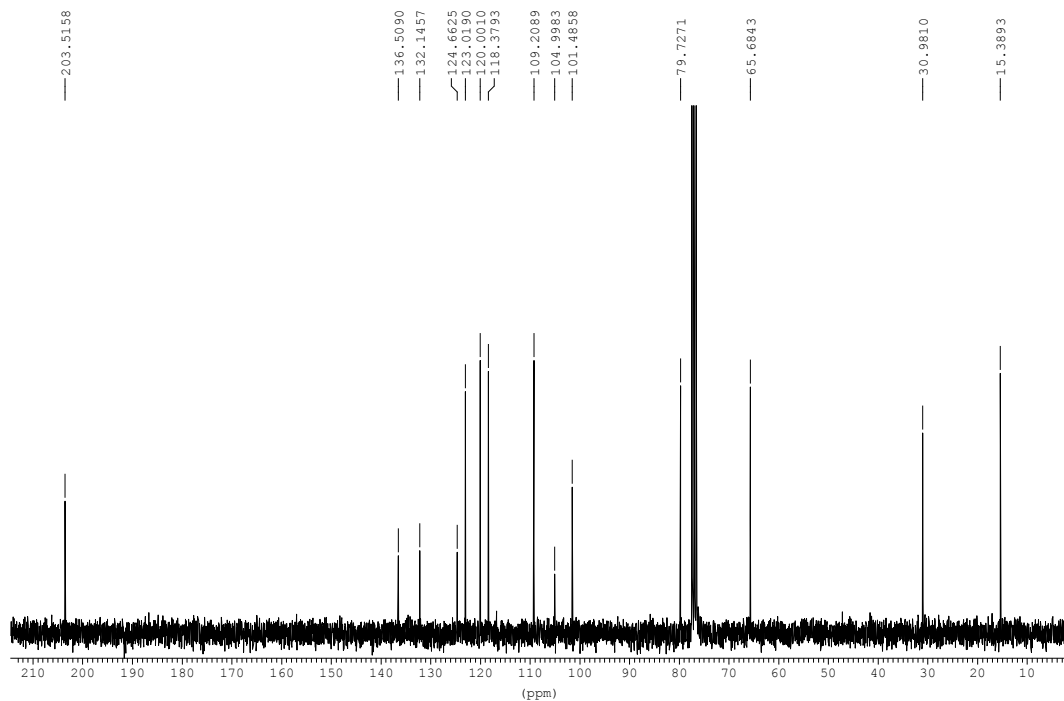

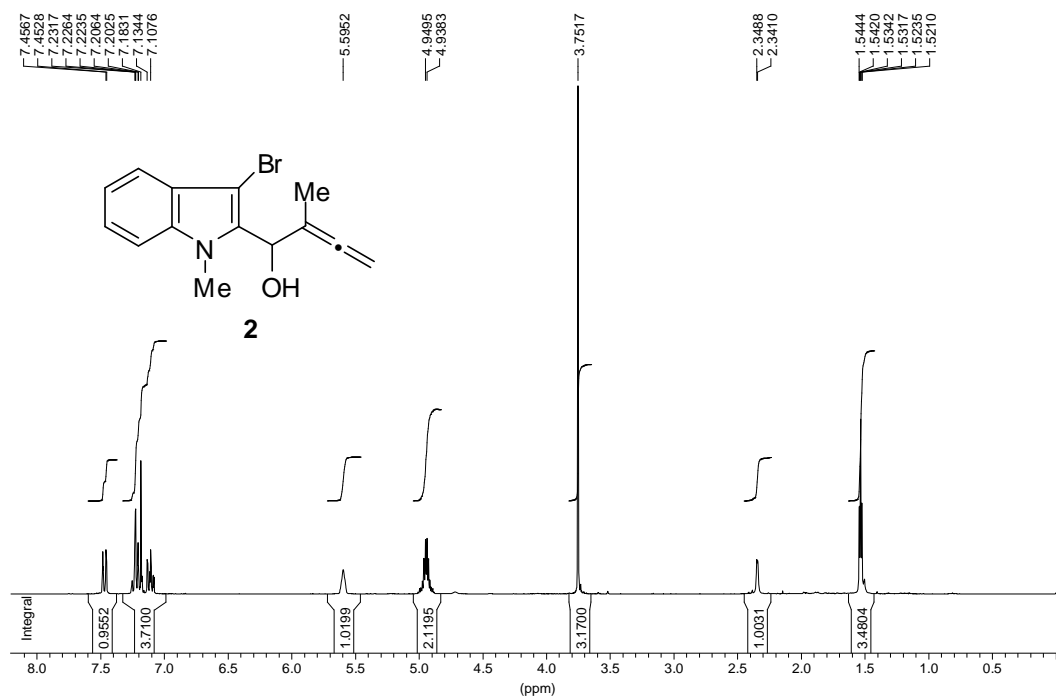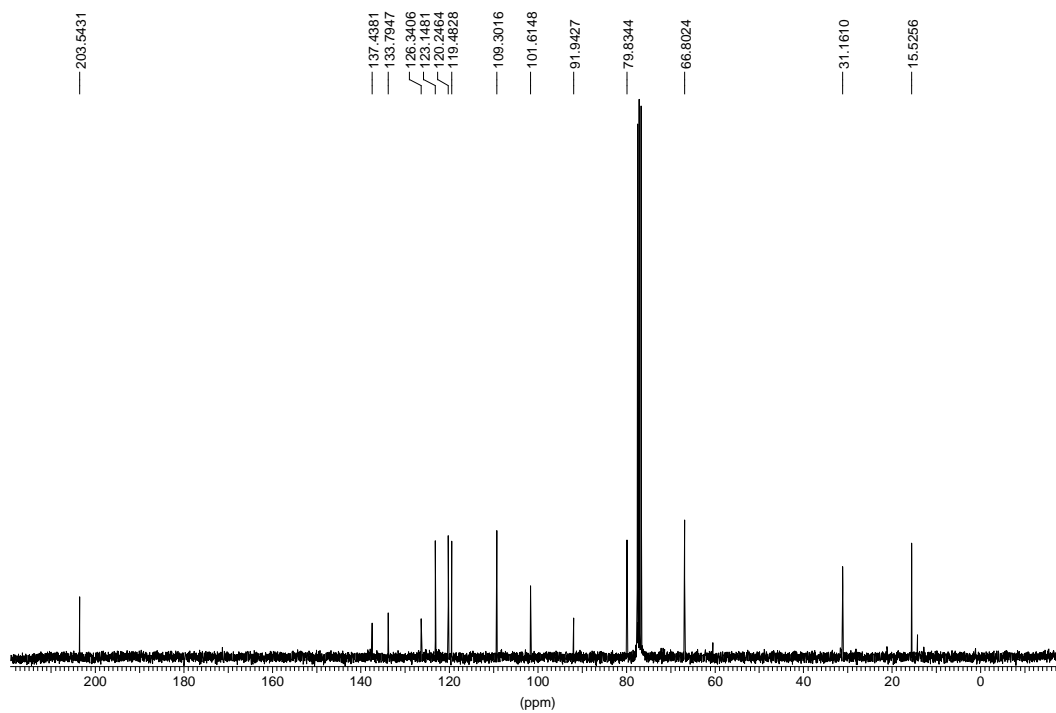

Q98C278E

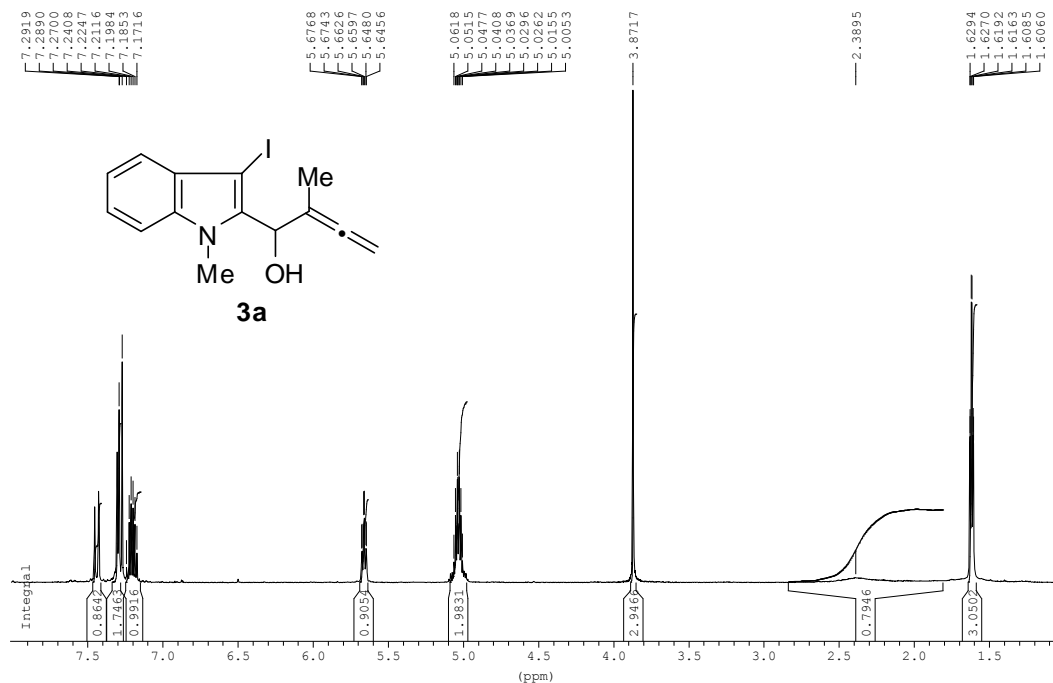

Q98C278E

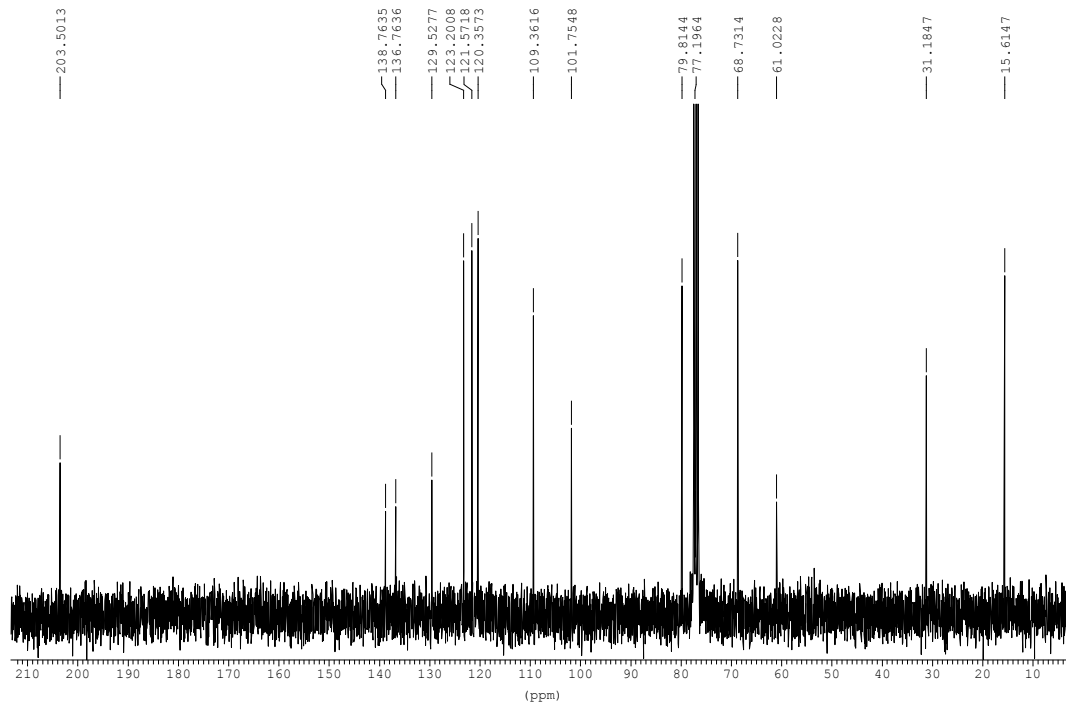

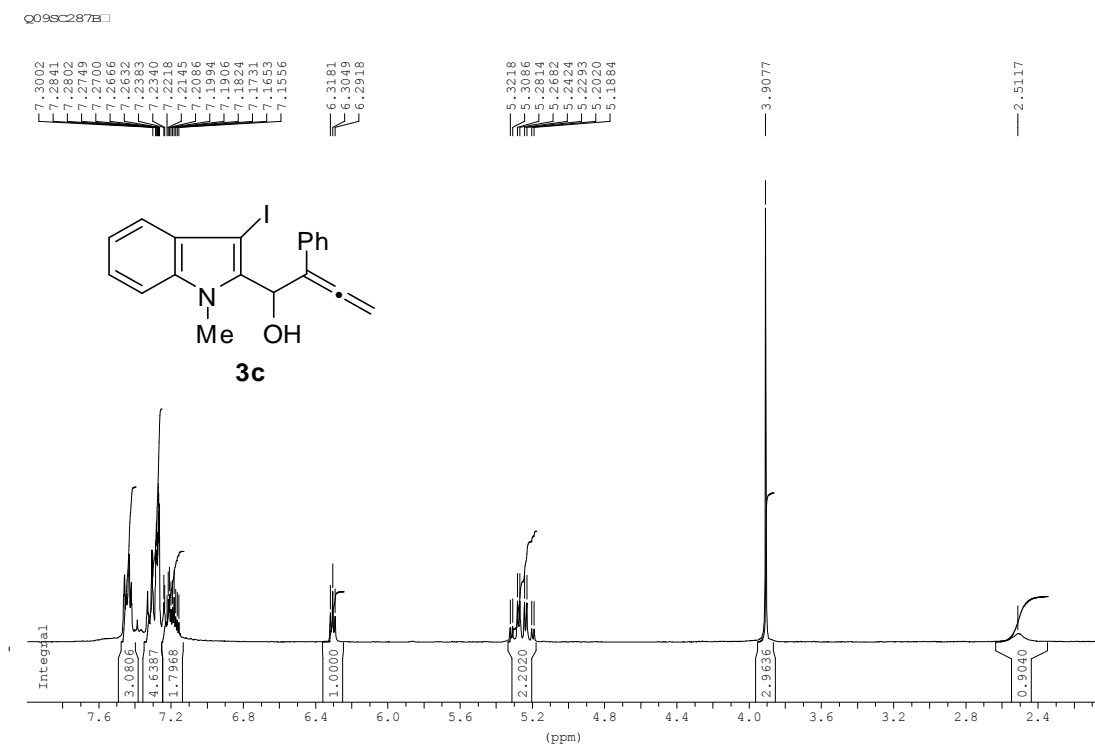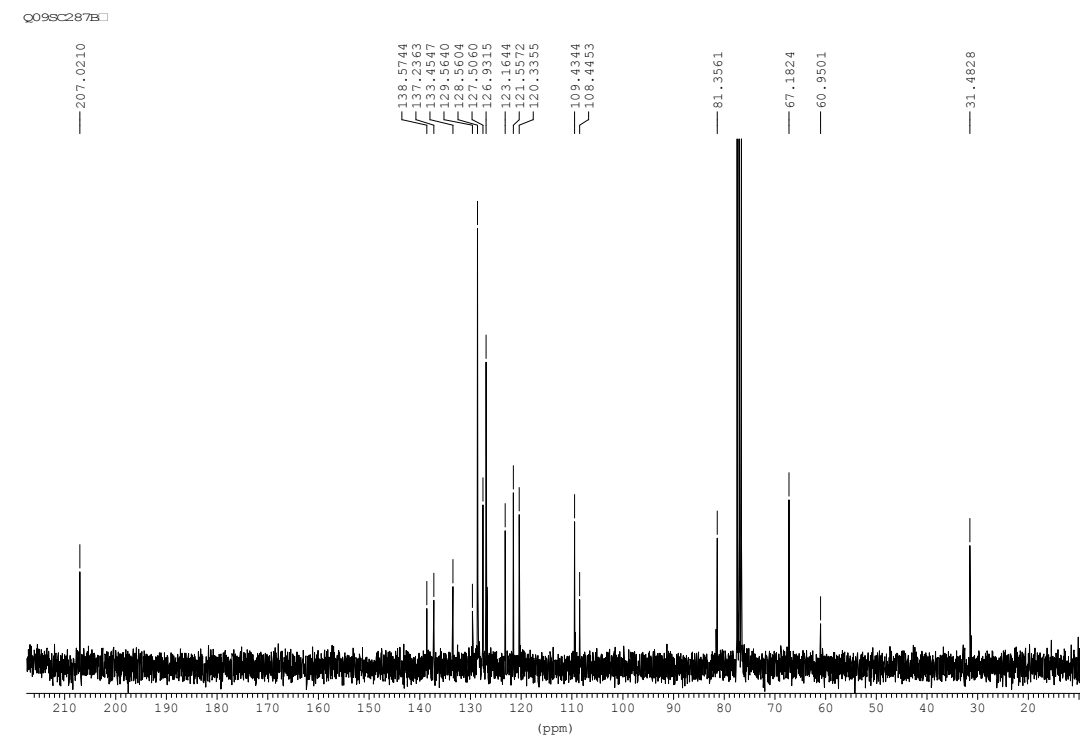

Q09SC481F

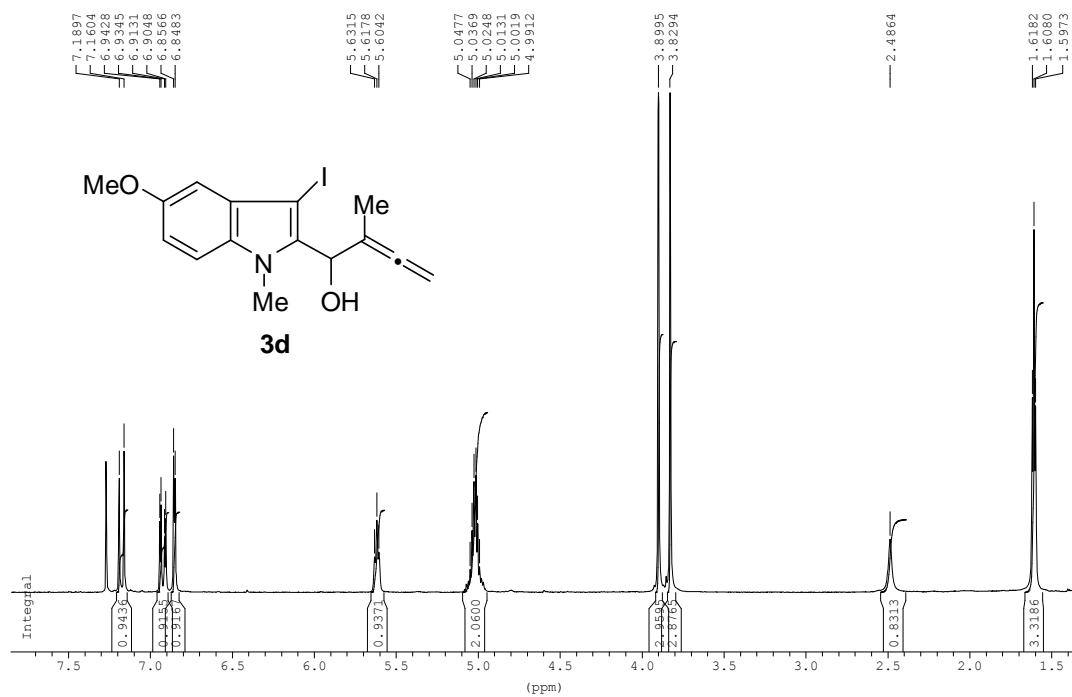

Q09SC481F

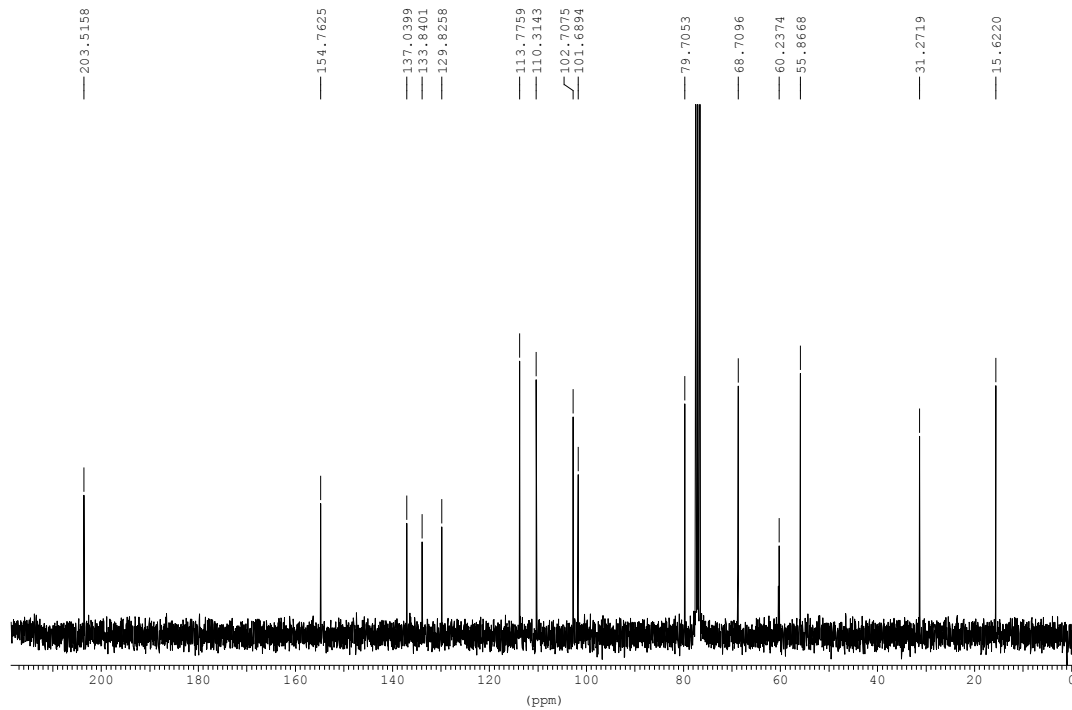

Q098C495E

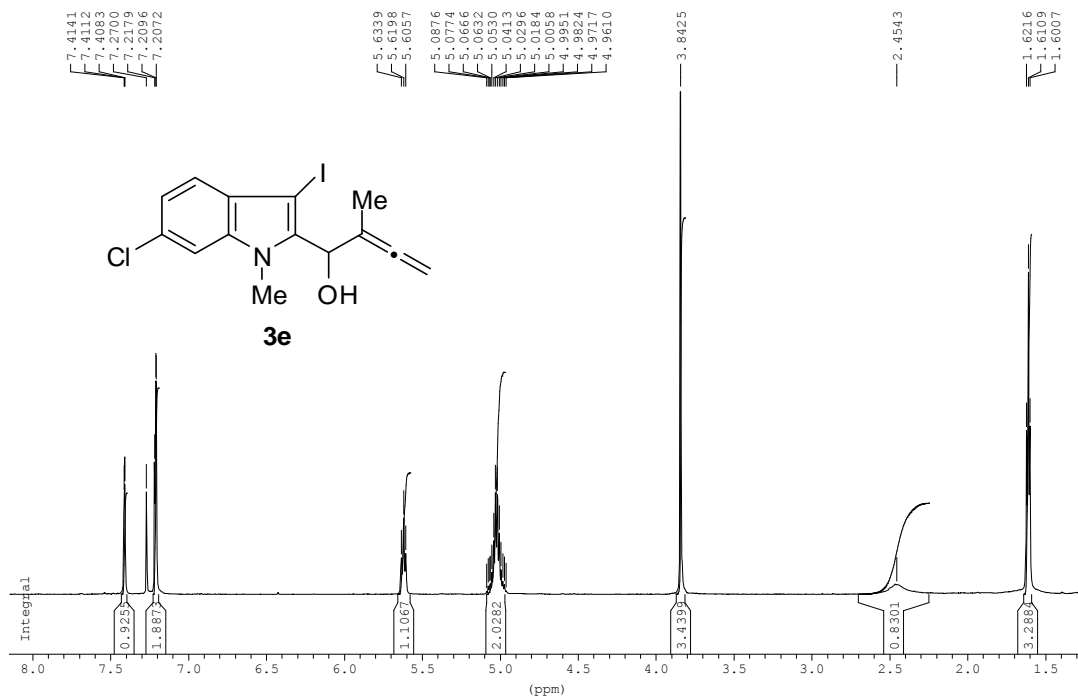

Q098C495E

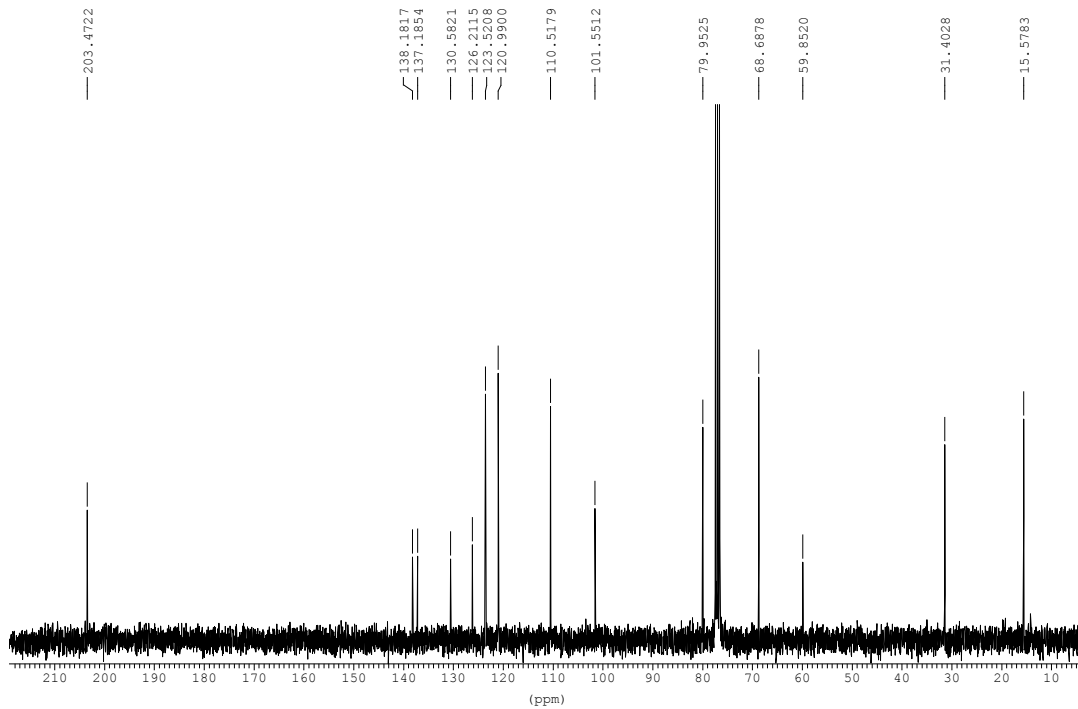

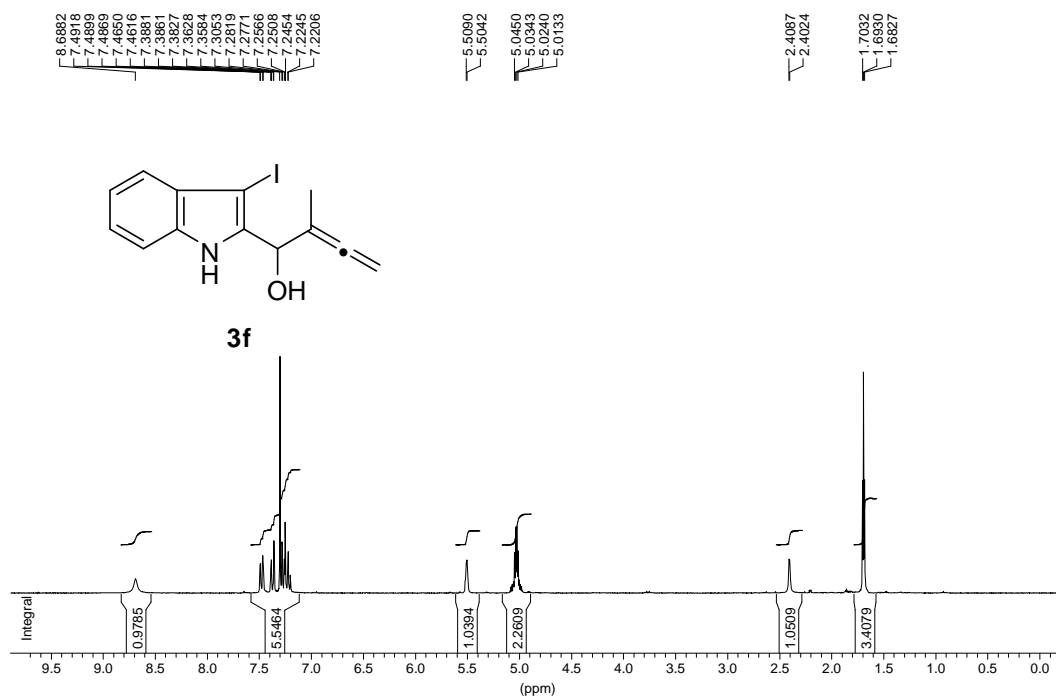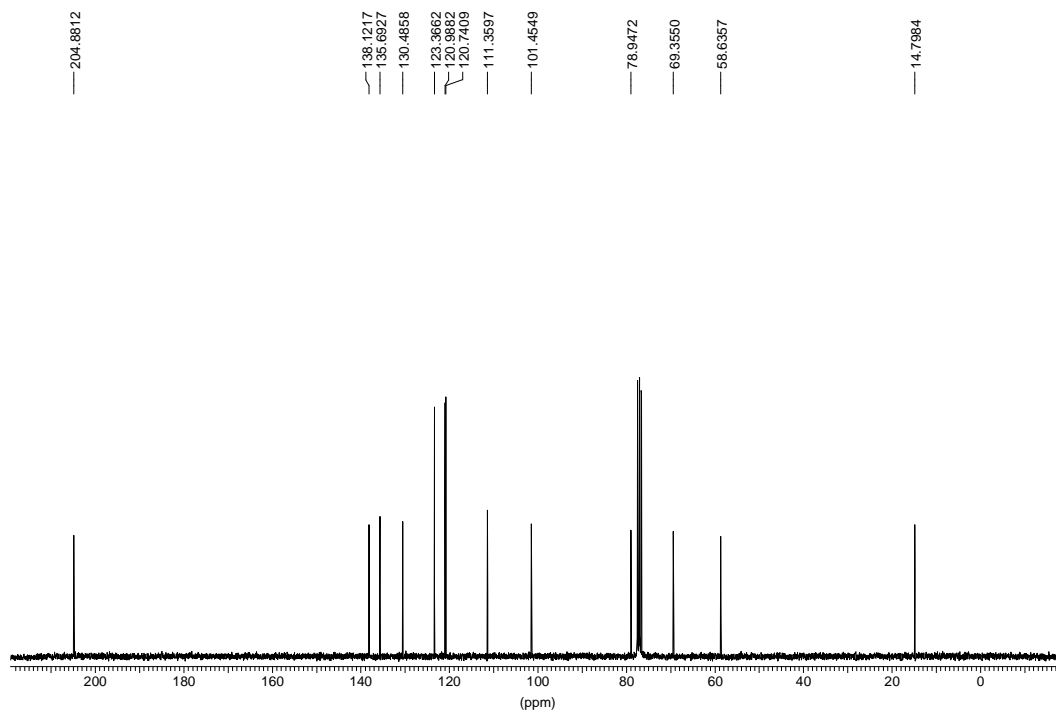

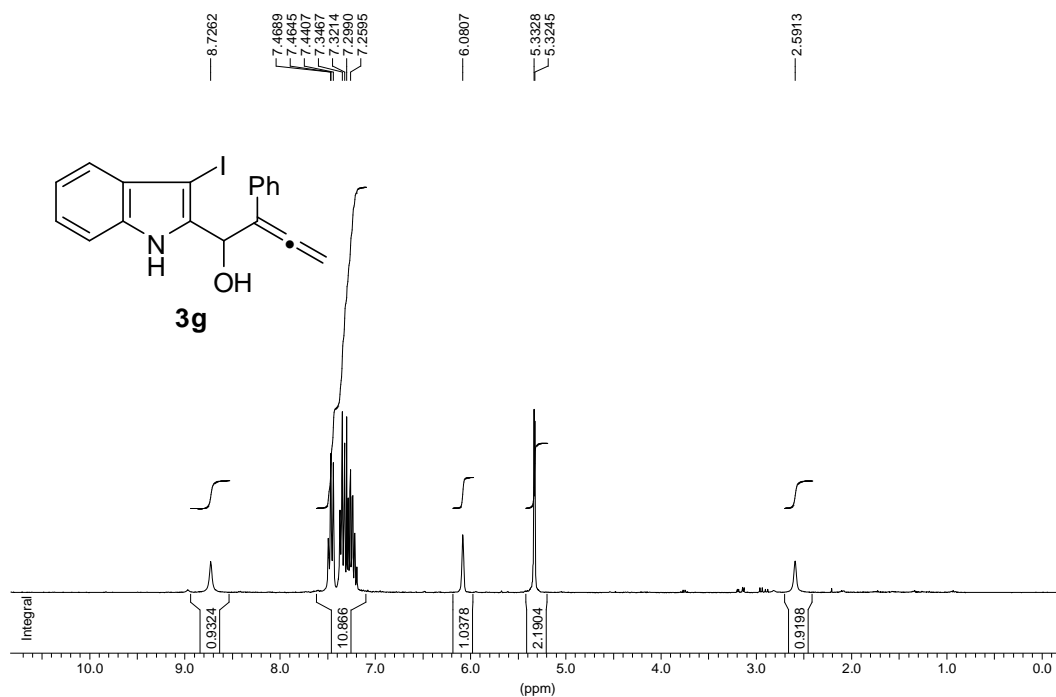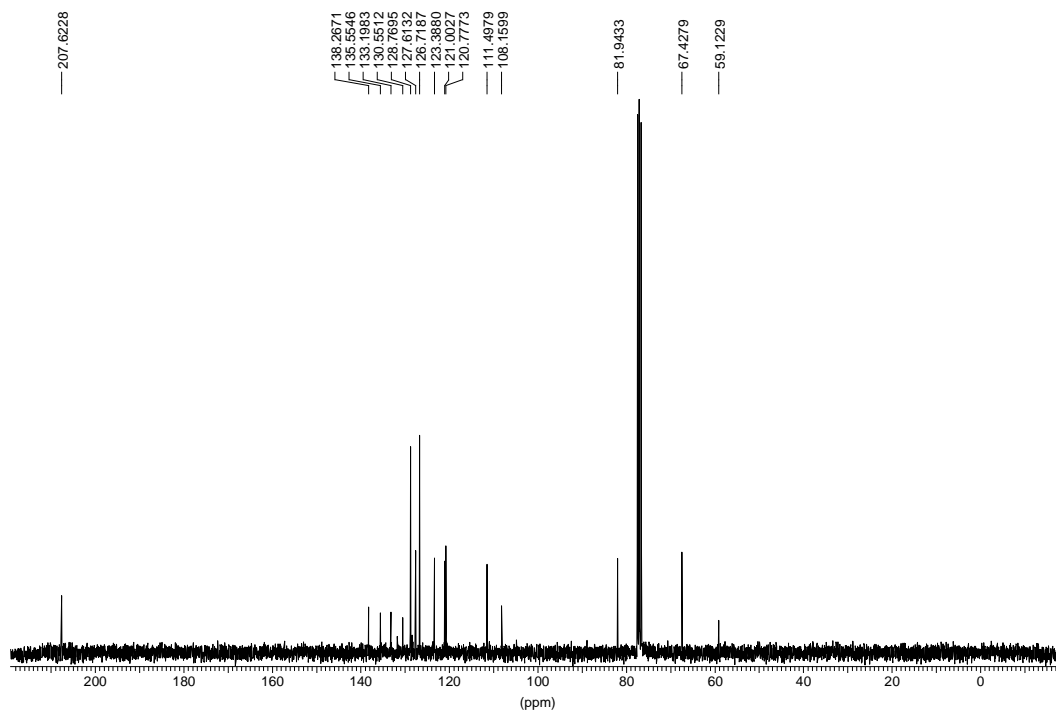



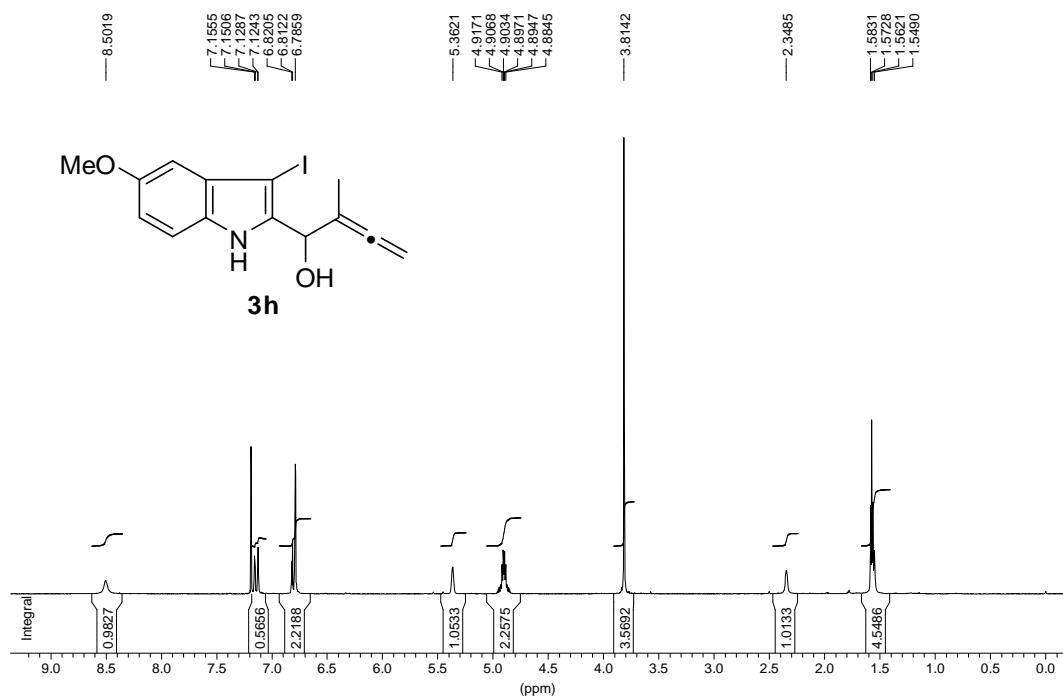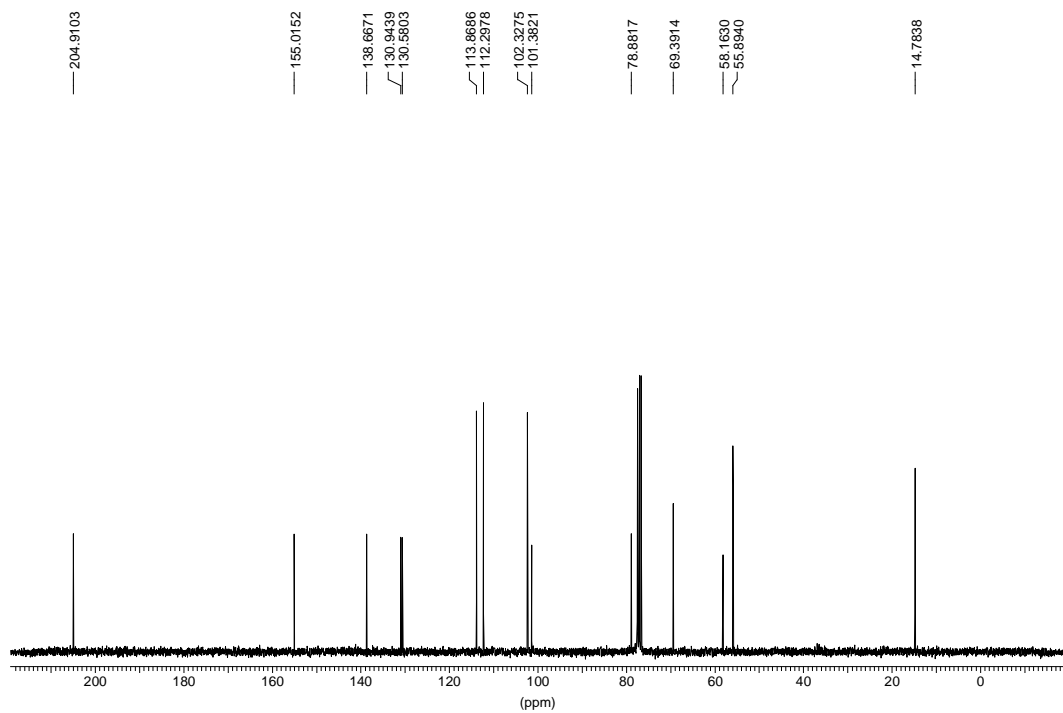

Q098c170E

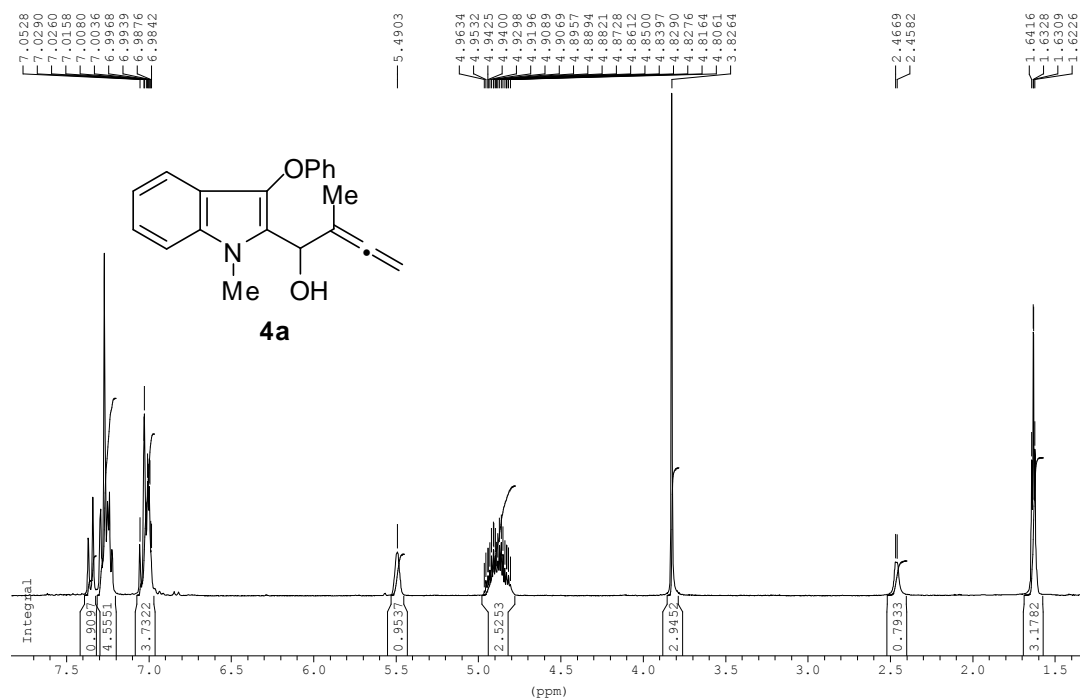

Q098c171E

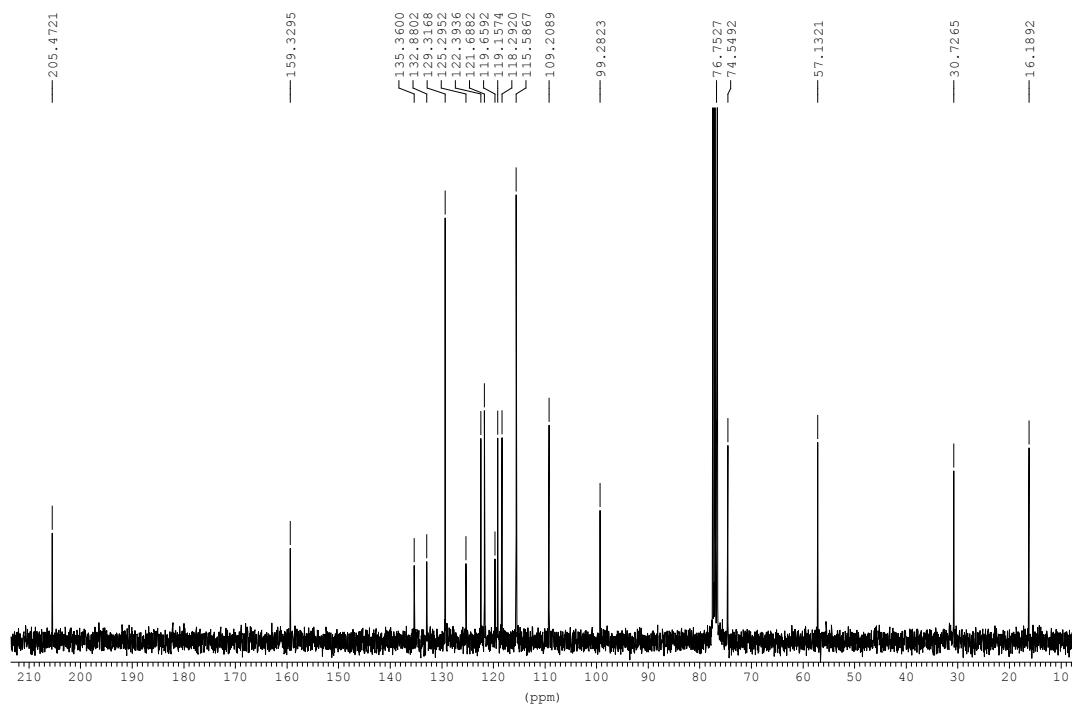

Q098c171F

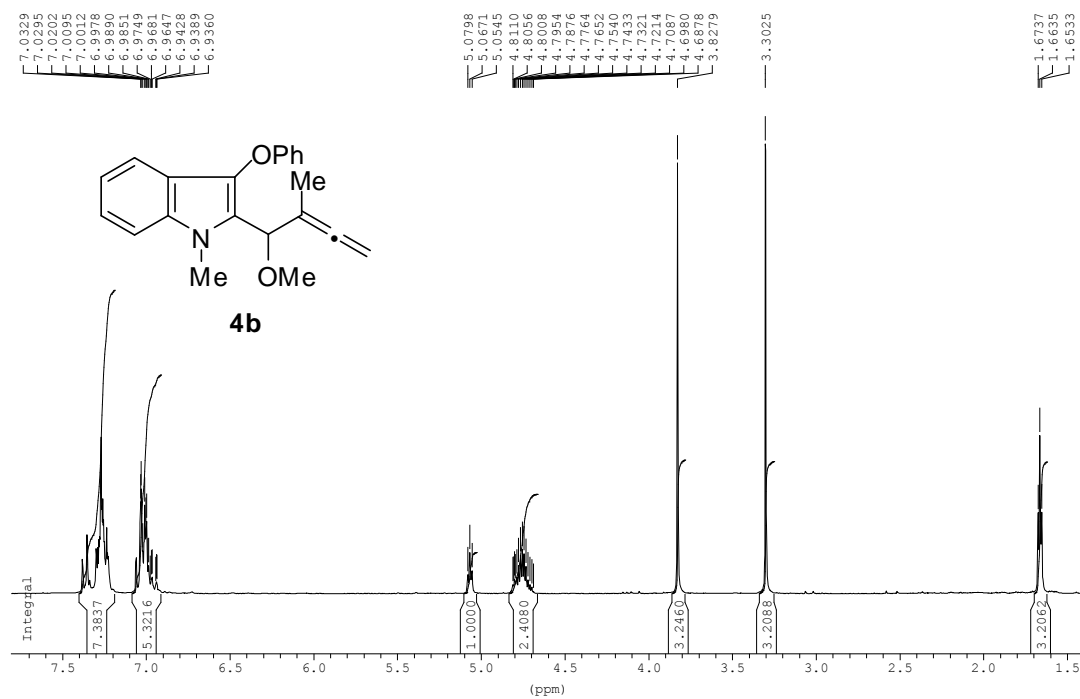

Q098c171F

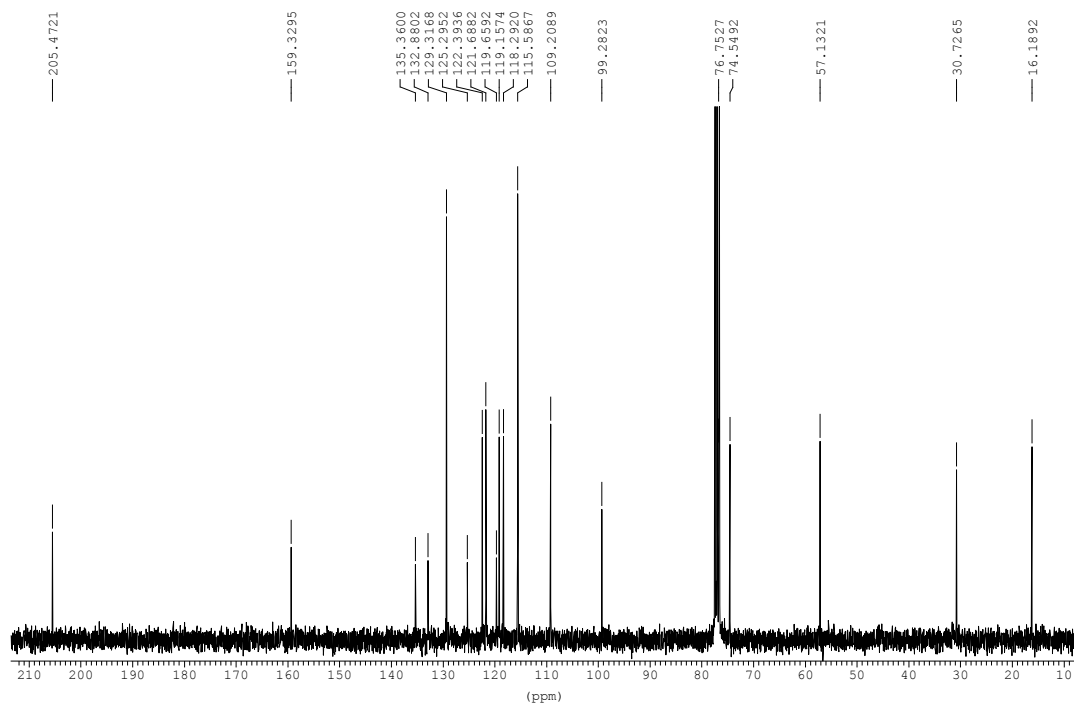

Q98C582E

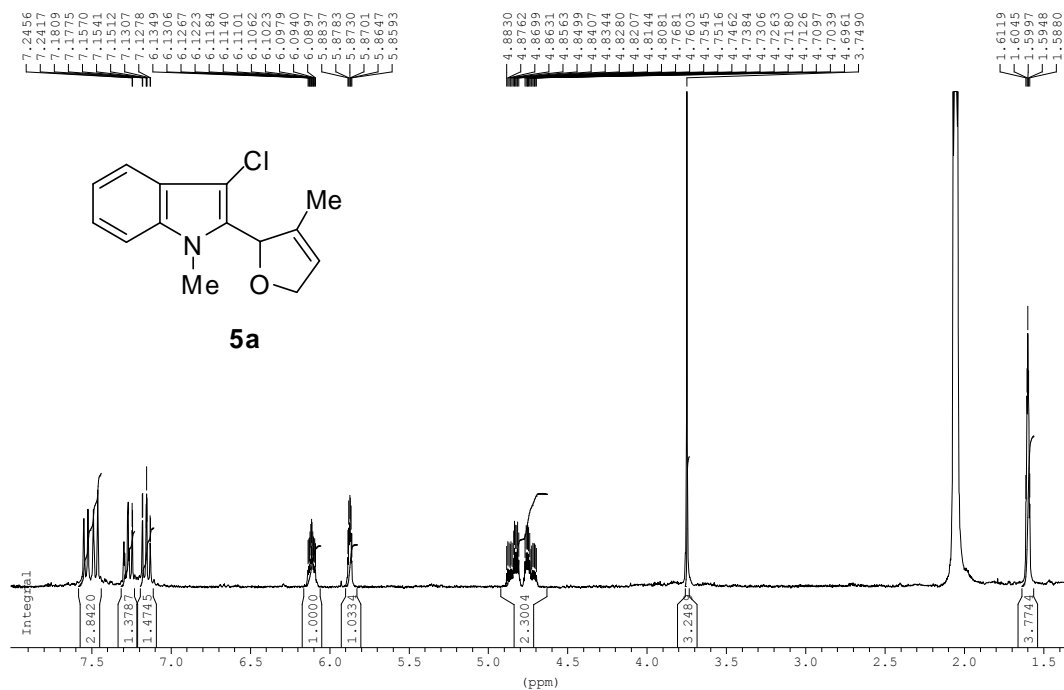

Q98C582E

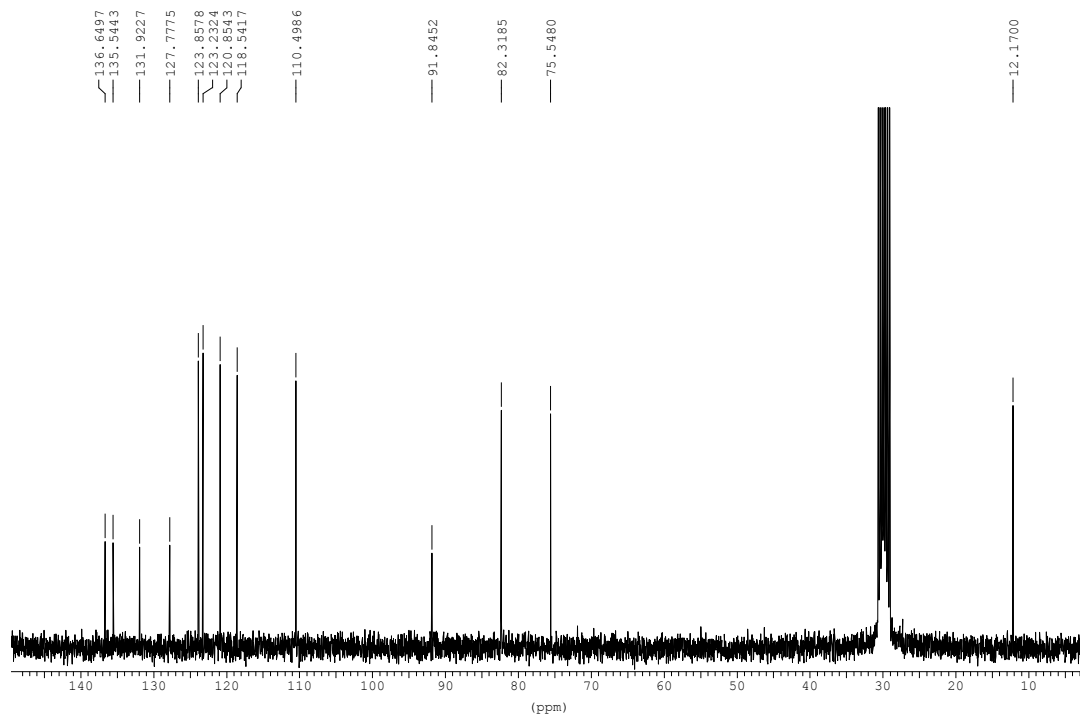

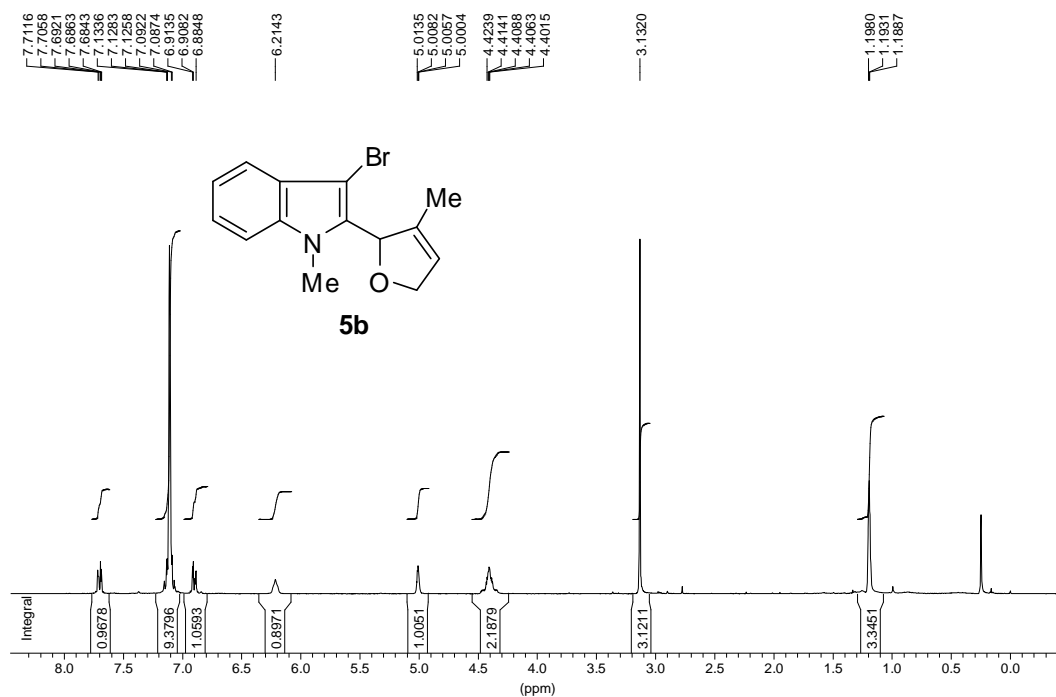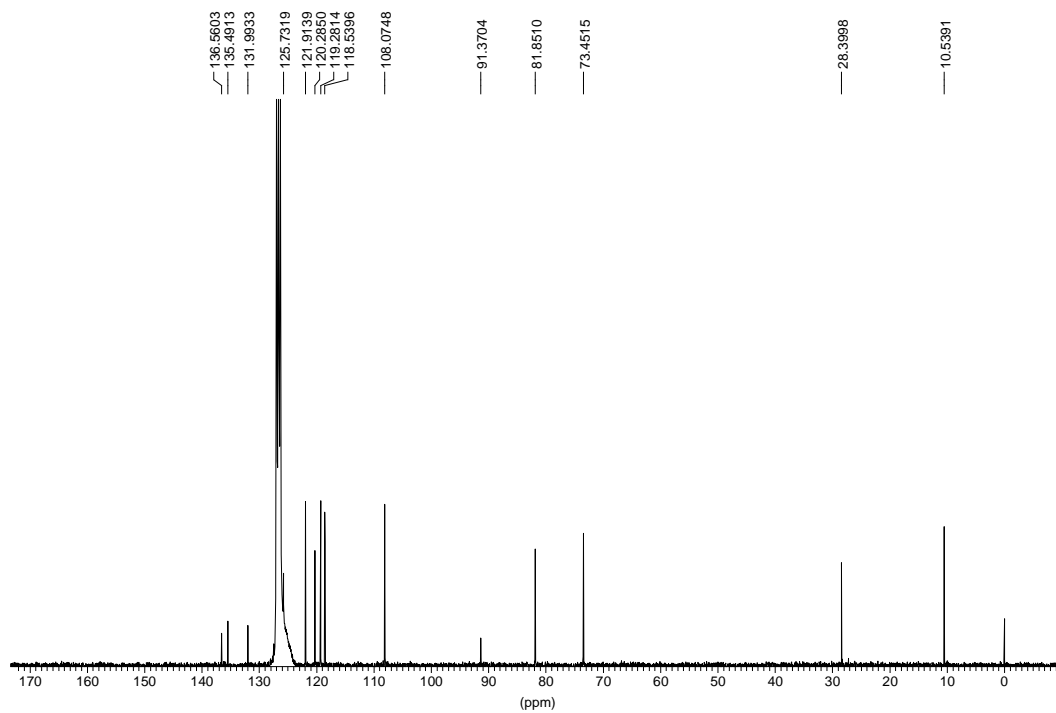

Q998C325C

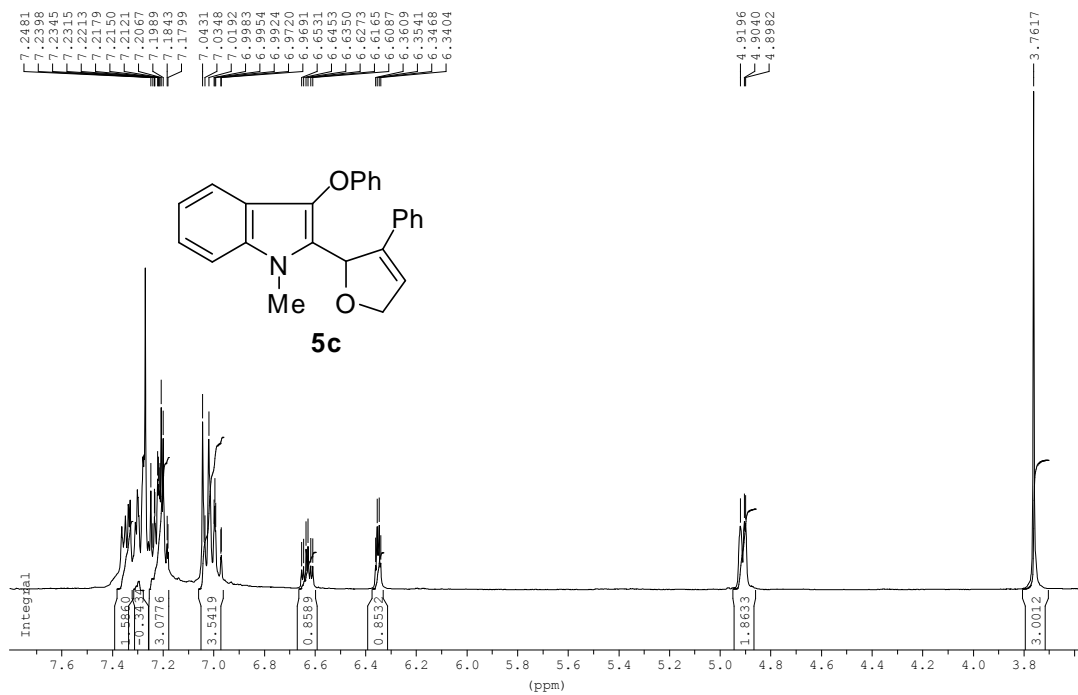

Q998C325C

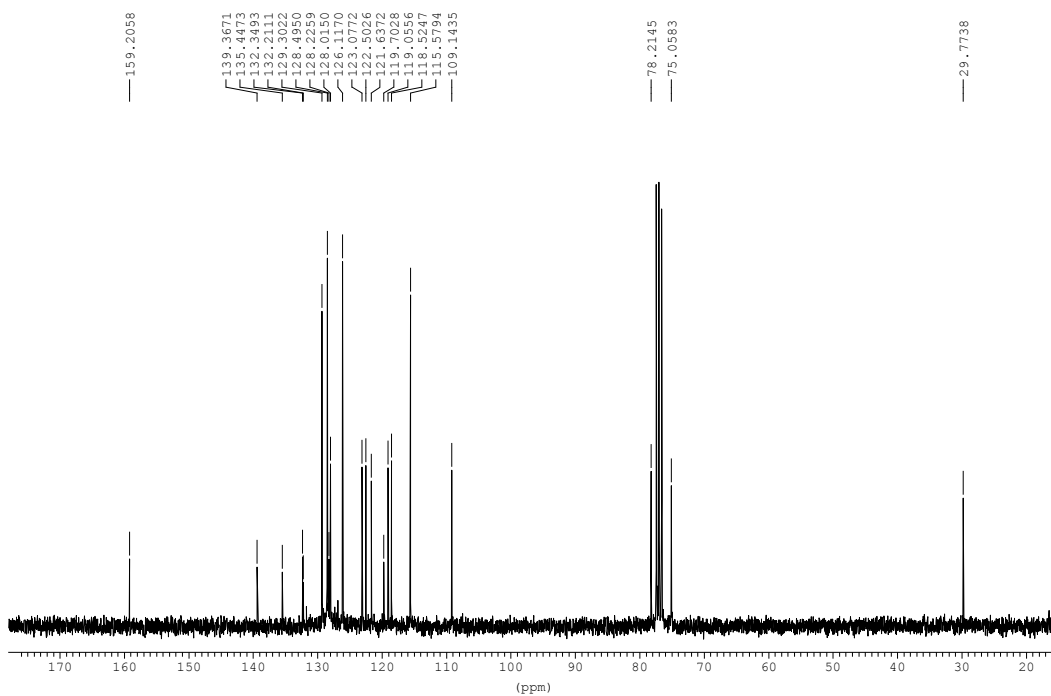

Q09SC582A

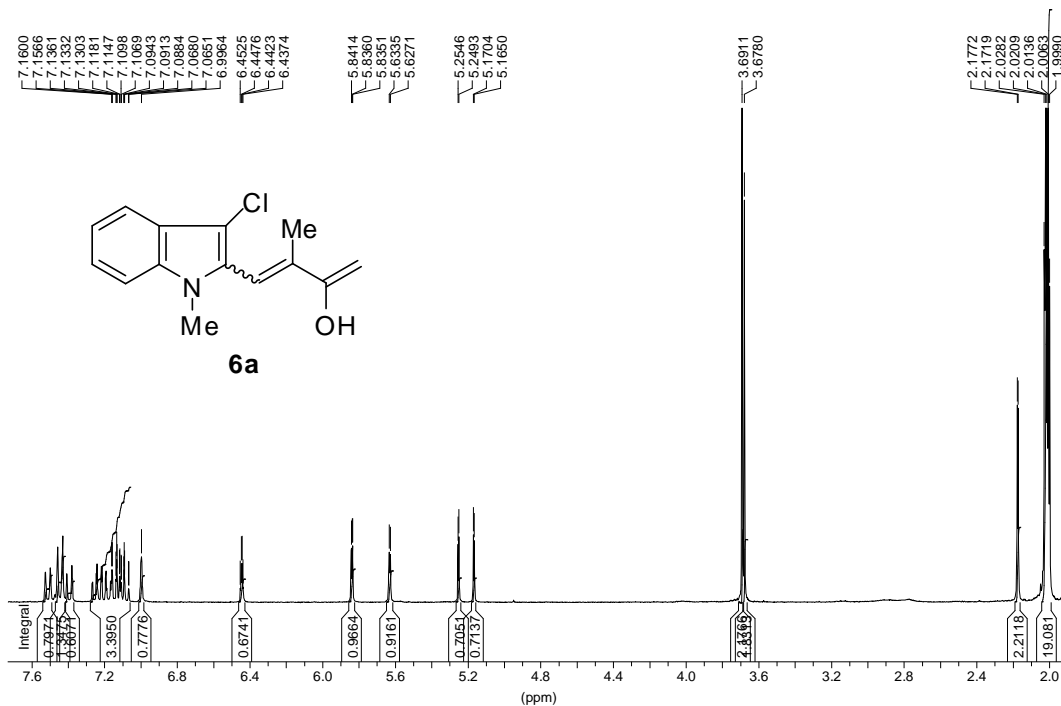

Q09SC582A

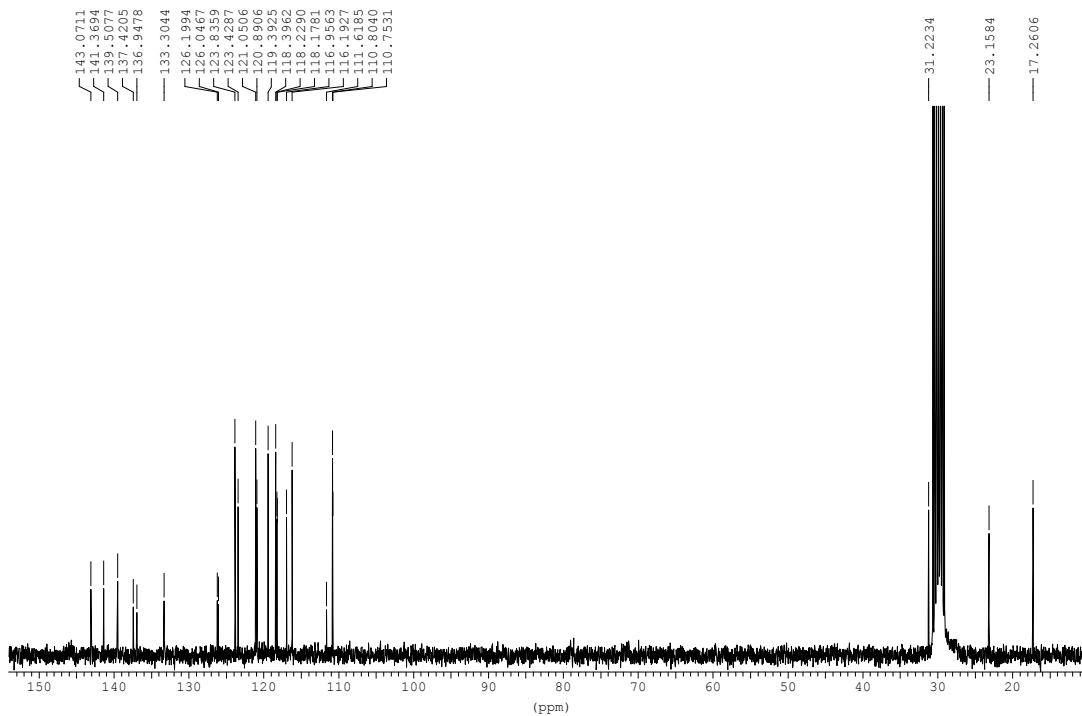

Q98C573B

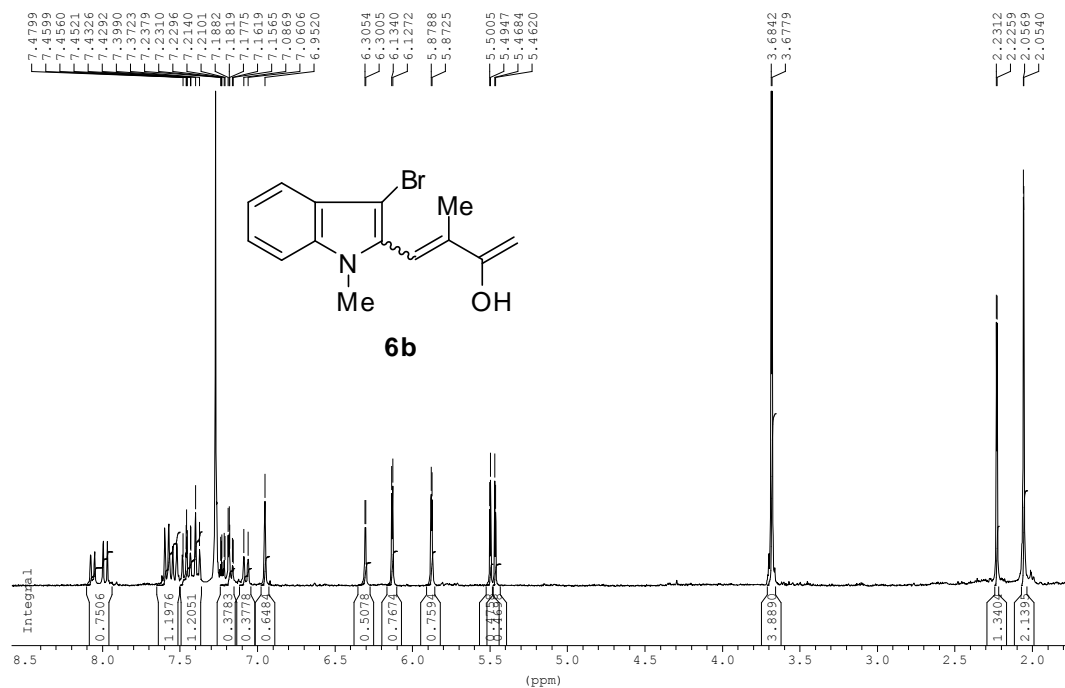

Q98C573B

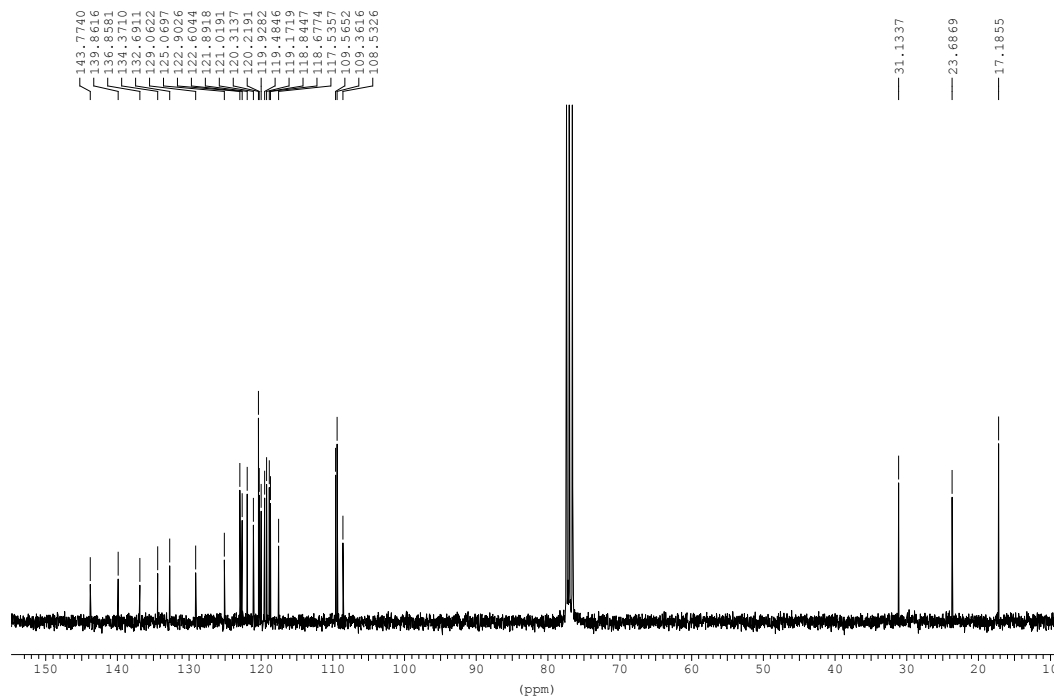



Q098C356RB

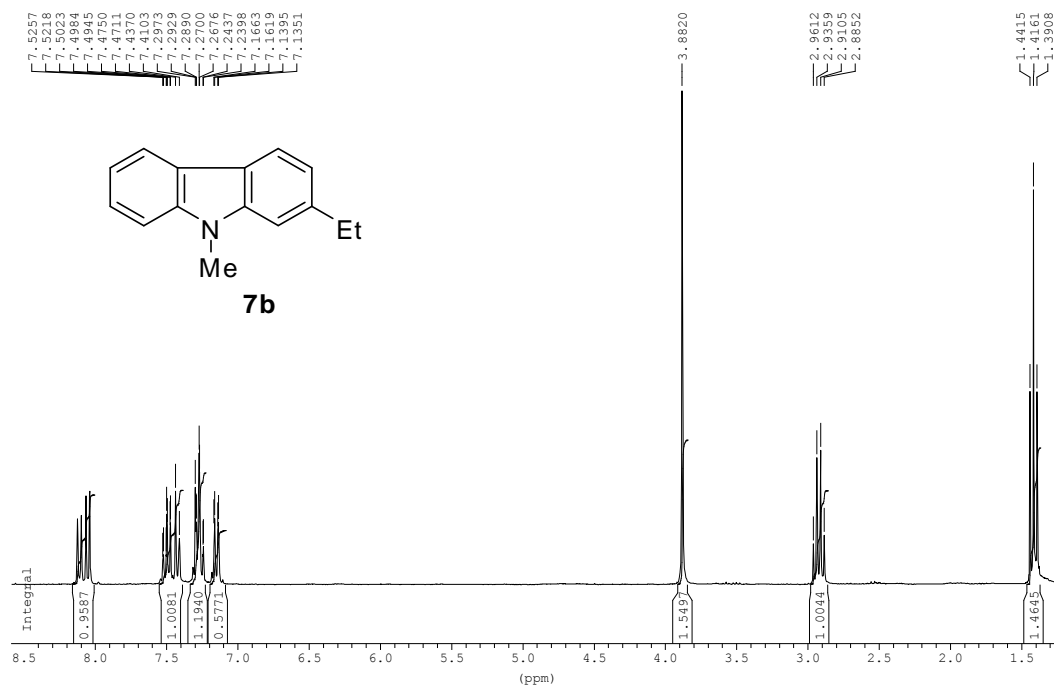

Q098C356RB

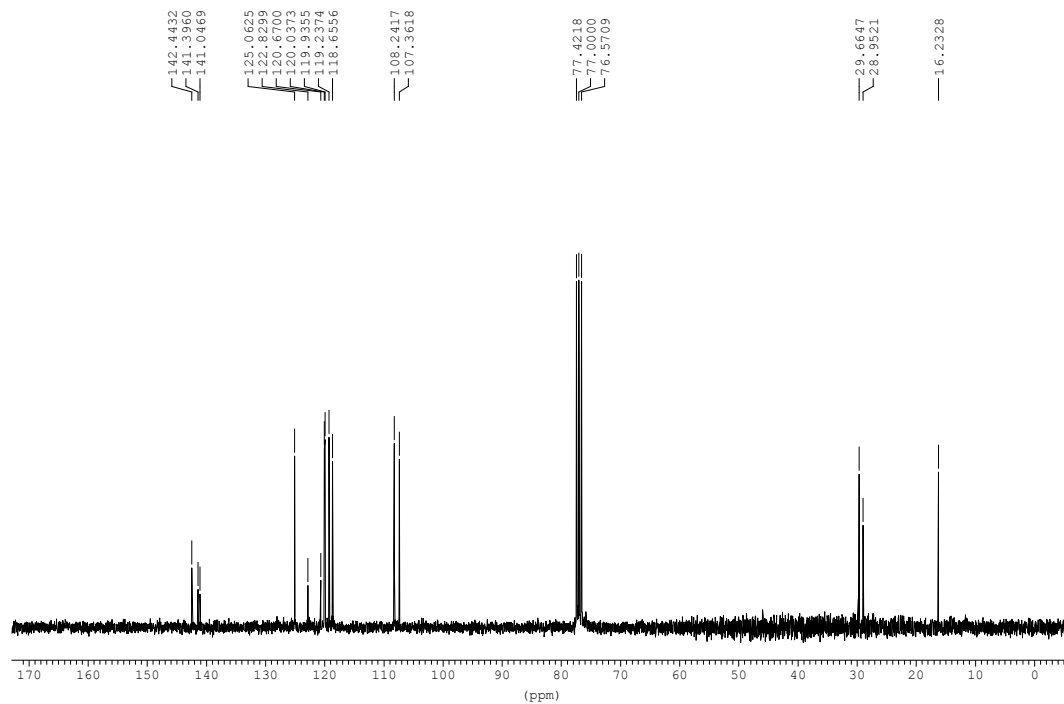

Q98C483A

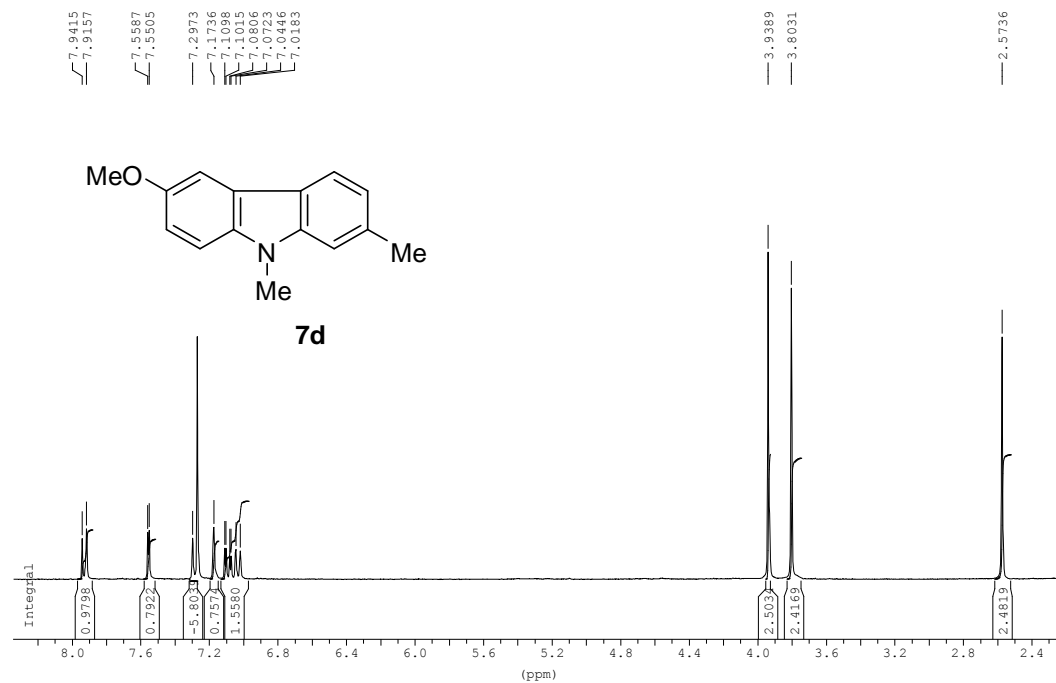

Q98C483A

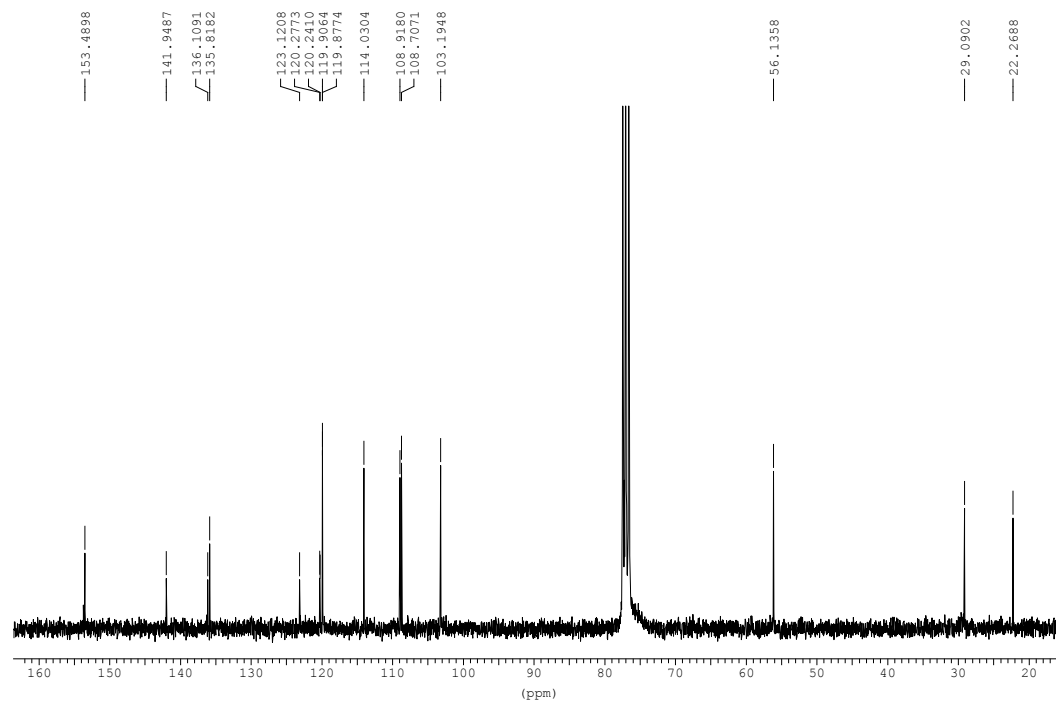

Q098c500c

8.0043  
7.9975  
7.9317  
7.9055  
7.4122  
7.3835  
7.3766  
7.2856  
7.2816  
7.2427  
7.2345  
7.1863  
7.1064  
7.0801

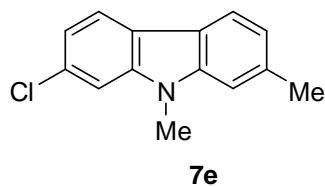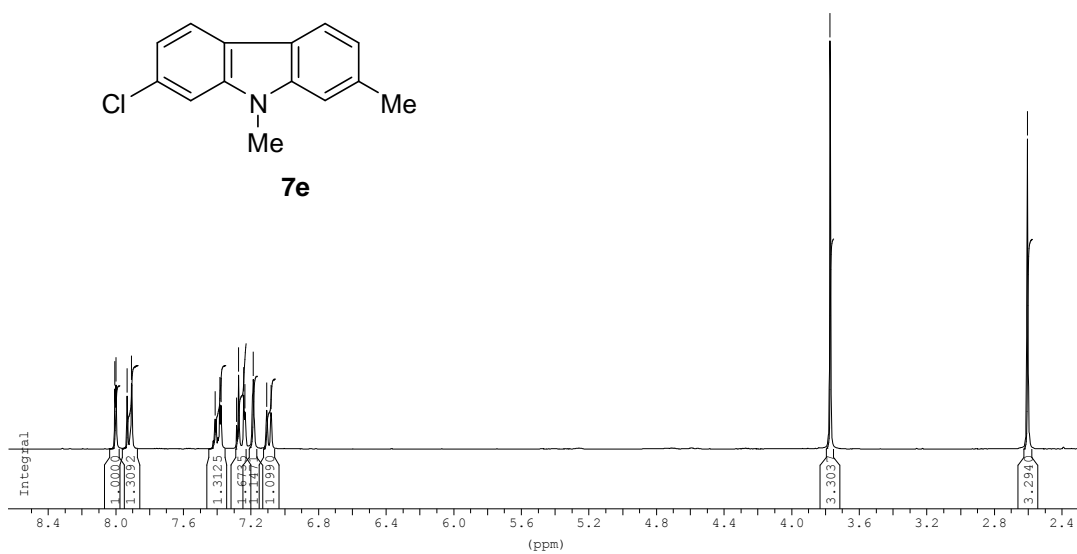

Q098c500c

141.7742  
139.2143  
136.6109  
124.9752  
124.1171  
123.8480  
120.6991  
120.0737  
119.5719  
119.4774  
109.1726  
108.8162  
29.0102  
22.2543

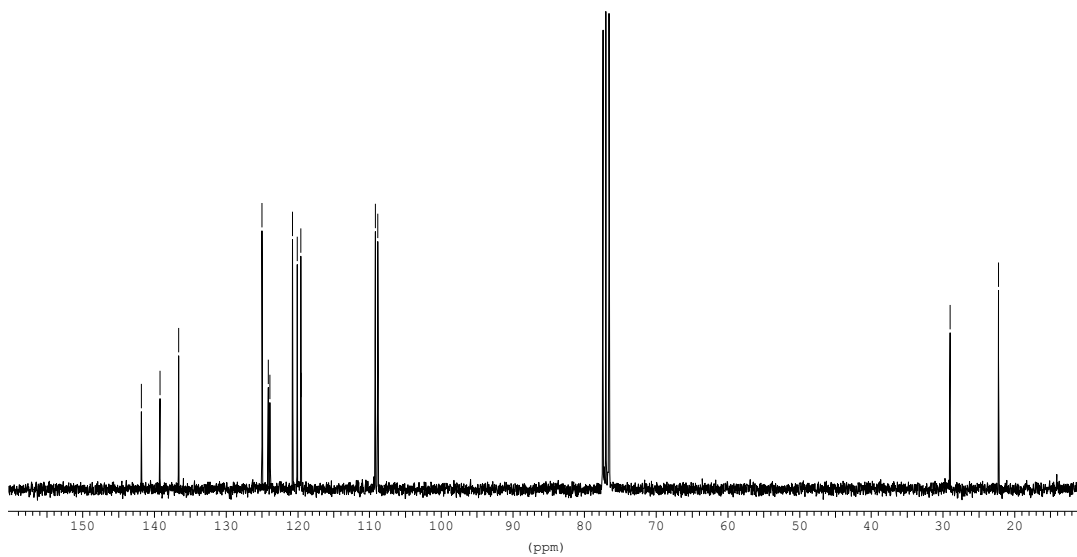

Q982810

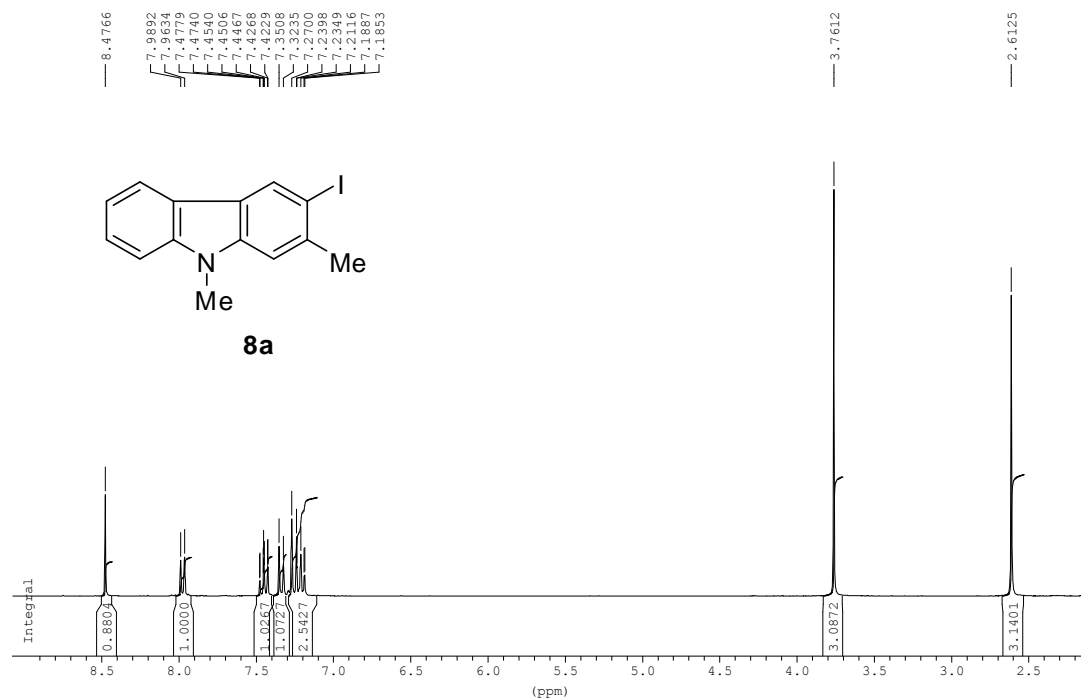

Q982810

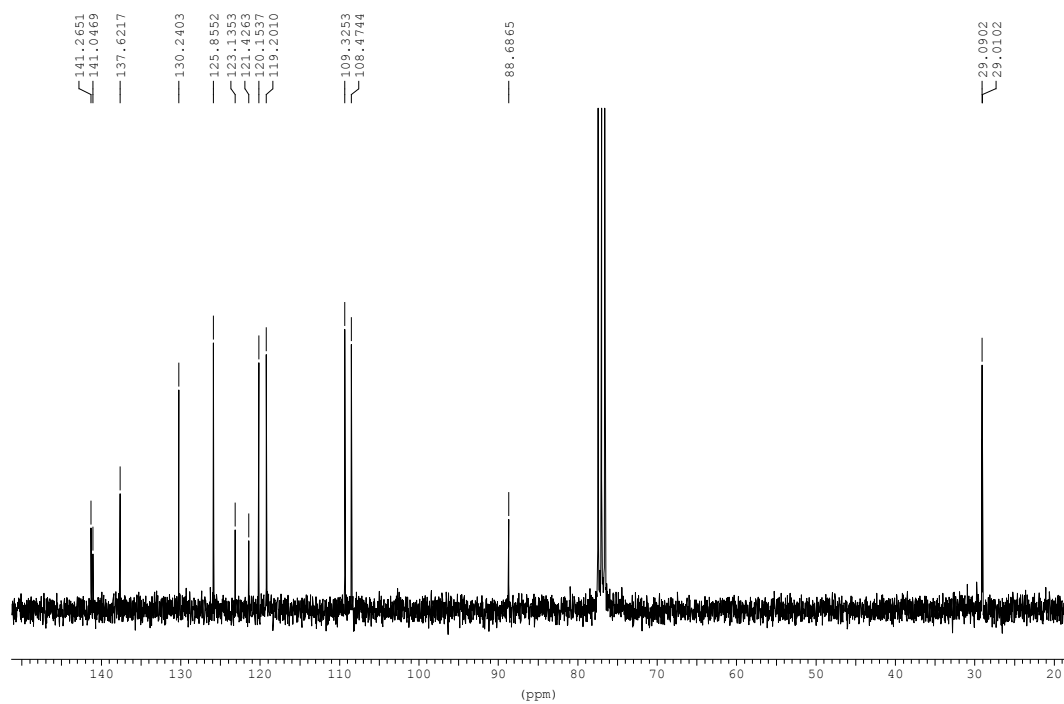

Q09SC356RA

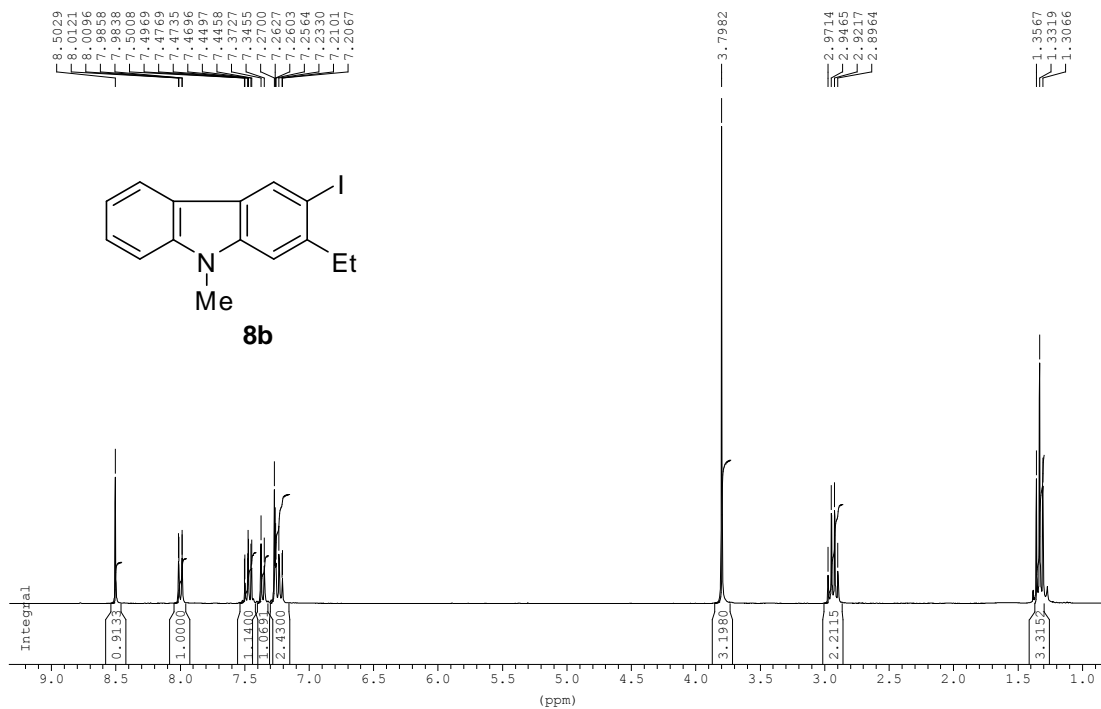

Q09SC356RA

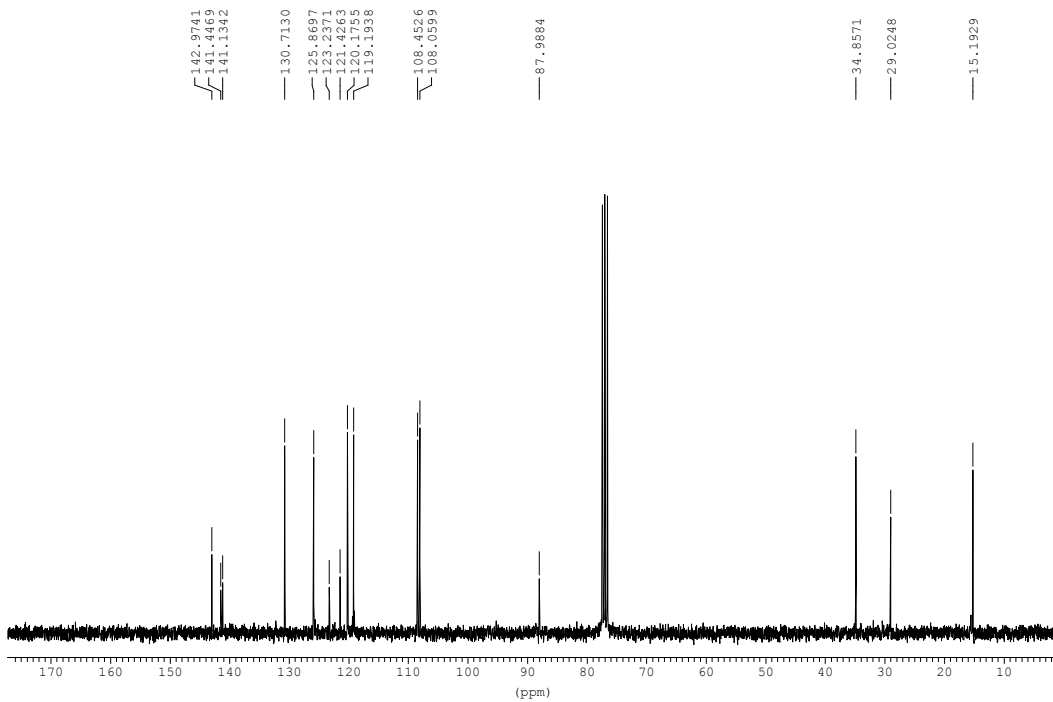

Q098C297B

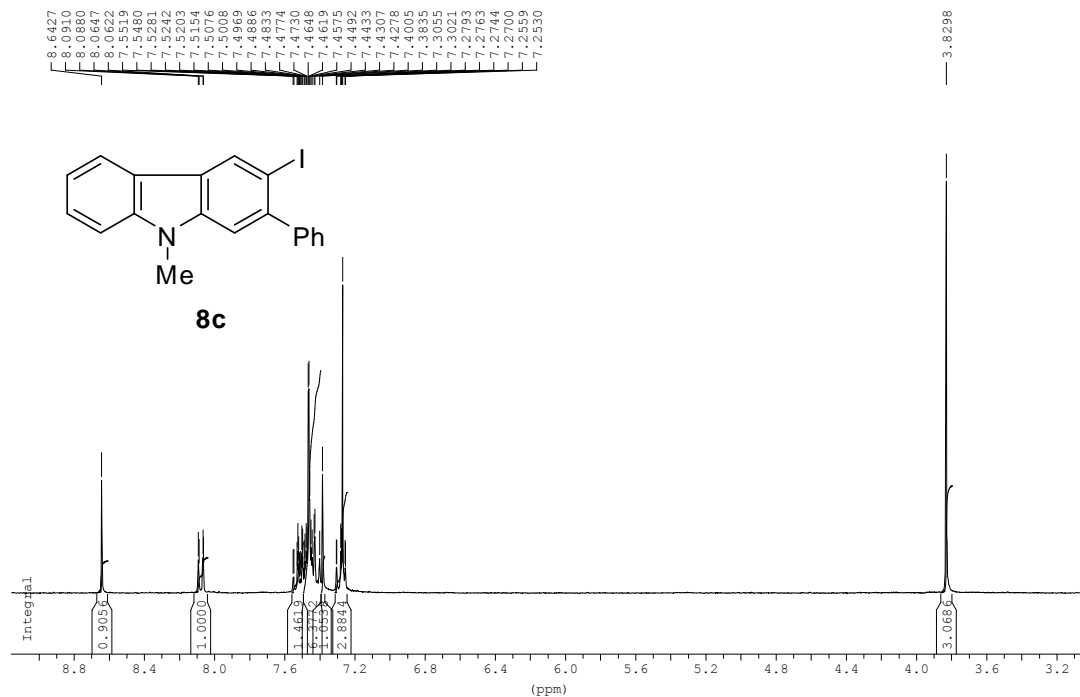

Q098C297B

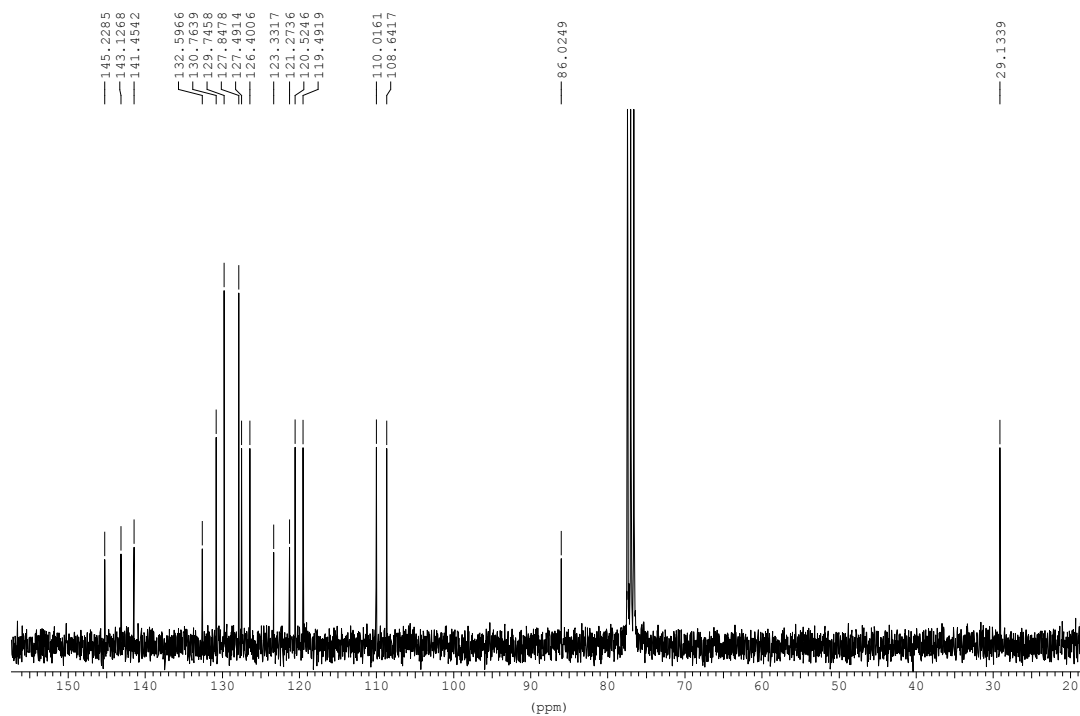

Q098C483C

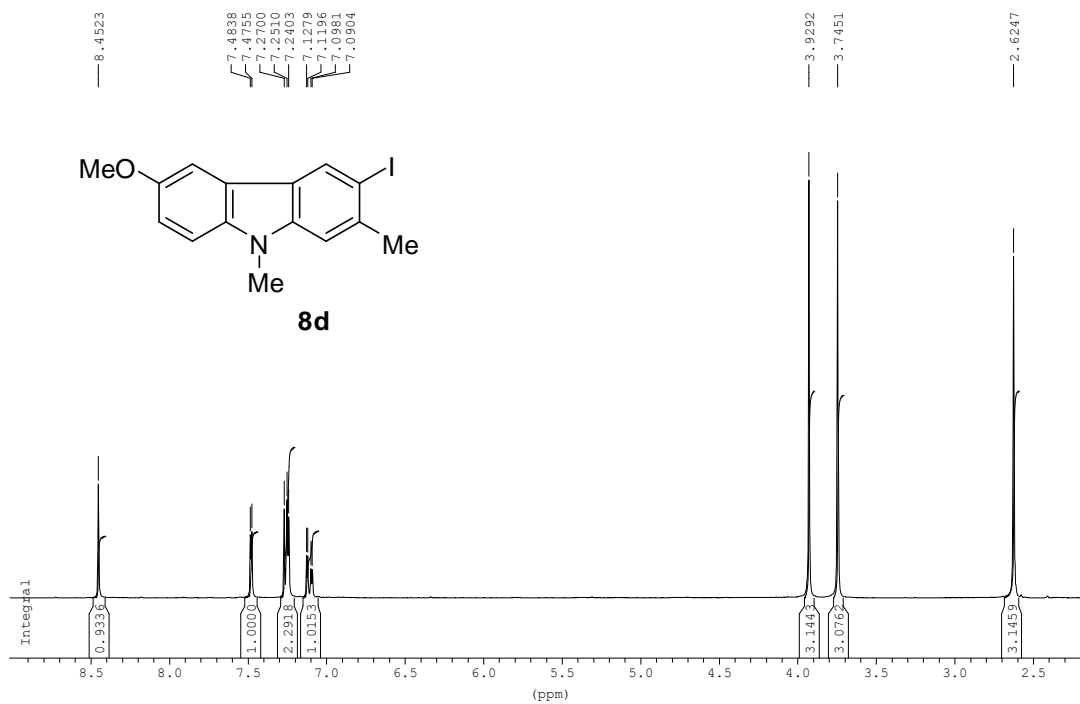

Q098C483C

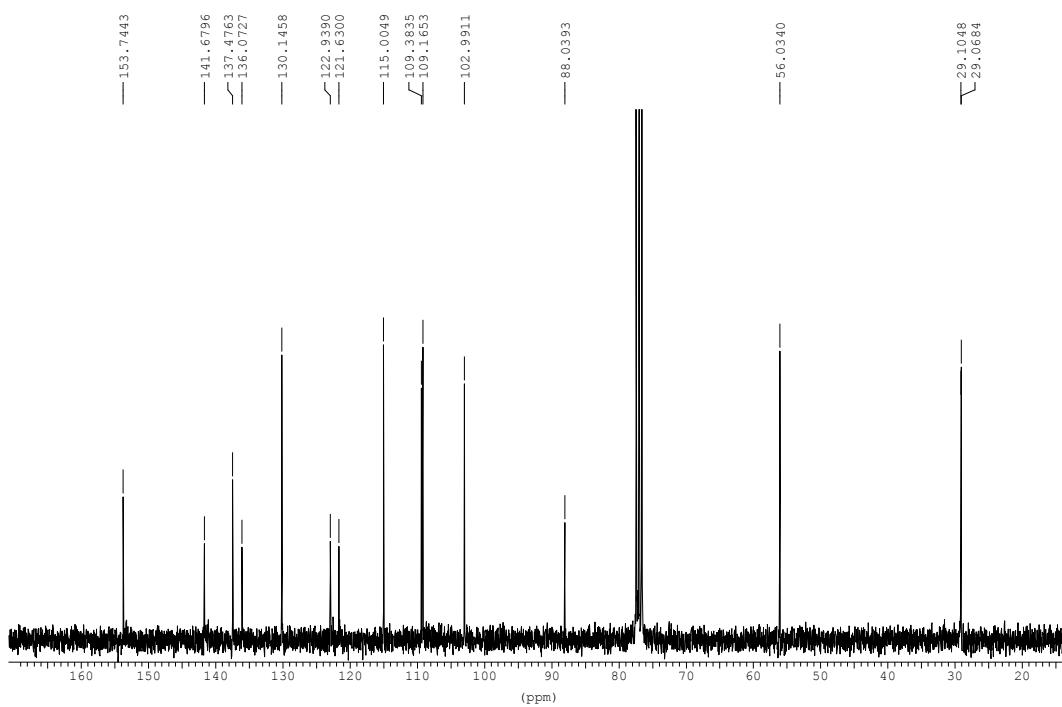

Q098C500RD1

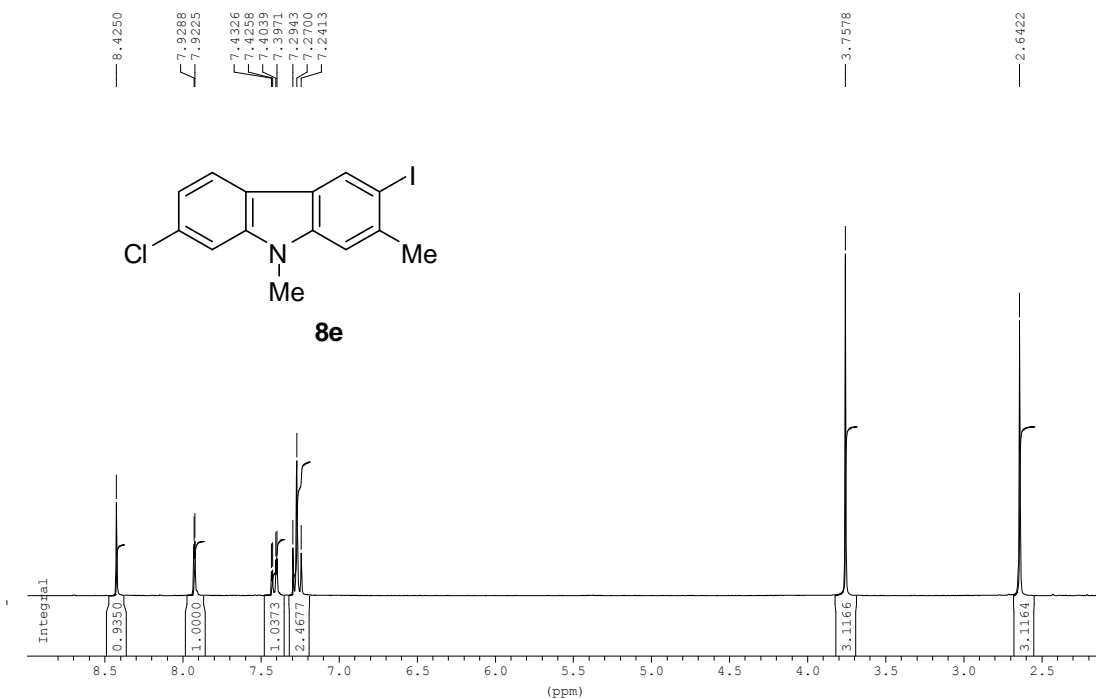

Q098C500RD1

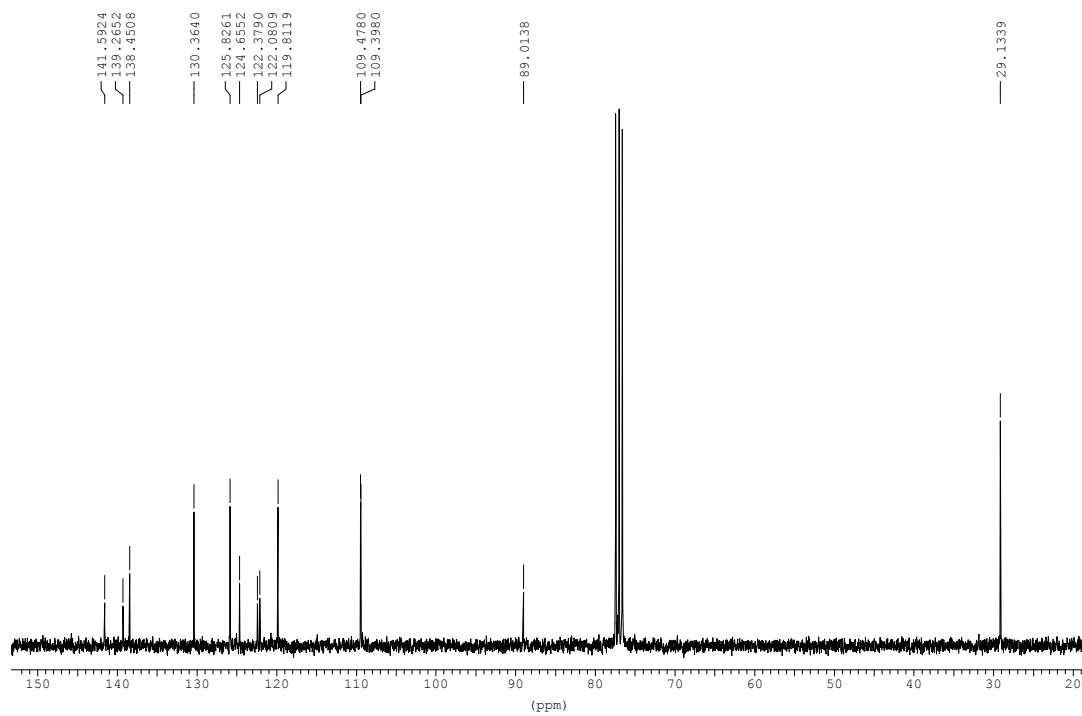



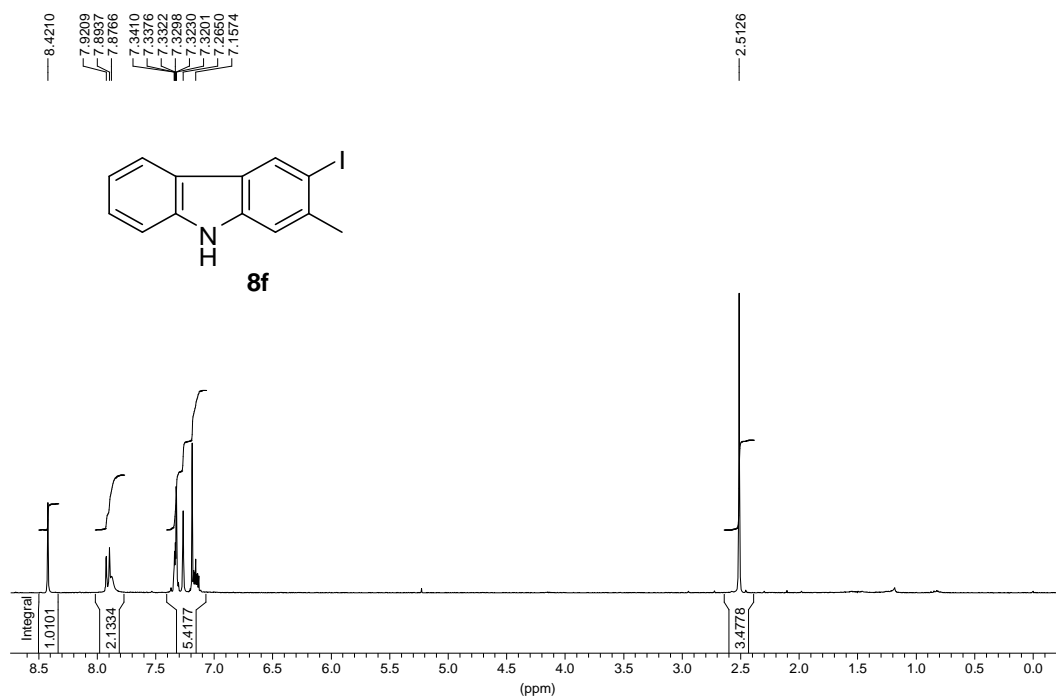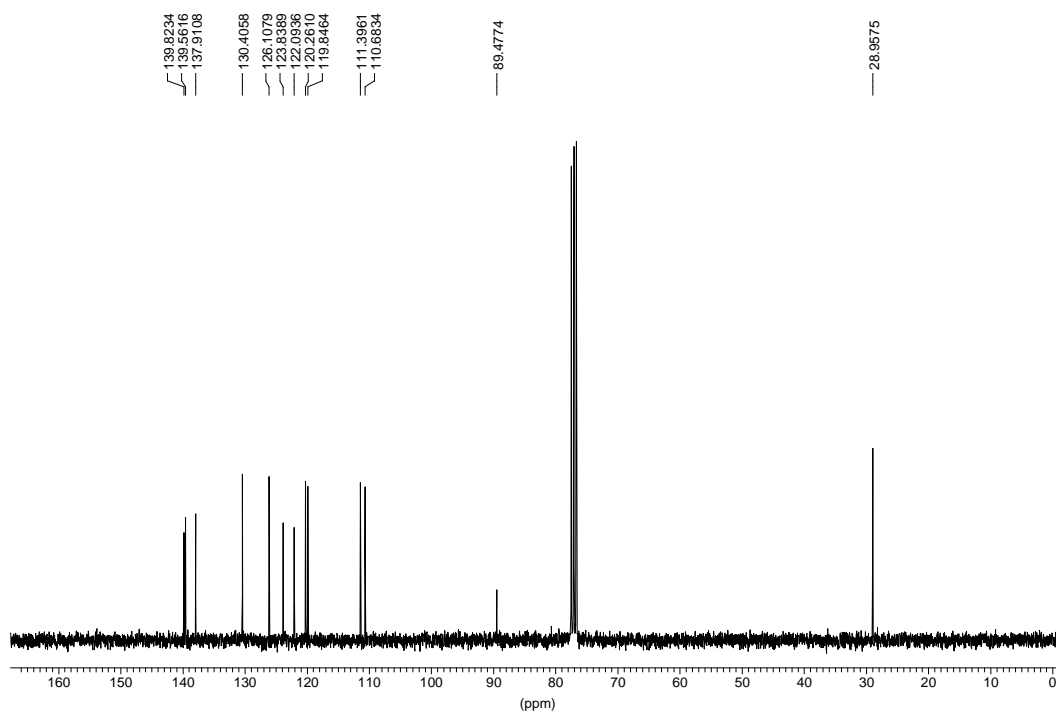

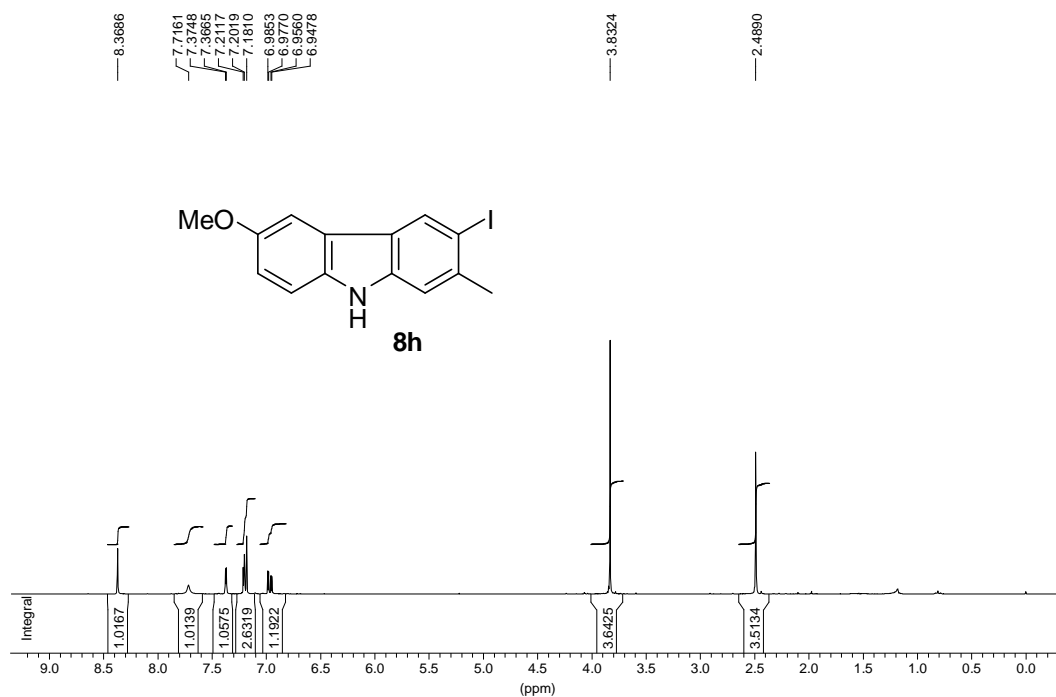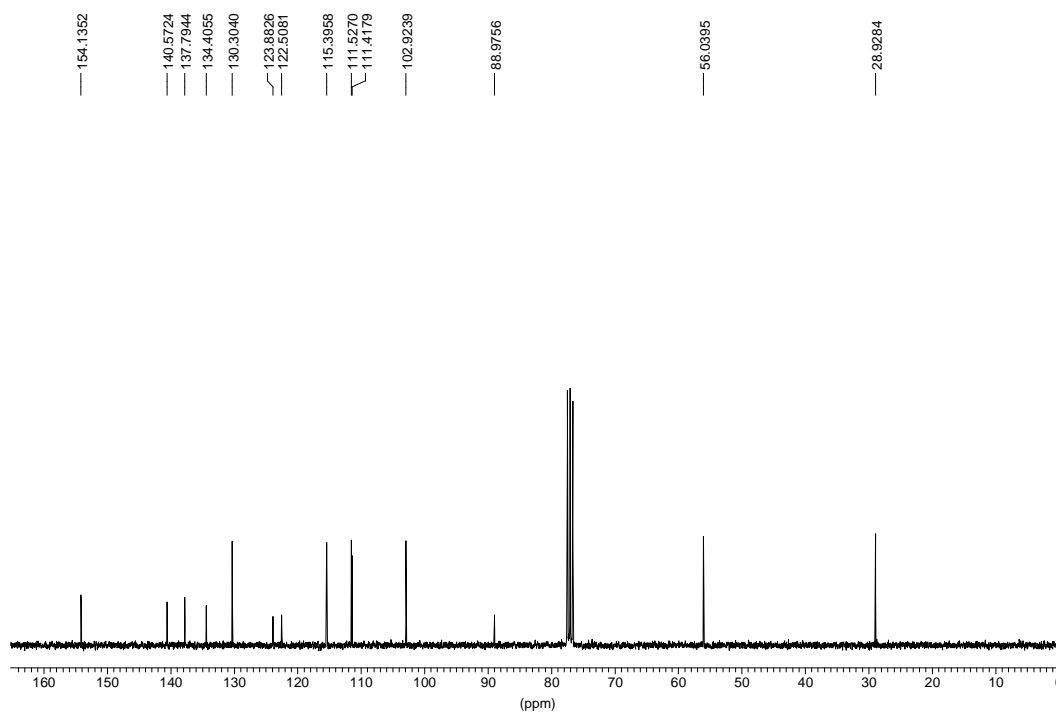

Q098C500RD2

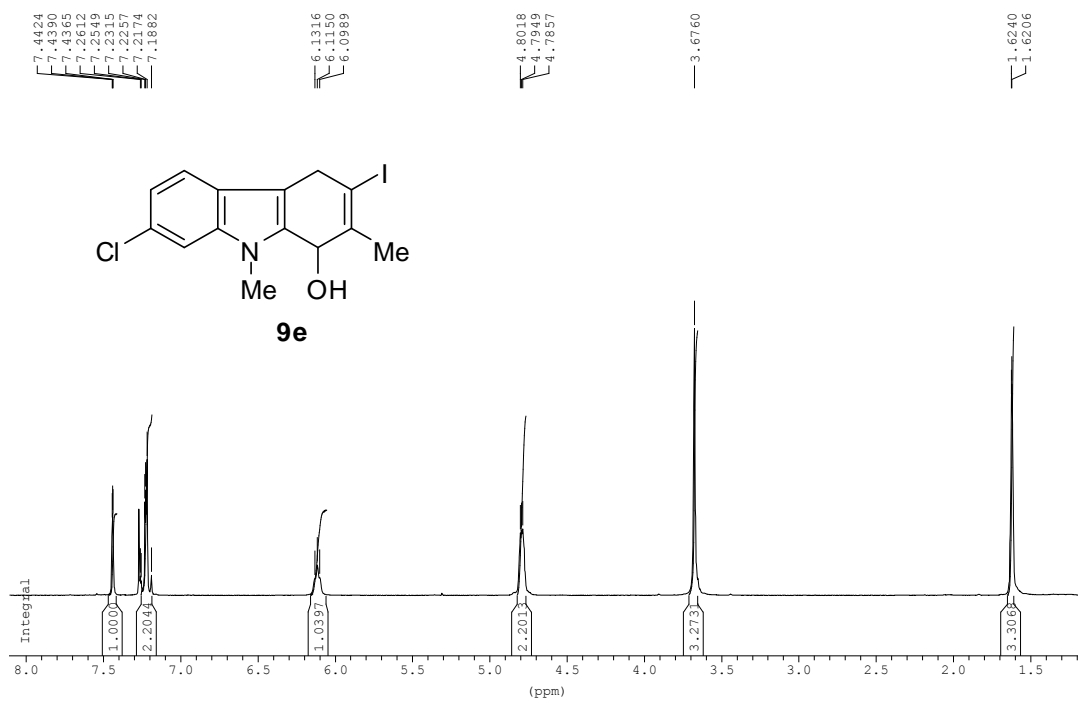

Q098C500RD2

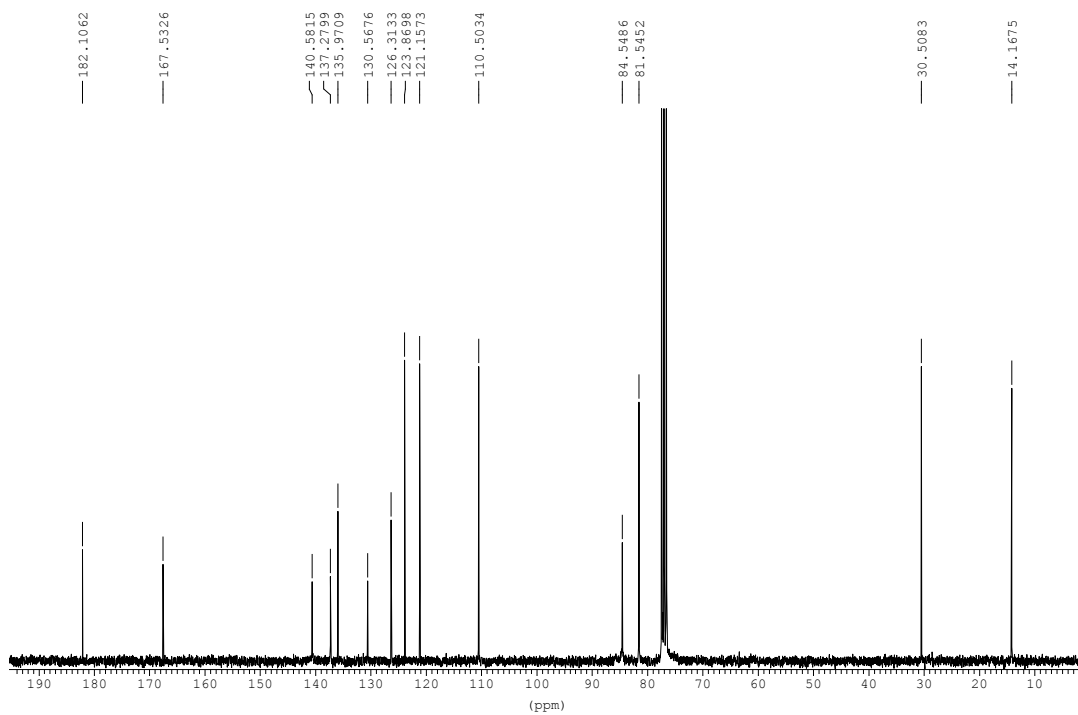

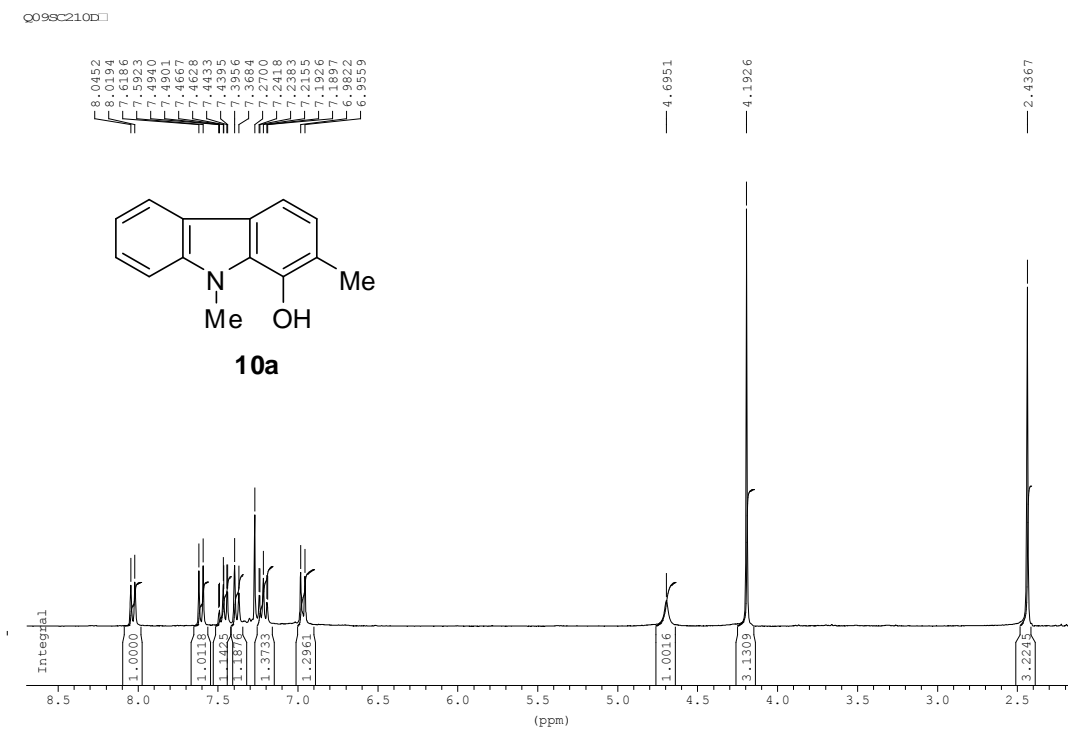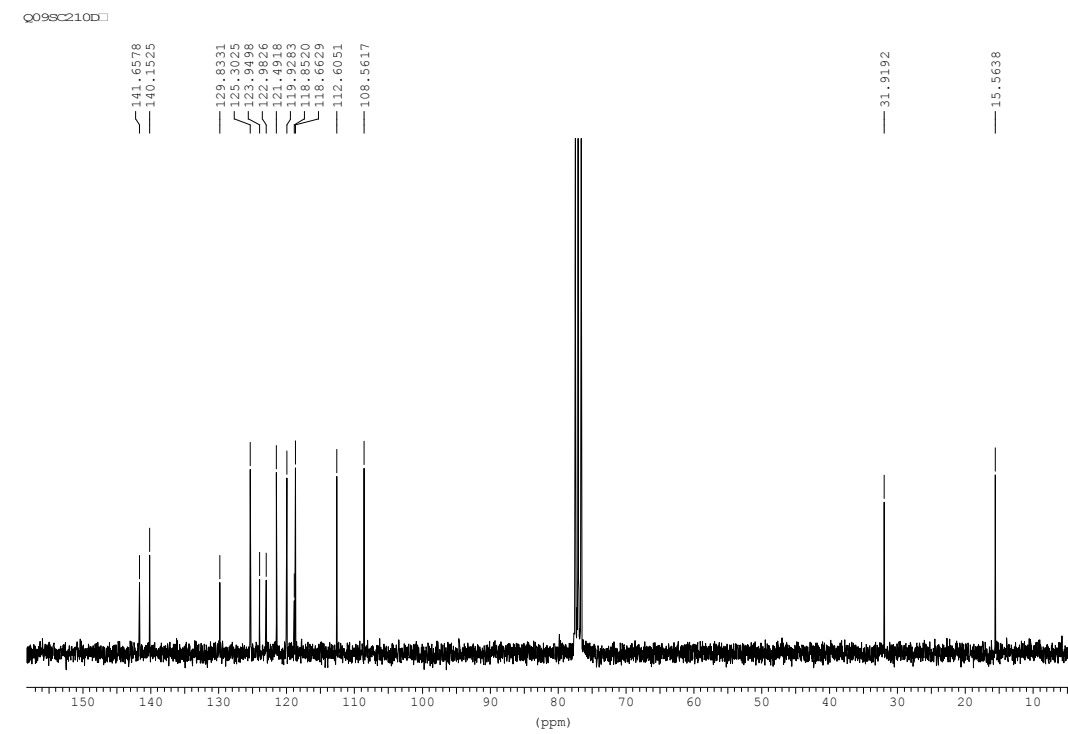

Alcaide, Dr.  
José M.  
Alonso,  
Dipl.-Chem.

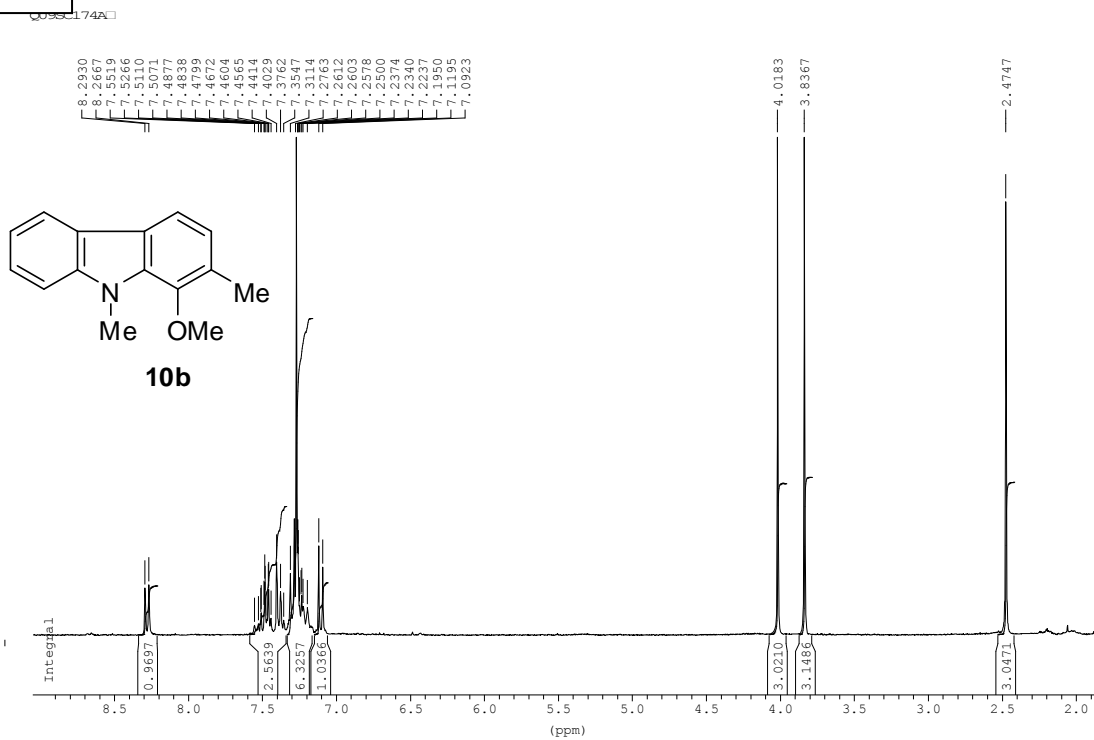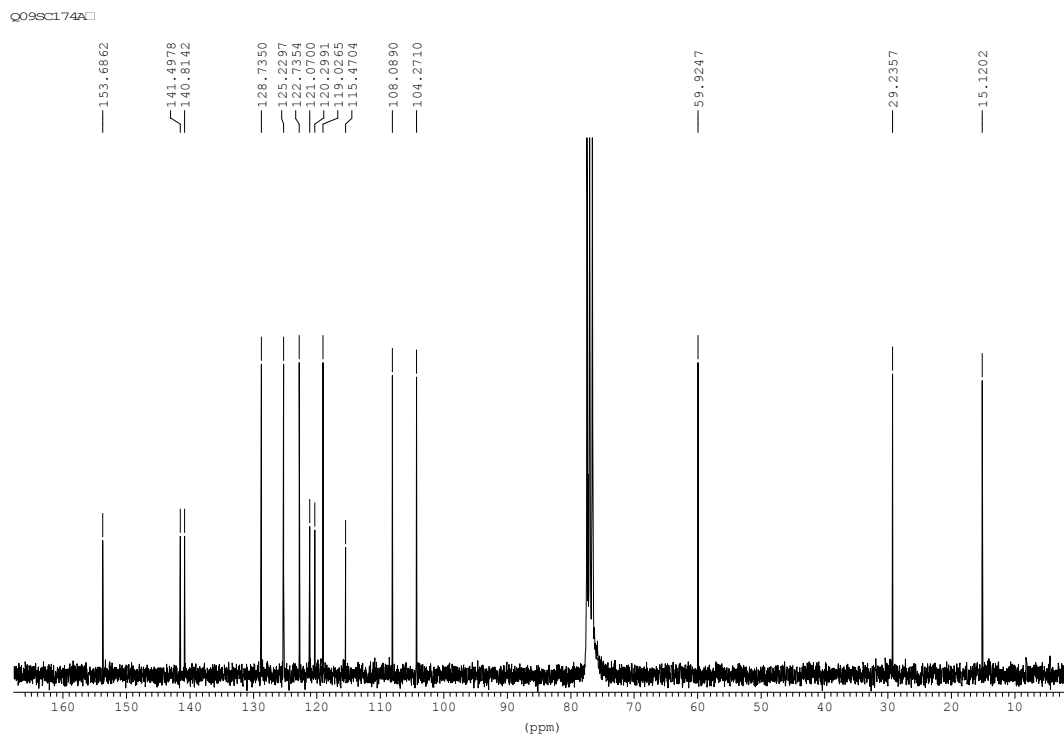

Supplement: c3cc44073g.pdf [file c3cc44073g.pdf]
